# Supplementary material for: Metal-free construction of dihydropyrazino[2,3-b]indoles from 2-aminoacetophenones, isocyanates and 1,2-diamines
Source: Royal Society of Chemistry journal article supplement (doi:10.1039/d3ob01967e), 2024-01-01

**Electronic Supporting Information for**  
**Metal-Free Construction of Dihydropyrazino[2,3-*b*]indoles from 2-**  
**Aminoacetophenones, Isocyanates and 1,2-Diamines**

Jingxi Fang, Jiayao Fang, Yingbo Rao, Huanyi Qiu, Zhentao Pan\* and Yongmin Ma\*

Institute of Advanced Studies and School of Pharmaceutical and Chemical  
Engineering, Taizhou University, Taizhou 318000, P R China.

\*Corresponding author: panzt@tzc.edu.cn; yongmin.ma@tzc.edu.cn

**Table of Contents**

|                                                                              |                |
|------------------------------------------------------------------------------|----------------|
| <b>1) General information.....</b>                                           | <b>S2</b>      |
| <b>2) Experimental section.....</b>                                          | <b>S2-S3</b>   |
| <b>3) HRMS analysis.....</b>                                                 | <b>S3</b>      |
| <b>4) Characterization data of products.....</b>                             | <b>S3-S22</b>  |
| <b>5) <sup>1</sup>H NMR and <sup>13</sup>C NMR spectra of products .....</b> | <b>S23-S65</b> |

## 1. General information.

All starting materials and reagents were purchased from commercial sources and used as received unless otherwise noted. Reactions were monitored using thin-layer chromatography (TLC) on commercial silica gel plates. Visualization of the developed plates was performed under UV light (254 nm). NMR spectra data were obtained on Avance (III) HD 400 MHz instruments. <sup>1</sup>H NMR and <sup>13</sup>C NMR spectra were referenced to residual protic solvent peaks or TMS signal (0 ppm). Data for <sup>1</sup>H NMR are recorded as follows: chemical shift ( $\delta$ , ppm), multiplicity (s = singlet, d = doublet, t = triplet, m = multiplet or unresolved, br = broad singlet, coupling constant (s) in Hz, integration). Data for <sup>13</sup>C NMR are reported in terms of chemical shift ( $\delta$ , ppm). HRMS Spectra were obtained with Waters Q-TOF Premier (ESI, positive mode) spectrometers.

## 2. Experimental section

### 2.1 General synthesis of dihydropyrazino[2,3-*b*]indoles 4

A solution of 2-aminoacetophenones **1** (1.0 mmol), isocyanates **2** (2.0 mmol) and TsOH (0.1 mmol) were dissolved in 2-MeTHF (5 mL) under an ambient atmosphere. The mixture was stirred at rt for 12 h. Then 1,2-diamines **3** (1.2 mmol), I<sub>2</sub> (1.1 mmol) and NaOH (1.2 mmol) was added into the mixture. The resulting mixture was further stirred at rt for 4 h. After the reaction was completed, Na<sub>2</sub>S<sub>2</sub>O<sub>3</sub> (2.0 mmol) was added and the mixture was vigorously stirred at rt for 10 min to quench the excess I<sub>2</sub>. Then the reaction mixture was concentrated under reduced pressure. The residue was suspended in 20 mL petroleum ether/ethyl acetate (10/1 v/v) and was then filtered by a Buchner funnel, which contains a layer of silica gel (SiO<sub>2</sub>). The filtrate was concentrated under reduced pressure to yield the crude product, which was purified by recrystallization from hexane/CH<sub>2</sub>Cl<sub>2</sub>.

### 2.2 Gram-scale preparation of 4a

A solution of 2-aminoacetophenone **1a** (1.35 g, 10 mmol), *p*-tolyl isocyanate **2a** (2.66 g, 20 mmol) and TsOH (172 mg, 1.0 mmol) were dissolved in 2-MeTHF (50 mL) under an ambient atmosphere. The mixture was stirred at rt for 12 h. Then cyclohexane-1,2-diamine **3a** (1.37 g, 12 mmol), I<sub>2</sub> (2.79 g, 11 mmol) and NaOH (480 mg, 12 mmol) was added into the mixture. The resulting mixture was further stirred at rt for 4 h. After the reaction was completed, Na<sub>2</sub>S<sub>2</sub>O<sub>3</sub> (1.90 g, 20 mmol) was added and the mixture was vigorously stirred at rt for 10 min to quench the excess I<sub>2</sub>. Then the reaction mixture was concentrated under reduced pressure. The residue was suspended in 200 mL petroleum ether/ethyl acetate (10/1) and was then filtered by a Buchner funnel, which contains a layer of silica gel (SiO<sub>2</sub>). The filtrate was concentrated under reduced pressure to yield the crude product, which was purified by recrystallization from hexane/CH<sub>2</sub>Cl<sub>2</sub> to give the pure product **4a** as a white solid (2.94 g, 82%).

### 2.3 Synthesis of pyrazino[2,3-*b*]indole **5w**

A solution of dihydropyrazino[2,3-*b*]indole **4w** (374 mg, 1.0 mmol) and  $K_2S_2O_8$  (811 mg, 3.0 mmol) in 2-MeTHF (2 mL) was stirred 60 °C rt for 6 h. After the reaction was completed, the mixture was filtered by a Buchner funnel and the filtrate was concentrated under reduced pressure to yield the crude product, which was purified by recrystallization from hexane/ $CH_2Cl_2$  to give the pure product **5w** as a yellow solid (346 mg, 93%).

### 3. HRMS analysis

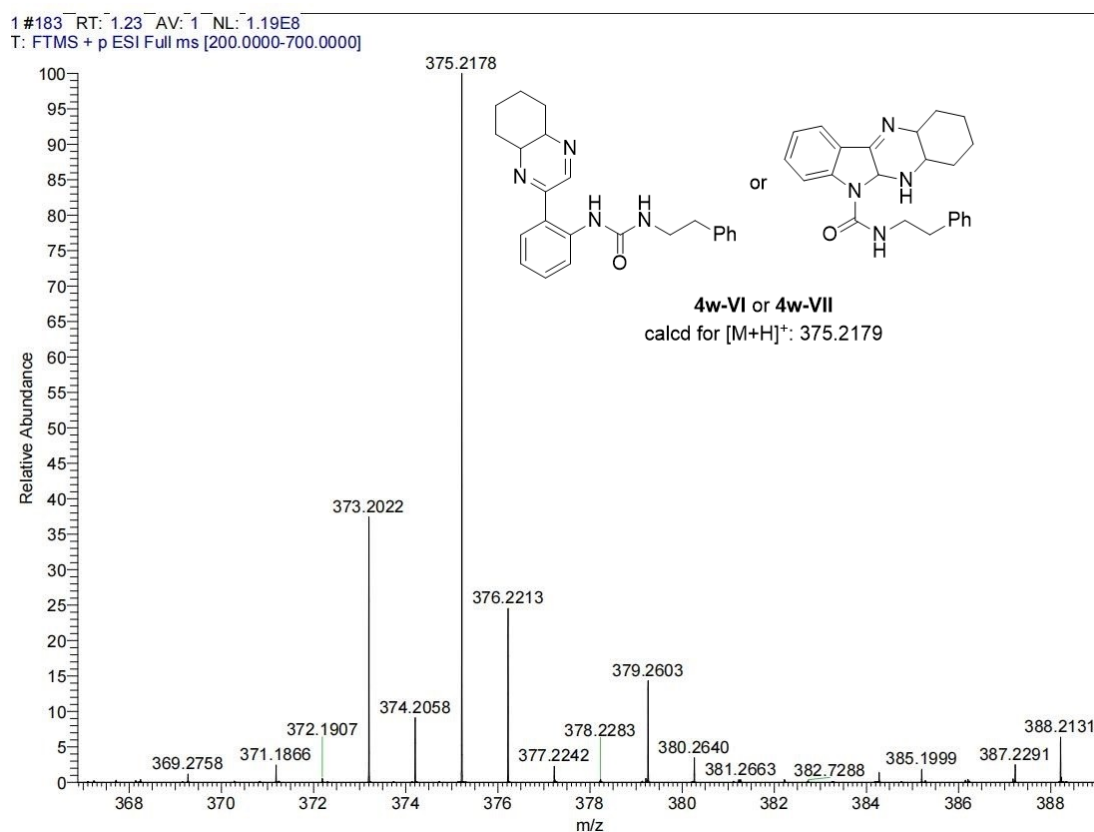

### 4. Characterization data of products

#### *N*-(*p*-Tolyl)-1,2,3,4,4a,11a-hexahydro-6*H*-indolo[2,3-*b*]quinoxaline-6-carboxamide (**4a**)

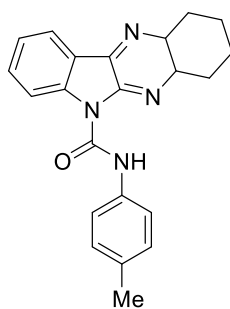

**4a**

Yellow solid, 83% yield, 298.1 mg, m.p. 164.2-166.3 °C, IR (KBr thin film):  $\nu = 3446, 1704, 1608, 1561 \text{ cm}^{-1}$ ;  $^1\text{H NMR}$  (400 MHz,  $\text{CDCl}_3$ )  $\delta$  11.51 (s, 1H), 8.42 (d,  $J = 8.0 \text{ Hz}$ , 1H), 7.76 (d,  $J = 7.2 \text{ Hz}$ , 1H), 7.45 (dd,  $J = 21.2, 7.6 \text{ Hz}$ , 3H), 7.15 (dd,  $J = 12.8, 7.6 \text{ Hz}$ , 3H), 3.94 – 3.12 (m, 2H), 2.50 (d,  $J = 12.8 \text{ Hz}$ , 1H), 2.36 (s, 1H), 2.32 (d,  $J = 3.2 \text{ Hz}$ , 3H), 2.00 – 1.84 (m, 2H), 1.65 – 1.54 (m, 2H), 1.47 (t,  $J = 8.4 \text{ Hz}$ , 2H).  $^{13}\text{C NMR}$  (100 MHz,  $\text{CDCl}_3$ )  $\delta$  152.9, 150.1, 149.0, 146.6, 135.3, 133.8, 133.5, 129.5, 124.1, 122.2, 121.2, 120.1, 117.2, 61.2, 58.6, 34.2, 33.5, 26.0, 25.6, 20.9. HRMS (ESI-TOF)  $m/z$   $[\text{M} + \text{H}]^+$  Calcd for  $\text{C}_{22}\text{H}_{23}\text{N}_4\text{O}^+$  359.1866, found: 359.1861.

***N*-(4-Butylphenyl)-1,2,3,4,4a,11a-hexahydro-6*H*-indolo[2,3-*b*]quinoxaline-6-carboxamide (4b)**

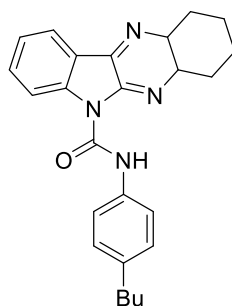

**4b**

Yellow solid, 80% yield, 320.8 mg, m.p. 143.4-144.7 °C, IR (KBr thin film):  $\nu = 3435, 1703, 1608, 1561 \text{ cm}^{-1}$ ;  $^1\text{H NMR}$  (400 MHz,  $\text{CDCl}_3$ )  $\delta$  11.50 (s, 1H), 8.43 (d,  $J = 8.4 \text{ Hz}$ , 1H), 7.77 (d,  $J = 7.6 \text{ Hz}$ , 1H), 7.50 – 7.40 (m, 3H), 7.15 (d,  $J = 8.4 \text{ Hz}$ , 3H), 3.31 – 3.16 (m, 2H), 2.59 (t,  $J = 7.6 \text{ Hz}$ , 2H), 2.50 (dd,  $J = 12.8, 3.1 \text{ Hz}$ , 1H), 2.35 (dt,  $J = 13.2, 2.8 \text{ Hz}$ , 1H), 1.97 – 1.87 (m, 2H), 1.60 (qt,  $J = 7.2, 2.4 \text{ Hz}$ , 4H), 1.51 – 1.41 (m, 2H), 1.35 (q,  $J = 7.2 \text{ Hz}$ , 2H), 0.93 (t,  $J = 7.2 \text{ Hz}$ , 3H).  $^{13}\text{C NMR}$  (100 MHz,  $\text{CDCl}_3$ )  $\delta$  152.9, 150.2, 149.0, 146.7, 138.7, 135.4, 133.8, 128.9, 124.2, 122.3, 121.2, 120.3, 117.2, 61.2, 58.7, 35.1, 34.2, 33.8, 33.5, 26.0, 25.6, 22.3, 14.0. HRMS (ESI)  $m/z$ :  $[\text{M} + \text{H}]^+$  calcd for  $\text{C}_{25}\text{H}_{29}\text{N}_4\text{O}^+$  401.2336, found: 401.2328.

***N*-(4-Methoxyphenyl)-1,2,3,4,4a,11a-hexahydro-6*H*-indolo[2,3-*b*]quinoxaline-6-carboxamide (4c)**

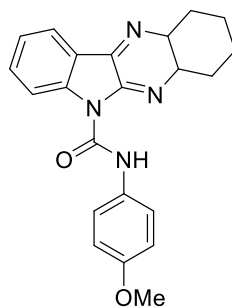

**4c**

Yellow solid, 84% yield, 315.1 mg, m.p. 189.2-191.6 °C, IR (KBr thin film):  $\nu = 3446, 1705, 1605, 1559 \text{ cm}^{-1}$ ;  $^1\text{H NMR}$  (400 MHz,  $\text{CDCl}_3$ )  $\delta$  11.42 (s, 1H), 8.41 (d,  $J = 8.4 \text{ Hz}$ , 1H), 7.76 (dd,  $J = 7.2, 1.2 \text{ Hz}$ , 1H), 7.45 (d,  $J = 9.2 \text{ Hz}$ , 3H), 7.15 (t,  $J = 7.2 \text{ Hz}$ , 1H), 6.88 (d,  $J = 9.2 \text{ Hz}$ , 2H), 3.80 (s, 3H), 3.20 (t,  $J = 11.2 \text{ Hz}$ , 2H), 2.49 (d,  $J = 12.0 \text{ Hz}$ , 1H), 2.33 (d,  $J = 12.0 \text{ Hz}$ , 1H), 1.94 (t,  $J = 7.6 \text{ Hz}$ , 2H), 1.66 – 1.53 (m, 2H), 1.45 (q,  $J = 11.6, 10.4 \text{ Hz}$ , 2H).  $^{13}\text{C NMR}$  (100 MHz,  $\text{CDCl}_3$ )  $\delta$  156.2,

152.9, 150.3, 148.9, 146.7, 133.8, 131.0, 124.1, 122.2, 121.8, 121.2, 117.1, 114.2, 61.2, 58.6, 55.5, 34.2, 33.5, 26.0, 25.6. HRMS (ESI) m/z: [M+H]<sup>+</sup> calcd for C<sub>22</sub>H<sub>23</sub>N<sub>4</sub>O<sub>2</sub><sup>+</sup> 375.1816, found: 375.1823.

***N*-(4-(Trifluoromethoxy)phenyl)-1,2,3,4,4a,11a-hexahydro-6*H*-indolo[2,3-*b*]quinoxaline-6-carboxamide (4d)**

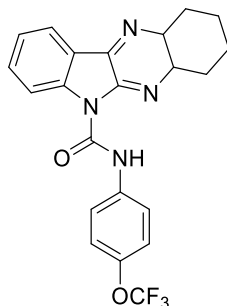

**4d**

Yellow solid, 78% yield, 334.6 mg, m.p. 95.7-97.1 °C, IR (KBr thin film):  $\nu = 3435, 1711, 1608, 1572 \text{ cm}^{-1}$ ; <sup>1</sup>H NMR (400 MHz, CDCl<sub>3</sub>)  $\delta$  11.71 (s, 1H), 8.38 (d,  $J = 8.4 \text{ Hz}$ , 1H), 7.76 (d,  $J = 7.6 \text{ Hz}$ , 1H), 7.56 (d,  $J = 9.2 \text{ Hz}$ , 2H), 7.52 – 7.43 (m, 1H), 7.17 (dd,  $J = 12.4, 8.1 \text{ Hz}$ , 3H), 3.49 – 3.03 (m, 2H), 2.50 (d,  $J = 13.2 \text{ Hz}$ , 1H), 2.34 (d,  $J = 13.2 \text{ Hz}$ , 1H), 2.02 – 1.84 (m, 2H), 1.61 (d,  $J = 7.2 \text{ Hz}$ , 2H), 1.47 (t,  $J = 9.6 \text{ Hz}$ , 2H). <sup>13</sup>C NMR (100 MHz, CDCl<sub>3</sub>)  $\delta$  152.7, 150.0, 148.9, 146.3, 136.7, 133.8, 124.4, 122.3, 121.8, 121.2, 121.2 (d,  $J = 187.2 \text{ Hz}$ ), 121.0, 117.1, 61.3, 58.6, 34.2, 33.5, 25.9, 25.5. HRMS (ESI) m/z: [M+H]<sup>+</sup> calcd for C<sub>22</sub>H<sub>20</sub>F<sub>3</sub>N<sub>4</sub>O<sub>2</sub><sup>+</sup> 429.1533, found: 429.1538.

***N*-(4-(Trifluoromethyl)phenyl)-1,2,3,4,4a,11a-hexahydro-6*H*-indolo[2,3-*b*]quinoxaline-6-carboxamide (4e)**

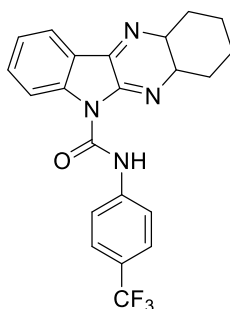

**4e**

Yellow solid, 81% yield, 334.6 mg, m.p. 173.7-174.8 °C, IR (KBr thin film):  $\nu = 3446, 1717, 1610, 1567 \text{ cm}^{-1}$ ; <sup>1</sup>H NMR (400 MHz, CDCl<sub>3</sub>)  $\delta$  11.89 (s, 1H), 8.38 (d,  $J = 8.4 \text{ Hz}$ , 1H), 7.76 (d,  $J = 6.4 \text{ Hz}$ , 1H), 7.65 (d,  $J = 8.4 \text{ Hz}$ , 2H), 7.57 (d,  $J = 8.4 \text{ Hz}$ , 2H), 7.47 (t,  $J = 7.2 \text{ Hz}$ , 1H), 7.18 (t,  $J = 7.6 \text{ Hz}$ , 1H), 3.36 – 3.04 (m, 2H), 2.51 (d,  $J = 12.8 \text{ Hz}$ , 1H), 2.35 (d,  $J = 13.2 \text{ Hz}$ , 1H), 2.05 – 1.87 (m, 2H), 1.62 (q,  $J = 11.2, 10.6 \text{ Hz}$ , 2H), 1.46 (q,  $J = 9.2 \text{ Hz}$ , 2H). <sup>13</sup>C NMR (100 MHz, CDCl<sub>3</sub>)  $\delta$  152.6, 149.8, 148.9, 146.2, 141.2, 133.9, 126.3 (q,  $J = 3.8 \text{ Hz}$ ), 125.7, 125.4, 124.5, 124.2 (q,  $J = 269.7 \text{ Hz}$ ), 122.3, 121.3, 119.4, 117.1, 61.3, 58.6, 34.2, 33.5, 25.9, 25.6. HRMS (ESI) m/z: [M+H]<sup>+</sup> calcd for C<sub>22</sub>H<sub>20</sub>F<sub>3</sub>N<sub>4</sub>O<sup>+</sup> 413.1584, found: 413.1588.

***N*-(4-Fluorophenyl)-1,2,3,4,4a,11a-hexahydro-6*H*-indolo[2,3-*b*]quinoxaline-6-carboxamide (4f)**

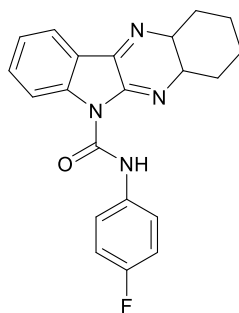

**4f**

Yellow solid, 75% yield, 272.3 mg, m.p. 170.5-172.5 °C, IR (KBr thin film):  $\nu = 3446, 1707, 1607, 1579 \text{ cm}^{-1}$ ;  $^1\text{H NMR}$  (400 MHz,  $\text{CDCl}_3$ )  $\delta$  11.58 (s, 1H), 8.40 (d,  $J = 8.0 \text{ Hz}$ , 1H), 7.77 (d,  $J = 9.2 \text{ Hz}$ , 1H), 7.58 – 7.38 (m, 3H), 7.18 (t,  $J = 7.2 \text{ Hz}$ , 1H), 7.04 (t,  $J = 8.8 \text{ Hz}$ , 2H), 3.95 – 3.13 (m, 2H), 2.51 (d,  $J = 12.4 \text{ Hz}$ , 1H), 2.35 (d,  $J = 13.2 \text{ Hz}$ , 1H), 1.94 (t,  $J = 13.6 \text{ Hz}$ , 2H), 1.69 – 1.55 (m, 2H), 1.47 (t,  $J = 8.8 \text{ Hz}$ , 2H).  $^{13}\text{C NMR}$  (100 MHz,  $\text{CDCl}_3$ )  $\delta$  159.2 (d,  $J = 241.4 \text{ Hz}$ ), 152.8, 150.2, 148.9, 146.5, 133.9 (d,  $J = 2.7 \text{ Hz}$ ), 133.9, 124.3, 122.3, 121.7, 121.7, 121.2, 117.1, 115.8, 115.6, 61.3, 58.6, 34.2, 33.5, 25.9, 25.6. HRMS (ESI)  $m/z$ :  $[\text{M}+\text{H}]^+$  calcd for  $\text{C}_{21}\text{H}_{20}\text{FN}_4\text{O}^+$  363.1616, found: 363.1611.

***N*-(4-Chlorophenyl)-1,2,3,4,4a,11a-hexahydro-6*H*-indolo[2,3-*b*]quinoxaline-6-carboxamide (4g)**

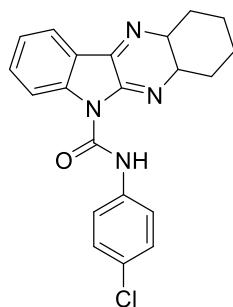

**4g**

Yellow solid, 74% yield, 280.5 mg, m.p. 196.5-197.3 °C, IR (KBr thin film):  $\nu = 3446, 1704, 1606, 1557 \text{ cm}^{-1}$ ;  $^1\text{H NMR}$  (400 MHz,  $\text{CDCl}_3$ )  $\delta$  11.68 (s, 1H), 8.39 (d,  $J = 8.4 \text{ Hz}$ , 1H), 7.77 (d,  $J = 6.4 \text{ Hz}$ , 1H), 7.52 – 7.46 (m, 1H), 7.45 (d,  $J = 9.6 \text{ Hz}$ , 4H), 7.17 (t,  $J = 7.6 \text{ Hz}$ , 1H), 3.91 – 3.07 (m, 2H), 2.51 (d,  $J = 12.4 \text{ Hz}$ , 1H), 2.35 (d,  $J = 12.8 \text{ Hz}$ , 1H), 2.02 – 1.81 (m, 2H), 1.68 – 1.55 (m, 2H), 1.53 – 1.34 (m, 2H).  $^{13}\text{C NMR}$  (100 MHz,  $\text{CDCl}_3$ )  $\delta$  152.7, 149.9, 148.9, 146.3, 137.1, 133.9, 132.0, 124.4, 122.3, 121.5, 121.4, 121.2, 117.1, 116.4, 61.3, 58.6, 34.2, 33.5, 25.9, 25.6. HRMS (ESI)  $m/z$ :  $[\text{M}+\text{H}]^+$  calcd for  $\text{C}_{21}\text{H}_{20}\text{ClN}_4\text{O}^+$  379.1320, found: 379.1316.

***N*-(4-Bromophenyl)-1,2,3,4,4a,11a-hexahydro-6*H*-indolo[2,3-*b*]quinoxaline-6-carboxamide (4h)**

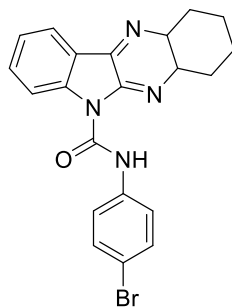

**4h**

Yellow solid, 79% yield, 334.2 mg, m.p. 274.1-275.2 °C, IR (KBr thin film):  $\nu = 3420, 1716, 1606, 1553 \text{ cm}^{-1}$ ;  $^1\text{H NMR}$  (400 MHz,  $\text{CDCl}_3$ )  $\delta$  11.67 (s, 1H), 8.38 (d,  $J = 8.4 \text{ Hz}$ , 1H), 7.76 (d,  $J = 7.6 \text{ Hz}$ , 1H), 7.47 (t,  $J = 8.4 \text{ Hz}$ , 1H), 7.43 (s, 4H), 7.17 (t,  $J = 7.2 \text{ Hz}$ , 1H), 3.96 – 3.11 (m, 2H), 2.50 (d,  $J = 12.8 \text{ Hz}$ , 1H), 2.34 (d,  $J = 12.4 \text{ Hz}$ , 1H), 2.08 – 1.81 (m, 2H), 1.61 (d,  $J = 12.0 \text{ Hz}$ , 2H), 1.47 (t,  $J = 9.6 \text{ Hz}$ , 2H).  $^{13}\text{C NMR}$  (100MHz,  $\text{CDCl}_3$ )  $\delta$  152.7, 149.9, 148.9, 146.3, 137.1, 133.8, 132.0, 124.4, 122.3, 121.4, 121.2, 117.1, 116.4, 61.3, 58.6, 34.2, 33.5, 25.9, 25.6. HRMS (ESI)  $m/z$ :  $[\text{M}+\text{H}]^+$  calcd for  $\text{C}_{21}\text{H}_{20}\text{BrN}_4\text{O}^+$  423.0815, found: 423.0818.

***N*-(*m*-Tolyl)-1,2,3,4,4a,11a-hexahydro-6*H*-indolo[2,3-*b*]quinoxaline-6-carboxamide (4i)**

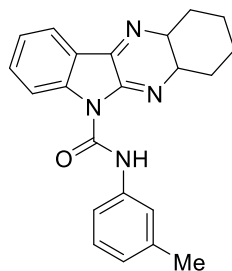

**4i**

Yellow solid, 82% yield, 294.5 mg, m.p. 161.7-162.5 °C, IR (KBr thin film):  $\nu = 3446, 1706, 1600, 1578 \text{ cm}^{-1}$ ;  $^1\text{H NMR}$  (400 MHz,  $\text{CDCl}_3$ )  $\delta$  11.55 (s, 1H), 8.43 (d,  $J = 8.4 \text{ Hz}$ , 1H), 7.76 (d,  $J = 7.6 \text{ Hz}$ , 1H), 7.48 (t,  $J = 8.0 \text{ Hz}$ , 1H), 7.42 (s, 1H), 7.31 (d,  $J = 8.0 \text{ Hz}$ , 1H), 7.22 (t,  $J = 7.6 \text{ Hz}$ , 1H), 7.16 (t,  $J = 7.6 \text{ Hz}$ , 1H), 6.92 (d,  $J = 7.6 \text{ Hz}$ , 1H), 3.31 – 3.13 (m, 2H), 2.50 (d,  $J = 14.0 \text{ Hz}$ , 1H), 2.36 (s, 4H), 2.00 – 1.87 (m, 2H), 1.61 (q,  $J = 12.4 \text{ Hz}$ , 2H), 1.46 (q,  $J = 8.8 \text{ Hz}$ , 2H).  $^{13}\text{C NMR}$  (100 MHz,  $\text{CDCl}_3$ )  $\delta$  152.9, 150.1, 149.0, 146.6, 139.0, 137.9, 133.8, 128.8, 124.8, 124.2, 122.2, 121.2, 120.7, 117.20, 117.18, 61.3, 58.6, 34.2, 33.5, 26.0, 25.6, 21.6. HRMS (ESI)  $m/z$ :  $[\text{M}+\text{H}]^+$  calcd for  $\text{C}_{22}\text{H}_{23}\text{N}_4\text{O}^+$  359.1866, found: 359.1861.

***N*-(3-Fluorophenyl)-1,2,3,4,4a,11a-hexahydro-6*H*-indolo[2,3-*b*]quinoxaline-6-carboxamide (4j)**

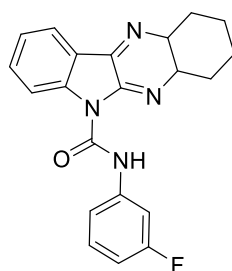

**4j**

Yellow solid, 77% yield, 279.6 mg, m.p. 156.4-158.3 °C, IR (KBr thin film):  $\nu = 3446, 1703, 1607, 1568 \text{ cm}^{-1}$ ;  $^1\text{H NMR}$  (400 MHz,  $\text{CDCl}_3$ )  $\delta$  11.73 (s, 1H), 8.37 (d,  $J = 8.4 \text{ Hz}$ , 1H), 7.74 (d,  $J = 6.4 \text{ Hz}$ , 1H), 7.53 – 7.41 (m, 2H), 7.29 – 7.22 (m, 1H), 7.15 (t,  $J = 7.4 \text{ Hz}$ , 2H), 6.77 (td,  $J = 8.0, 2.4 \text{ Hz}$ , 1H), 3.39 – 3.00 (m, 2H), 2.49 (d,  $J = 13.2 \text{ Hz}$ , 1H), 2.33 (d,  $J = 12.8 \text{ Hz}$ , 1H), 1.98 – 1.86 (m, 2H), 1.60 (d,  $J = 12.4 \text{ Hz}$ , 2H), 1.52 – 1.36 (m, 2H).  $^{13}\text{C NMR}$  (100 MHz,  $\text{CDCl}_3$ )  $\delta$  163.1 (d,  $J = 242.9 \text{ Hz}$ ), 152.6, 149.8, 148.8, 146.3, 139.6 (d,  $J = 10.9 \text{ Hz}$ ), 133.8, 130.0 (d,  $J = 9.4 \text{ Hz}$ ), 128.1 (d,  $J = 8.8 \text{ Hz}$ ), 124.4, 122.3, 121.2, 117.1, 115.1 (d,  $J = 2.8 \text{ Hz}$ ), 110.4 (d,  $J = 21.2 \text{ Hz}$ ), 107.2 (d,  $J = 26.2 \text{ Hz}$ ), 61.2, 58.6, 34.2, 33.5, 25.9, 25.6. HRMS (ESI)  $m/z$ :  $[\text{M}+\text{H}]^+$  calcd for  $\text{C}_{21}\text{H}_{20}\text{FN}_4\text{O}^+$  363.1616, found: 363.1611.

***N*-(3-Chlorophenyl)-1,2,3,4,4a,11a-hexahydro-6*H*-indolo[2,3-*b*]quinoxaline-6-carboxamide (4k)**

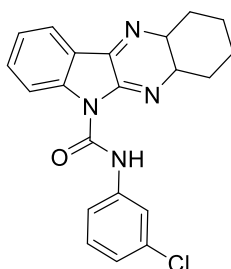**4k**

Yellow solid, 62% yield, 235.0 mg, m.p. 133.7-134.5 °C, IR (KBr thin film):  $\nu = 3446, 1706, 1596, 1558 \text{ cm}^{-1}$ ;  $^1\text{H NMR}$  (400 MHz,  $\text{CDCl}_3$ )  $\delta$  11.72 (s, 1H), 8.39 (d,  $J = 8.0 \text{ Hz}$ , 1H), 7.76 (d,  $J = 7.6 \text{ Hz}$ , 1H), 7.67 (t,  $J = 2.0 \text{ Hz}$ , 1H), 7.48 (t,  $J = 8.0 \text{ Hz}$ , 1H), 7.36 (d,  $J = 8.4 \text{ Hz}$ , 1H), 7.23 (t,  $J = 8.0 \text{ Hz}$ , 1H), 7.17 (t,  $J = 7.6 \text{ Hz}$ , 1H), 7.06 (d,  $J = 6.0 \text{ Hz}$ , 1H), 3.94 – 3.13 (m, 2H), 2.51 (d,  $J = 13.6 \text{ Hz}$ , 1H), 2.36 (d,  $J = 12.8 \text{ Hz}$ , 1H), 2.01 – 1.81 (m, 2H), 1.61 (q,  $J = 12.0 \text{ Hz}$ , 2H), 1.55 – 1.38 (m, 2H).  $^{13}\text{C NMR}$  (100 MHz,  $\text{CDCl}_3$ )  $\delta$  152.7, 149.8, 148.9, 146.3, 139.2, 134.7, 133.8, 130.0, 124.4, 123.9, 122.3, 121.2, 119.9, 117.9, 117.1, 61.3, 58.6, 34.2, 33.5, 25.9, 25.6. HRMS (ESI)  $m/z$ :  $[\text{M}+\text{H}]^+$  calcd for  $\text{C}_{21}\text{H}_{20}\text{ClN}_4\text{O}^+$  379.1320, found: 379.1316.

***N*-(*o*-Tolyl)-1,2,3,4,4a,11a-hexahydro-6*H*-indolo[2,3-*b*]quinoxaline-6-carboxamide (4l)**

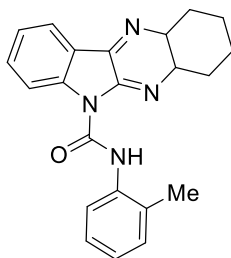**4l**

Yellow solid, 77% yield, 276.3 mg, m.p. 162.5-163.7 °C, IR (KBr thin film):  $\nu = 3436, 1711, 1596, 1563 \text{ cm}^{-1}$ ;  $^1\text{H NMR}$  (400 MHz,  $\text{CDCl}_3$ )  $\delta$  11.23 (s, 1H), 8.43 (d,  $J = 8.4 \text{ Hz}$ , 1H), 8.17 (d,  $J = 8.0 \text{ Hz}$ , 1H), 7.75 (d,  $J = 8.0 \text{ Hz}$ , 1H), 7.53 – 7.42 (m, 1H), 7.22 (d,  $J = 8.4 \text{ Hz}$ , 1H), 7.16 (q,  $J = 8.4, 7.6 \text{ Hz}$ , 2H), 7.03 (d,  $J = 7.2 \text{ Hz}$ , 1H), 3.44 – 2.77 (m, 2H), 2.49 (d,  $J = 5.6 \text{ Hz}$ , 1H), 2.35 (s, 1H), 2.32 (s, 3H), 1.96 – 1.84 (m, 2H), 1.56 (q,  $J = 16.4, 14.4 \text{ Hz}$ , 2H), 1.44 (d,  $J = 10.8 \text{ Hz}$ , 2H).  $^{13}\text{C}$



NMR (100 MHz, CDCl<sub>3</sub>)  $\delta$  152.8, 150.2, 149.0, 146.7, 136.6, 133.8, 130.4, 127.8, 126.7, 124.2, 123.9, 122.2, 121.3, 121.1, 117.23, 61.1, 58.6, 34.0, 33.5, 25.9, 25.6, 19.0. HRMS (ESI)  $m/z$ : [M+H]<sup>+</sup> calcd for C<sub>22</sub>H<sub>23</sub>N<sub>4</sub>O<sup>+</sup> 359.1866, found: 359.1861.

***N*-(2-Methoxyphenyl)-1,2,3,4,4a,11a-hexahydro-6*H*-indolo[2,3-*b*]quinoxaline-6-carboxamide (4m)**

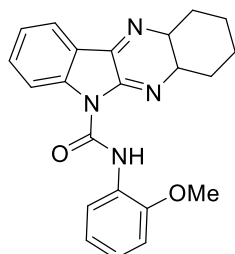

**4m**

Yellow solid, 75% yield, 281.4 mg, m.p. 153.5-155.3 °C, IR (KBr thin film):  $\nu$  = 3412, 1713, 1605, 1548 cm<sup>-1</sup>; <sup>1</sup>H NMR (400 MHz, CDCl<sub>3</sub>)  $\delta$  11.76 (s, 1H), 8.46 (d,  $J$  = 8.4 Hz, 1H), 8.39 (d,  $J$  = 6.0 Hz, 1H), 7.76 (d,  $J$  = 8.8 Hz, 1H), 7.50 – 7.43 (m, 1H), 7.15 (t,  $J$  = 7.6 Hz, 1H), 7.05 – 6.95 (m, 2H), 6.88 (d,  $J$  = 7.6 Hz, 1H), 3.89 (s, 3H), 3.19 (q,  $J$  = 16.0, 15.2 Hz, 2H), 2.49 (d,  $J$  = 14.0 Hz, 1H), 2.36 (d,  $J$  = 13.2 Hz, 1H), 1.92 (d,  $J$  = 10.0 Hz, 2H), 1.67 – 1.55 (m, 2H), 1.47 (d,  $J$  = 11.2 Hz, 2H). <sup>13</sup>C NMR (100 MHz, CDCl<sub>3</sub>)  $\delta$  152.8, 149.9, 148.8, 148.7, 146.7, 133.7, 128.0, 124.1, 123.3, 122.2, 121.4, 121.0, 119.9, 117.2, 110.1, 61.1, 58.6, 55.6, 34.1, 33.5, 26.0, 25.7. HRMS (ESI)  $m/z$ : [M+H]<sup>+</sup> calcd for C<sub>22</sub>H<sub>23</sub>N<sub>4</sub>O<sub>2</sub><sup>+</sup> 375.1816, found: 375.1823.

***N*-(2-(Trifluoromethyl)phenyl)-1,2,3,4,4a,11a-hexahydro-6*H*-indolo[2,3-*b*]quinoxaline-6-carboxamide (4n)**

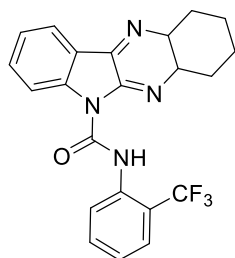

**4n**

Yellow solid, 71% yield, 293.3 mg, m.p. 140.5-142.1 °C, IR (KBr thin film):  $\nu$  = 3421, 1717, 1599, 1564 cm<sup>-1</sup>; <sup>1</sup>H NMR (400 MHz, CDCl<sub>3</sub>)  $\delta$  11.75 (s, 1H), 8.42 (dd,  $J$  = 8.4, 4.4 Hz, 1H), 8.18 (d,  $J$  = 8.0 Hz, 1H), 7.80 (d,  $J$  = 7.6 Hz, 1H), 7.64 (d,  $J$  = 8.0 Hz, 1H), 7.58 (t,  $J$  = 7.2 Hz, 1H), 7.53 – 7.45 (m, 1H), 7.22 (dt,  $J$  = 14.8, 7.8 Hz, 2H), 3.95 – 3.15 (m, 2H), 2.50 (d,  $J$  = 12.4 Hz, 1H), 2.37 (d,  $J$  = 13.6 Hz, 1H), 1.99 – 1.84 (m, 2H), 1.58 (dd,  $J$  = 29.6, 10.8 Hz, 2H), 1.52 – 1.33 (m, 2H). <sup>13</sup>C NMR (100 MHz, CDCl<sub>3</sub>)  $\delta$  152.6, 150.5, 148.8, 146.4, 135.2, 133.8, 132.5, 126.1 (q,  $J$  = 5.3 Hz), 125.3, 124.5, 124.3, 123.8 (d,  $J$  = 271.6 Hz), 122.3, 121.4, 117.3, 61.3, 58.7, 33.5, 33.5, 25.9, 25.6. HRMS (ESI)  $m/z$ : [M+H]<sup>+</sup> calcd for C<sub>22</sub>H<sub>20</sub>F<sub>3</sub>N<sub>4</sub>O<sup>+</sup> 413.1584, found: 413.1588.

***N*-(2-Fluorophenyl)-1,2,3,4,4a,11a-hexahydro-6*H*-indolo[2,3-*b*]quinoxaline-6-carboxamide (4o)**

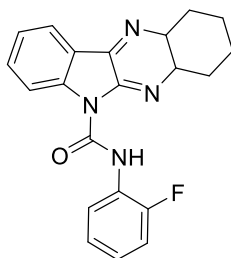

**4o**

Yellow solid, 67% yield, 243.3 mg, m.p. 164.0-165.2 °C, IR (KBr thin film):  $\nu = 3435, 1720, 1606, 1561 \text{ cm}^{-1}$ ;  $^1\text{H NMR}$  (400 MHz,  $\text{CDCl}_3$ )  $\delta$  11.93 (s, 1H), 8.42 (d,  $J = 8.4$  Hz, 1H), 8.34 (t,  $J = 7.2$  Hz, 1H), 7.78 (d,  $J = 6.4$  Hz, 1H), 7.53 – 7.43 (m, 1H), 7.21 – 7.16 (m, 1H), 7.13 (d,  $J = 7.6$  Hz, 1H), 7.09 (d,  $J = 10.8$  Hz, 1H), 7.04 (t,  $J = 7.2$  Hz, 1H), 3.23 (dd,  $J = 13.2, 11.6$  Hz, 2H), 2.50 (d,  $J = 12.8$  Hz, 1H), 2.38 (d,  $J = 13.6$  Hz, 1H), 1.99 – 1.86 (m, 2H), 1.67 – 1.55 (m, 2H), 1.51 – 1.35 (m, 2H).  $^{13}\text{C NMR}$  (100 MHz,  $\text{CDCl}_3$ )  $\delta$  153.0 (d,  $J = 243.2$  Hz), 152.6, 149.9, 148.8, 146.4, 133.8, 126.6 (d,  $J = 10.4$  Hz), 124.5 (d,  $J = 3.1$  Hz), 124.4, 123.8, 123.7, 122.3, 121.4, 117.1, 114.9 (d,  $J = 18.8$  Hz), 61.3, 58.6, 33.9, 33.5, 26.0, 25.6. HRMS (ESI)  $m/z$ :  $[\text{M}+\text{H}]^+$  calcd for  $\text{C}_{21}\text{H}_{20}\text{FN}_4\text{O}^+$  363.1616, found: 363.1611.

***N*-(2-Chlorophenyl)-1,2,3,4,4a,11a-hexahydro-6H-indolo[2,3-*b*]quinoxaline-6-carboxamide (4p)**

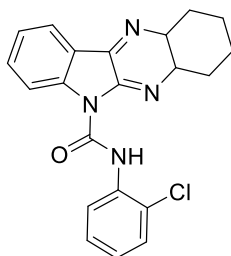

**4p**

Yellow solid, 75% yield, 284.3 mg, m.p. 165.4-166.5 °C, IR (KBr thin film):  $\nu = 3435, 1713, 1598, 1552 \text{ cm}^{-1}$ ;  $^1\text{H NMR}$  (400 MHz,  $\text{CDCl}_3$ )  $\delta$  11.84 (s, 1H), 8.42 (dd,  $J = 8.4, 4.4$  Hz, 2H), 7.76 (dd,  $J = 7.6, 1.2$  Hz, 1H), 7.47 (t,  $J = 8.0$  Hz, 1H), 7.37 (d,  $J = 8.0$  Hz, 1H), 7.26 (t,  $J = 7.2$  Hz, 1H), 7.17 (t,  $J = 7.6$  Hz, 1H), 7.01 (t,  $J = 6.8$  Hz, 1H), 3.51 – 2.87 (m, 2H), 2.49 (d,  $J = 12.4$  Hz, 1H), 2.36 (d,  $J = 13.2$  Hz, 1H), 1.98 – 1.85 (m, 2H), 1.59 (p,  $J = 11.6, 11.2$  Hz, 2H), 1.49 – 1.31 (m, 2H).  $^{13}\text{C NMR}$  (100 MHz,  $\text{CDCl}_3$ )  $\delta$  152.6, 150.0, 148.6, 146.4, 135.6, 133.8, 129.3, 127.4, 124.4, 124.1, 123.6, 122.3, 121.7, 121.5, 117.2, 61.2, 58.6, 33.9, 33.5, 26.0, 25.6. HRMS (ESI)  $m/z$ :  $[\text{M}+\text{H}]^+$  calcd for  $\text{C}_{21}\text{H}_{20}\text{ClN}_4\text{O}^+$  379.1320, found: 379.1316.

***N*-(2-Bromophenyl)-1,2,3,4,4a,11a-hexahydro-6H-indolo[2,3-*b*]quinoxaline-6-carboxamide (4q)**

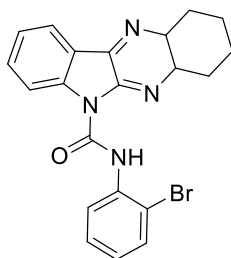

**4q**

Yellow solid, 79% yield, 334.2 mg, m.p. 152.4-153.9 °C, IR (KBr thin film):  $\nu = 3435, 1712, 1591, 1547 \text{ cm}^{-1}$ ;  $^1\text{H NMR}$  (400 MHz,  $\text{CDCl}_3$ )  $\delta$  11.67 (s, 1H), 8.43 (d,  $J = 8.0$  Hz, 1H), 8.34 (d,  $J = 8.4$  Hz, 1H), 7.78 (d,  $J = 8.8$  Hz, 1H), 7.56 (d,  $J = 9.6$  Hz, 1H), 7.49 (t,  $J = 7.2$  Hz, 1H), 7.31 (d,  $J = 7.2$  Hz, 1H), 7.18 (t,  $J = 7.2$  Hz, 1H), 6.97 (t,  $J = 6.8$  Hz, 1H), 3.33 – 3.15 (m, 2H), 2.46 (dd,  $J = 31.2, 13.2$  Hz, 2H), 1.96 – 1.87 (m, 2H), 1.60 (d,  $J = 3.6$  Hz, 2H), 1.45 (q,  $J = 12.4, 11.2$  Hz, 2H).  $^{13}\text{C NMR}$  (100 MHz,  $\text{CDCl}_3$ )  $\delta$  152.6, 150.2, 148.6, 146.4, 136.7, 133.8, 132.7, 128.0, 124.90, 124.4, 122.7, 122.3, 121.5, 117.3, 114.1, 77.4, 77.1, 76.8, 61.2, 58.8, 34.0, 33.5, 25.9, 25.6. HRMS (ESI)  $m/z$ :  $[\text{M}+\text{H}]^+$  calcd for  $\text{C}_{21}\text{H}_{20}\text{BrN}_4\text{O}^+$  423.0815, found: 423.0818.

***N*-(3,4-Dimethylphenyl)-1,2,3,4,4a,11a-hexahydro-6*H*-indolo[2,3-*b*]quinoxaline-6-carboxamide (4r)**

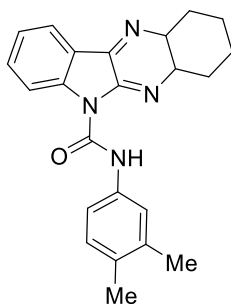

**4r**

Yellow solid, 76% yield, 283.6 mg, m.p. 144.3-146.1 °C, IR (KBr thin film):  $\nu = 3436, 1703, 1603, 1556 \text{ cm}^{-1}$ ;  $^1\text{H NMR}$  (400 MHz,  $\text{CDCl}_3$ )  $\delta$  11.44 (s, 1H), 8.42 (d,  $J = 8.2$  Hz, 1H), 7.76 (d,  $J = 7.6$  Hz, 1H), 7.47 (t,  $J = 7.2$  Hz, 1H), 7.33 (s, 1H), 7.25 (d,  $J = 8.4$  Hz, 1H), 7.15 (t,  $J = 7.6$  Hz, 1H), 7.07 (d,  $J = 8.0$  Hz, 1H), 3.20 (t,  $J = 7.6$  Hz, 2H), 2.49 (d,  $J = 12.8$  Hz, 1H), 2.35 (d,  $J = 12.8$  Hz, 1H), 2.27 (d,  $J = 4.4$  Hz, 3H), 2.22 (s, 3H), 1.91 (dd,  $J = 24.4, 13.2$  Hz, 3H), 1.60 (q,  $J = 12.0, 10.4$  Hz, 2H), 1.45 (d,  $J = 10.0$  Hz, 2H).  $^{13}\text{C NMR}$  (100 MHz,  $\text{CDCl}_3$ )  $\delta$  152.9, 150.1, 149.0, 146.7, 137.3, 135.6, 133.8, 132.3, 130.0, 124.1, 122.2, 121.4, 121.2, 117.6, 117.2, 61.2, 58.6, 34.2, 33.5, 26.0, 25.6, 20.0, 19.2. HRMS (ESI)  $m/z$ :  $[\text{M}+\text{H}]^+$  calcd for  $\text{C}_{23}\text{H}_{25}\text{N}_4\text{O}^+$  373.2023, found: 373.2021.

***N*-(3,4-Dichlorophenyl)-1,2,3,4,4a,11a-hexahydro-6*H*-indolo[2,3-*b*]quinoxaline-6-carboxamide (4s)**

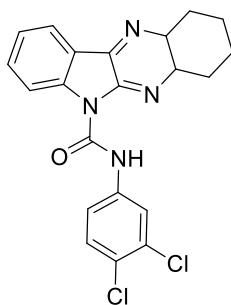

**4s**

Yellow solid, 82% yield, 358.5 mg, m.p. 188.2-189.1 °C, IR (KBr thin film):  $\nu = 3446, 1701, 1597, 1547 \text{ cm}^{-1}$ ;  $^1\text{H NMR}$  (400 MHz,  $\text{CDCl}_3$ )  $\delta$  11.75 (s, 1H), 8.35 (d,  $J = 8.4 \text{ Hz}$ , 1H), 7.97 – 7.59 (m, 2H), 7.47 (t,  $J = 8.4 \text{ Hz}$ , 1H), 7.34 (d,  $J = 8.8 \text{ Hz}$ , 1H), 7.30 (dd,  $J = 8.8, 2.4 \text{ Hz}$ , 1H), 7.18 (t,  $J = 7.6 \text{ Hz}$ , 1H), 3.98 – 3.06 (m, 2H), 2.51 (d,  $J = 13.6 \text{ Hz}$ , 1H), 2.35 (d,  $J = 12.8 \text{ Hz}$ , 1H), 1.95 (t,  $J = 10.8 \text{ Hz}$ , 2H), 1.61 (q,  $J = 12.4 \text{ Hz}$ , 2H), 1.47 (q,  $J = 9.2 \text{ Hz}$ , 2H).  $^{13}\text{C NMR}$  (100 MHz,  $\text{CDCl}_3$ )  $\delta$  152.6, 149.7, 148.8, 146.1, 137.6, 133.8, 132.8, 130.4, 126.9, 124.5, 122.3, 121.3, 121.2, 119.0, 117.0, 61.3, 58.6, 34.2, 33.5, 25.9, 25.6. HRMS (ESI)  $m/z$ :  $[\text{M}+\text{H}]^+$  calcd for  $\text{C}_{21}\text{H}_{19}\text{Cl}_2\text{N}_4\text{O}^+$  413.0930, found: 413.0935.

***N*-(2,4-Difluorophenyl)-1,2,3,4,11a-hexahydro-6*H*-indolo[2,3-*b*]quinoxaline-6-carboxamide (4t)**

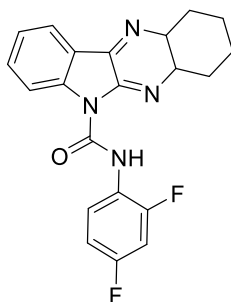

**4t**

Yellow solid, 69% yield, 263.0 mg, m.p. 211.5-213.1 °C, IR (KBr thin film):  $\nu = 3435, 1703, 1609, 1572 \text{ cm}^{-1}$ ;  $^1\text{H NMR}$  (400 MHz,  $\text{CDCl}_3$ )  $\delta$  11.86 (s, 1H), 8.35 (dd,  $J = 8.0, 7.4 \text{ Hz}$ , 2H), 7.79 (d,  $J = 7.6 \text{ Hz}$ , 1H), 7.50 (t,  $J = 8.0 \text{ Hz}$ , 1H), 7.19 (t,  $J = 7.6 \text{ Hz}$ , 1H), 6.89 (t,  $J = 7.2 \text{ Hz}$ , 2H), 3.43 – 3.03 (m, 2H), 2.51 (d,  $J = 12.8 \text{ Hz}$ , 1H), 2.37 (d,  $J = 12.8 \text{ Hz}$ , 1H), 1.92 (d,  $J = 12.8 \text{ Hz}$ , 2H), 1.62 (dd,  $J = 23.2, 12.0 \text{ Hz}$ , 2H), 1.46 (q,  $J = 11.6, 10.4 \text{ Hz}$ , 2H).  $^{13}\text{C NMR}$  (100 MHz,  $\text{CDCl}_3$ )  $\delta$  152.7, 150.1, 148.9, 146.3, 133.9, 124.5, 122.4, 122.3 (d,  $J = 2.5 \text{ Hz}$ ), 121.4, 117.1, 111.2 (d,  $J = 3.6 \text{ Hz}$ ), 111.0 (d,  $J = 3.6 \text{ Hz}$ ), 103.9, 103.6 (d,  $J = 3.3 \text{ Hz}$ ), 103.4, 77.4, 77.0, 76.7, 61.4, 58.6, 34.0, 33.5, 26.0, 25.6. HRMS (ESI)  $m/z$ :  $[\text{M}+\text{H}]^+$  calcd for  $\text{C}_{21}\text{H}_{19}\text{F}_2\text{N}_4\text{O}^+$  381.1521, found: 381.1517.

***N*-(3,5-Dimethylphenyl)-1,2,3,4,11a-hexahydro-6*H*-indolo[2,3-*b*]quinoxaline-6-carboxamide (4u)**

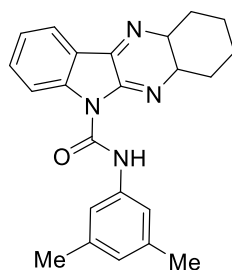

**4u**

Yellow solid, 74% yield, 276.2 mg, m.p. 176.1-178.3 °C, IR (KBr thin film):  $\nu = 3435, 1708, 1606, 1585 \text{ cm}^{-1}$ ;  $^1\text{H NMR}$  (400 MHz,  $\text{CDCl}_3$ )  $\delta$  11.49 (s, 1H), 8.43 (d,  $J = 8.0 \text{ Hz}$ , 1H), 7.76 (d,  $J = 7.6 \text{ Hz}$ , 1H), 7.47 (t,  $J = 7.6 \text{ Hz}$ , 1H), 7.18 (d,  $J = 8.0 \text{ Hz}$ , 3H), 6.75 (s, 1H), 3.70 – 2.79 (m, 2H), 2.50 (d,  $J = 13.6 \text{ Hz}$ , 1H), 2.32 (d,  $J = 4.0 \text{ Hz}$ , 7H), 1.93 (t,  $J = 11.2 \text{ Hz}$ , 2H), 1.66 – 1.55 (m, 2H), 1.46 (d,  $J = 8.8 \text{ Hz}$ , 2H).  $^{13}\text{C NMR}$  (100 MHz,  $\text{CDCl}_3$ )  $\delta$  152.9, 150.1, 148.9, 146.6, 138.7, 137.8, 133.8, 125.8, 124.2, 122.2, 121.2, 118.0, 117.8, 117.2, 61.2, 58.6, 34.2, 33.5, 26.0, 25.6, 21.5. HRMS (ESI)  $m/z$ :  $[\text{M}+\text{H}]^+$  calcd for  $\text{C}_{23}\text{H}_{25}\text{N}_4\text{O}^+$  373.2023, found: 373.2021.

***N*-Benzyl-1,2,3,4,4a,11a-hexahydro-6*H*-indolo[2,3-*b*]quinoxaline-6-carboxamide (4v)**

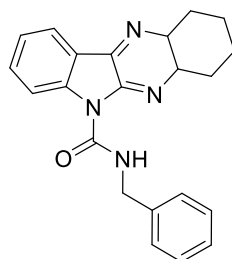

**4v**

Yellow solid, 85% yield, 305.3 mg, m.p. 150.9-151.6 °C, IR (KBr thin film):  $\nu = 3436, 1706, 1608, 1586 \text{ cm}^{-1}$ ;  $^1\text{H NMR}$  (400 MHz,  $\text{CDCl}_3$ )  $\delta$  9.77 (t,  $J = 5.6 \text{ Hz}$ , 1H), 8.40 (d,  $J = 8.4 \text{ Hz}$ , 1H), 7.75 (d,  $J = 6.4 \text{ Hz}$ , 1H), 7.46 (t,  $J = 8.4 \text{ Hz}$ , 1H), 7.37 (s, 2H), 7.35 (d,  $J = 3.2 \text{ Hz}$ , 2H), 7.30 – 7.25 (m, 1H), 7.14 (t,  $J = 7.6 \text{ Hz}$ , 1H), 4.60 (d,  $J = 5.6 \text{ Hz}$ , 2H), 3.54 – 2.69 (m, 2H), 2.47 (d,  $J = 13.2 \text{ Hz}$ , 1H), 2.22 (d,  $J = 13.2 \text{ Hz}$ , 1H), 1.96 – 1.81 (m, 2H), 1.50 (d,  $J = 13.6 \text{ Hz}$ , 2H), 1.41 (d,  $J = 10.4 \text{ Hz}$ , 2H).  $^{13}\text{C NMR}$  (100 MHz,  $\text{CDCl}_3$ )  $\delta$  153.02, 153.00, 149.1, 146.8, 138.5, 133.8, 128.7, 127.32, 127.3, 124.0, 122.2, 121.1, 117.0, 61.2, 58.6, 43.7, 34.2, 33.5, 26.0, 25.6. HRMS (ESI)  $m/z$ :  $[\text{M}+\text{H}]^+$  calcd for  $\text{C}_{22}\text{H}_{23}\text{N}_4\text{O}^+$  359.1866, found: 359.1861.

***N*-Phenethyl-1,2,3,4,4a,11a-hexahydro-6*H*-indolo[2,3-*b*]quinoxaline-6-carboxamide (4w)**

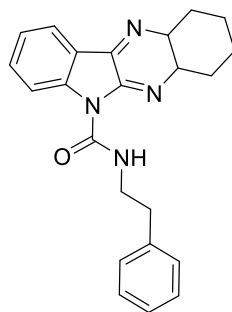

**4w**

Yellow solid, 84% yield, 313.4 mg, m.p. 157.6-159.4 °C, IR (KBr thin film):  $\nu = 3446, 1706, 1608, 1560 \text{ cm}^{-1}$ ;  $^1\text{H NMR}$  (400 MHz,  $\text{CDCl}_3$ )  $\delta$  9.31 (t,  $J = 5.6 \text{ Hz}$ , 1H), 8.38 (d,  $J = 8.4 \text{ Hz}$ , 1H), 7.74 (d,  $J = 6.4 \text{ Hz}$ , 1H), 7.46 (t,  $J = 8.0 \text{ Hz}$ , 1H), 7.35 – 7.28 (m, 2H), 7.28 – 7.22 (m, 3H), 7.14 (t,  $J = 7.6 \text{ Hz}$ , 1H), 3.72 – 3.60 (m, 2H), 3.09 (d,  $J = 5.6 \text{ Hz}$ , 2H), 2.92 (t,  $J = 7.2 \text{ Hz}$ , 2H), 2.46 (d,  $J = 13.6 \text{ Hz}$ , 1H), 2.13 (d,  $J = 8.8 \text{ Hz}$ , 1H), 1.90 (q,  $J = 10.4, 8.8 \text{ Hz}$ , 2H), 1.58 (t,  $J = 12.0 \text{ Hz}$ , 1H), 1.49 – 1.34 (m, 3H).  $^{13}\text{C NMR}$  (100 MHz,  $\text{CDCl}_3$ )  $\delta$  153.0, 148.9, 146.9, 139.1, 133.7, 128.9, 128.6, 126.4, 123.9, 122.2, 121.1, 117.0, 61.1, 58.6, 41.3, 35.9, 34.1, 33.5, 26.0, 25.6. HRMS (ESI)  $m/z$ :  $[\text{M}+\text{H}]^+$  calcd for  $\text{C}_{23}\text{H}_{25}\text{N}_4\text{O}^+$  373.2023, found: 373.2021.

***N*-Butyl-1,2,3,4,4a,11a-hexahydro-6*H*-indolo[2,3-*b*]quinoxaline-6-carboxamide (4x)**

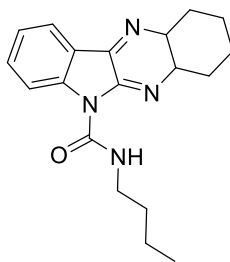

**4x**

Yellow solid, 77% yield, 250.4 mg, m.p. 154.1-155.7 °C, IR (KBr thin film):  $\nu = 3256, 1707, 1570, 1553 \text{ cm}^{-1}$ ;  $^1\text{H NMR}$  (400 MHz,  $\text{CDCl}_3$ )  $\delta$  9.32 (t,  $J = 5.6 \text{ Hz}$ , 1H), 8.38 (d,  $J = 8.4 \text{ Hz}$ , 1H), 7.74 (d,  $J = 6.4 \text{ Hz}$ , 1H), 7.46 (t,  $J = 7.2 \text{ Hz}$ , 1H), 7.13 (t,  $J = 7.2 \text{ Hz}$ , 1H), 3.45 – 3.32 (m, 2H), 3.23 – 3.08 (m, 2H), 2.48 (d,  $J = 13.2 \text{ Hz}$ , 1H), 2.27 (d,  $J = 12.8 \text{ Hz}$ , 1H), 1.98 – 1.85 (m, 2H), 1.59 (dt,  $J = 14.4, 7.2 \text{ Hz}$ , 4H), 1.43 (dt,  $J = 15.2, 8.0 \text{ Hz}$ , 4H), 0.96 (t,  $J = 7.2 \text{ Hz}$ , 3H).  $^{13}\text{C NMR}$  (100 MHz,  $\text{CDCl}_3$ )  $\delta$  153.1, 153.0, 149.1, 147.0, 133.7, 123.8, 122.1, 121.1, 117.0, 61.1, 58.6, 39.5, 34.2, 33.5, 31.56, 26.0, 25.6, 20.2, 13.8. HRMS (ESI)  $m/z$ :  $[\text{M}+\text{H}]^+$  calcd for  $\text{C}_{19}\text{H}_{25}\text{N}_4\text{O}^+$  325.2023, found: 325.2028.

**2,3-Diphenyl-*N*-(*p*-tolyl)-2,3-dihydro-5*H*-pyrazino[2,3-*b*]indole-5-carboxamide (4y)**

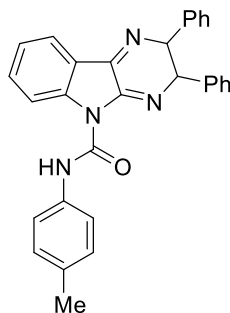

**4y**

Orange solid, 79% yield, 361.1 mg, m.p. 156.6-158.2 °C, IR (KBr thin film):  $\nu = 3446, 1715, 1608, 1559 \text{ cm}^{-1}$ ;  $^1\text{H NMR}$  (400 MHz,  $\text{CDCl}_3$ )  $\delta$  11.47 (s, 1H), 8.49 (d,  $J = 8.4 \text{ Hz}$ , 1H), 7.83 (d,  $J = 7.6 \text{ Hz}$ , 1H), 7.52 (t,  $J = 8.0 \text{ Hz}$ , 1H), 7.30 (q,  $J = 7.2, 6.4 \text{ Hz}$ , 8H), 7.19 (t,  $J = 7.6 \text{ Hz}$ , 1H), 7.06 (dd,  $J = 7.2, 5.2 \text{ Hz}$ , 6H), 5.14 – 4.54 (m, 2H), 2.27 (s, 3H).  $^{13}\text{C NMR}$  (100 MHz,  $\text{CDCl}_3$ )  $\delta$  152.0, 150.1, 148.3, 147.0, 141.4, 141.0, 135.1, 134.3, 133.6, 129.5, 128.5, 128.5, 128.4, 127.9, 127.8, 127.7, 124.4, 122.7, 121.1, 120.2, 117.4, 67.1, 64.3, 20.9. HRMS (ESI)  $m/z$ :  $[\text{M}+\text{H}]^+$  calcd for  $\text{C}_{30}\text{H}_{25}\text{N}_4\text{O}^+$  457.2023, found: 457.2027.

***N*-(4-Methoxyphenyl)-2,3-diphenyl-2,3-dihydro-5*H*-pyrazino[2,3-*b*]indole-5-carboxamide (4z)**

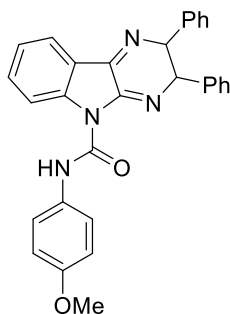

**4z**

Orange solid, 74% yield, 350.2 mg, m.p. 110.3-112.0 °C, IR (KBr thin film):  $\nu = 3435, 1709, 1608, 1513 \text{ cm}^{-1}$ ;  $^1\text{H NMR}$  (400 MHz,  $\text{CDCl}_3$ )  $\delta$  11.39 (s, 1H), 8.50 (d,  $J = 8.4 \text{ Hz}$ , 1H), 7.85 (d,  $J = 7.6 \text{ Hz}$ , 1H), 7.60 – 7.46 (m, 2H), 7.38 – 7.28 (m, 8H), 7.12 – 7.02 (m, 4H), 6.82 (d,  $J = 9.2 \text{ Hz}$ , 2H), 5.28 – 4.67 (m, 2H), 3.76 (s, 3H).  $^{13}\text{C NMR}$  (100 MHz,  $\text{CDCl}_3$ )  $\delta$  156.3, 151.9, 150.3, 148.3, 147.0, 141.5, 141.0, 134.3, 130.7, 128.6, 128.4, 127.9, 127.8, 127.7, 127.7, 124.4, 122.8, 121.9, 121.9, 121.1, 117.3, 114.21, 114.20, 67.1, 64.3, 55.5. HRMS (ESI)  $m/z$ :  $[\text{M}+\text{H}]^+$  calcd for  $\text{C}_{30}\text{H}_{25}\text{N}_4\text{O}_2^+$  473.1972, found: 473.1979.

***N*-(4-Fluorophenyl)-2,3-diphenyl-2,3-dihydro-5*H*-pyrazino[2,3-*b*]indole-5-carboxamide (4a')**

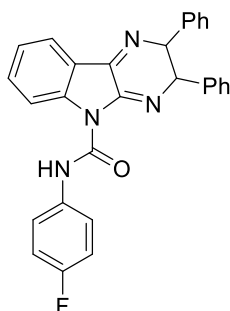

**4a'**

Orange solid, 67% yield, 309.0 mg, m.p. 124.3-126.1 °C, IR (KBr thin film):  $\nu = 3435, 1713, 1608, 1510$ ;  $^1\text{H NMR}$  (400 MHz,  $\text{CDCl}_3$ )  $\delta$  11.54 (s, 1H), 8.49 (d,  $J = 8.4 \text{ Hz}$ , 1H), 7.85 (d,  $J = 7.6 \text{ Hz}$ , 1H), 7.55 (t,  $J = 7.6 \text{ Hz}$ , 1H), 7.39 (dd,  $J = 8.8, 4.8 \text{ Hz}$ , 2H), 7.30 (d,  $J = 3.2 \text{ Hz}$ , 5H), 7.22 (t,  $J = 7.6 \text{ Hz}$ , 1H), 7.08 (dd,  $J = 6.8, 3.2 \text{ Hz}$ , 3H), 6.96 (t,  $J = 8.4 \text{ Hz}$ , 2H), 4.90 (q,  $J = 12.8 \text{ Hz}$ , 2H).  $^{13}\text{C NMR}$  (100 MHz,  $\text{CDCl}_3$ )  $\delta$  159.3 (d,  $J = 241.3 \text{ Hz}$ ), 151.9, 150.2, 148.3, 146.8, 141.4, 140.9, 134.4, 133.7 (d,  $J = 2.4 \text{ Hz}$ ), 128.6, 128.5, 128.4, 127.9, 127.8, 124.6, 122.9, 121.9, 121.8, 121.1, 117.3, 115.8, 115.5, 67.1, 64.3. HRMS (ESI)  $m/z$ :  $[\text{M}+\text{H}]^+$  calcd for  $\text{C}_{29}\text{H}_{22}\text{FN}_4\text{O}^+$  461.1772, found: 461.1776.

***N*-(4-Chlorophenyl)-2,3-diphenyl-2,3-dihydro-5*H*-pyrazino[2,3-*b*]indole-5-carboxamide (4b')**

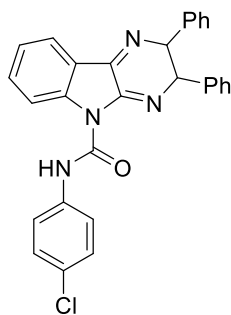

**4b'**

Orange solid, 70% yield, 334.0 mg, m.p. 176.5-177.9 °C, IR (KBr thin film):  $\nu = 3430, 1715, 1607, 1559 \text{ cm}^{-1}$ ;  $^1\text{H NMR}$  (400 MHz,  $\text{CDCl}_3$ )  $\delta$  11.62 (s, 1H), 8.47 (d,  $J = 8.4 \text{ Hz}$ , 1H), 7.84 (d,  $J = 7.6 \text{ Hz}$ , 1H), 7.58 – 7.50 (m, 1H), 7.37 (d,  $J = 8.8 \text{ Hz}$ , 2H), 7.30 (d,  $J = 2.0 \text{ Hz}$ , 5H), 7.25 – 7.18 (m, 3H), 7.13 – 6.92 (m, 4H), 5.12 – 4.65 (m, 2H).  $^{13}\text{C NMR}$  (100 MHz,  $\text{CDCl}_3$ )  $\delta$  151.8, 149.9, 148.2, 146.7, 141.3, 140.9, 136.4, 134.3, 129.0, 128.9, 128.6, 128.4, 128.4, 127.9, 127.8, 127.8, 124.7, 122.9, 121.2, 121.1, 117.3, 67.1, 64.2. HRMS (ESI)  $m/z$ :  $[\text{M}+\text{H}]^+$  calcd for  $\text{C}_{29}\text{H}_{22}\text{ClN}_4\text{O}^+$  477.1477, found: 477.1472.

**2,3-Diphenyl-*N*-(*m*-tolyl)-2,3-dihydro-5H-pyrazino[2,3-*b*]indole-5-carboxamide (4c')**

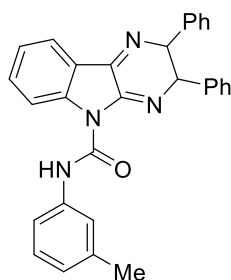

**4c'**

Orange solid, 70% yield, 320.0 mg, m.p. 160.2-161.8 °C, IR (KBr thin film):  $\nu = 3435, 1706, 1597, 1575 \text{ cm}^{-1}$ ;  $^1\text{H NMR}$  (400 MHz,  $\text{CDCl}_3$ )  $\delta$  11.51 (s, 1H), 8.51 (d,  $J = 8.4 \text{ Hz}$ , 1H), 7.85 (d,  $J = 7.6 \text{ Hz}$ , 1H), 7.59 – 7.44 (m, 2H), 7.42 – 7.28 (m, 7H), 7.22 – 6.87 (m, 8H), 5.46 – 4.44 (m, 2H), 2.30 (s, 3H).  $^{13}\text{C NMR}$  (100 MHz,  $\text{CDCl}_3$ )  $\delta$  156.3, 152.0, 150.3, 148.3, 147.0, 141.5, 141.0, 134.3, 130.7, 128.6, 128.4, 127.9, 127.8, 127.7, 124.4, 122.8, 122.0, 121.1, 117.4, 114.2, 67.1, 64.3, 55.5. HRMS (ESI)  $m/z$ :  $[\text{M}+\text{H}]^+$  calcd for  $\text{C}_{30}\text{H}_{25}\text{N}_4\text{O}^+$  457.2023, found: 457.2027.

***N*-(3-Fluorophenyl)-2,3-diphenyl-2,3-dihydro-5H-pyrazino[2,3-*b*]indole-5-carboxamide (4d')**

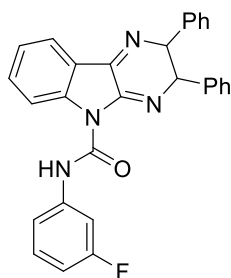

**4d'**



Orange solid, 69% yield, 318.2 mg, m.p. 116.9-118.4 °C, IR (KBr thin film):  $\nu = 3435, 1715, 1608, 1570 \text{ cm}^{-1}$ ;  $^1\text{H NMR}$  (400 MHz,  $\text{CDCl}_3$ )  $\delta$  11.72 (s, 1H), 8.50 (d,  $J = 8.4 \text{ Hz}$ , 1H), 7.87 (d,  $J = 7.6 \text{ Hz}$ , 1H), 7.57 (t,  $J = 8.8 \text{ Hz}$ , 1H), 7.46 (dt,  $J = 11.2, 2.4 \text{ Hz}$ , 1H), 7.34 – 7.28 (m, 6H), 7.26 – 7.15 (m, 3H), 7.08 (td,  $J = 7.6, 3.6 \text{ Hz}$ , 4H), 7.01 (dd,  $J = 8.0, 2.0 \text{ Hz}$ , 1H), 5.06 – 4.69 (m, 2H).  $^{13}\text{C NMR}$  (100 MHz,  $\text{CDCl}_3$ )  $\delta$  164.3, 161.8, 151.8, 149.9, 148.3, 146.7, 141.3, 140.9, 139.4, 139.3, 134.4, 130.1, 130.0, 128.6, 128.5, 128.4, 128.3, 128.2, 128.1, 127.9, 127.82, 127.80, 127.7, 124.7, 122.9, 121.1, 117.4, 115.4, 115.3, 110.8, 110.6, 107.6, 107.3, 77.4, 77.1, 76.7, 67.0, 64.2. HRMS (ESI)  $m/z$ :  $[\text{M}+\text{H}]^+$  calcd for  $\text{C}_{29}\text{H}_{22}\text{FN}_4\text{O}^+$  461.1772, found: 461.1776.

***N*-(3,5-Dimethylphenyl)-2,3-diphenyl-2,3-dihydro-5H-pyrazino[2,3-*b*]indole-5-carboxamide (4e')**

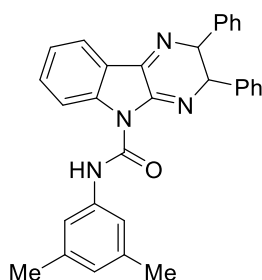

**4e'**

Orange solid, 84% yield, 395.8 mg, m.p. 180.6-182.4 °C, IR (KBr thin film):  $\nu = 3446, 1711, 1610, 1583 \text{ cm}^{-1}$ ;  $^1\text{H NMR}$  (400 MHz,  $\text{CDCl}_3$ )  $\delta$  11.45 (s, 1H), 8.50 (d,  $J = 8.4 \text{ Hz}$ , 1H), 7.84 (d,  $J = 7.6 \text{ Hz}$ , 1H), 7.53 (t,  $J = 8.0 \text{ Hz}$ , 1H), 7.30 (p,  $J = 3.2 \text{ Hz}$ , 6H), 7.20 (t,  $J = 7.6 \text{ Hz}$ , 1H), 7.16 – 6.81 (m, 6H), 6.71 (s, 1H), 5.49 – 4.76 (m, 2H), 2.24 (s, 6H).  $^{13}\text{C NMR}$  (100 MHz,  $\text{CDCl}_3$ )  $\delta$  151.9, 150.1, 148.3, 146.9, 141.4, 141.0, 138.7, 137.5, 134.3, 128.6, 128.4, 128.3, 127.9, 127.8, 127.7, 125.8, 124.4, 122.8, 121.1, 118.0, 117.4, 67.0, 64.1, 21.4. HRMS (ESI)  $m/z$ :  $[\text{M}+\text{H}]^+$  calcd for  $\text{C}_{31}\text{H}_{27}\text{N}_4\text{O}^+$  471.2179, found: 471.2184.

***N*-Benzyl-2,3-diphenyl-2,3-dihydro-5H-pyrazino[2,3-*b*]indole-5-carboxamide (4f')**

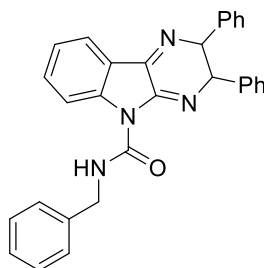

**4f'**

Orange solid, 73% yield, 333.8 mg, m.p. 83.4-85.6 °C, IR (KBr thin film):  $\nu = 3435, 1693, 1606, 1542 \text{ cm}^{-1}$ ;  $^1\text{H NMR}$  (400 MHz,  $\text{CDCl}_3$ )  $\delta$  9.76 (s, 1H), 8.45 (d,  $J = 8.4 \text{ Hz}$ , 1H), 7.82 (d,  $J = 7.6 \text{ Hz}$ , 1H), 7.50 (d,  $J = 7.2 \text{ Hz}$ , 1H), 7.34 – 7.15 (m, 11H), 7.02 (ddd,  $J = 26.4, 7.6, 3.2 \text{ Hz}$ , 4H), 4.83 (s, 2H), 4.63 (dd,  $J = 15.2, 6.4 \text{ Hz}$ , 1H), 4.46 (dd,  $J = 15.2, 5.2 \text{ Hz}$ , 1H).  $^{13}\text{C NMR}$  (100 MHz,  $\text{CDCl}_3$ )  $\delta$  152.9, 152.0, 148.3, 147.1, 141.6, 141.1, 138.3, 134.2, 128.6, 128.5, 128.4, 128.3, 128.0, 127.8, 127.5, 127.3, 127.2, 124.2, 122.7, 121.0, 117.2, 66.9, 64.3, 43.7. HRMS (ESI)  $m/z$ :  $[\text{M}+\text{H}]^+$  calcd for  $\text{C}_{30}\text{H}_{25}\text{N}_4\text{O}^+$  457.2023, found: 457.2027.

***N*-Phenethyl-2,3-diphenyl-2,3-dihydro-5*H*-pyrazino[2,3-*b*]indole-5-carboxamide (4g')**

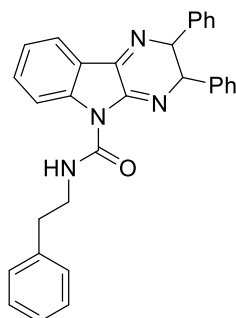

**4g'**

Orange solid, 82% yield, 386.4 mg, m.p. 70.6-72.4 °C, IR (KBr thin film):  $\nu = 3446, 1704, 1607, 1544 \text{ cm}^{-1}$ ;  $^1\text{H NMR}$  (400 MHz,  $\text{CDCl}_3$ )  $\delta$  9.28 (t,  $J = 5.4 \text{ Hz}$ , 1H), 8.45 (d,  $J = 8.4 \text{ Hz}$ , 1H), 7.80 (d,  $J = 7.6 \text{ Hz}$ , 1H), 7.50 (t,  $J = 8.4 \text{ Hz}$ , 1H), 7.28 (p,  $J = 2.4 \text{ Hz}$ , 6H), 7.16 (t,  $J = 7.6 \text{ Hz}$ , 1H), 7.10 (t,  $J = 3.6 \text{ Hz}$ , 5H), 7.03 (dd,  $J = 6.4, 2.8 \text{ Hz}$ , 2H), 6.99 – 6.92 (m, 2H), 4.79 (d,  $J = 2.8 \text{ Hz}$ , 2H), 3.66 (dd,  $J = 13.2, 6.4 \text{ Hz}$ , 1H), 3.53 (dd,  $J = 13.2, 5.6 \text{ Hz}$ , 1H), 2.83 (p,  $J = 7.2 \text{ Hz}$ , 2H).  $^{13}\text{C NMR}$  (100 MHz,  $\text{CDCl}_3$ )  $\delta$  152.9, 151.9, 148.3, 147.1, 141.7, 141.2, 138.9, 134.2, 128.8, 128.5, 128.5, 128.4, 128.3, 128.0, 127.8, 127.6, 126.3, 124.2, 122.7, 121.0, 117.2, 66.9, 64.3, 41.5, 35.7. HRMS (ESI)  $m/z$ :  $[\text{M}+\text{H}]^+$  calcd for  $\text{C}_{31}\text{H}_{27}\text{N}_4\text{O}^+$  471.2179, found: 471.2184.

***N*-Butyl-2,3-diphenyl-2,3-dihydro-5*H*-pyrazino[2,3-*b*]indole-5-carboxamide (4h')**

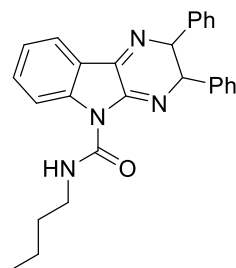

**4h'**

Orange solid, 76% yield, 321.6 mg, m.p. 83.7-84.9 °C, IR (KBr thin film):  $\nu = 3446, 1699, 1607, 1556 \text{ cm}^{-1}$ ;  $^1\text{H NMR}$  (400 MHz,  $\text{CDCl}_3$ )  $\delta$  9.29 (s, 1H), 8.45 (d,  $J = 8.4 \text{ Hz}$ , 1H), 7.81 (d,  $J = 6.4 \text{ Hz}$ , 1H), 7.54 – 7.44 (m, 1H), 7.28 (td,  $J = 6.0, 5.2, 2.4 \text{ Hz}$ , 6H), 7.17 (t,  $J = 7.6 \text{ Hz}$ , 1H), 7.11 – 6.97 (m, 4H), 4.83 (d,  $J = 2.8 \text{ Hz}$ , 2H), 3.39 (dt,  $J = 13.2, 6.4 \text{ Hz}$ , 1H), 3.33 – 3.18 (m, 1H), 1.50 (td,  $J = 7.2, 4.0 \text{ Hz}$ , 2H), 1.33 – 1.26 (m, 2H), 0.85 (d,  $J = 7.2 \text{ Hz}$ , 3H).  $^{13}\text{C NMR}$  (100 MHz,  $\text{CDCl}_3$ )  $\delta$  152.9, 152.1, 148.3, 147.2, 141.8, 141.2, 134.2, 128.5, 128.4, 128.3, 128.0, 127.7, 127.5, 124.1, 122.7, 121.0, 117.2, 66.9, 64.3, 39.6, 31.5, 20.1, 13.7. HRMS (ESI)  $m/z$ :  $[\text{M}+\text{H}]^+$  calcd for  $\text{C}_{27}\text{H}_{27}\text{N}_4\text{O}^+$  423.2179, found: 423.2184.

***N*-(4-Methoxyphenyl)-2,3-dihydro-5*H*-pyrazino[2,3-*b*]indole-5-carboxamide (4i')**

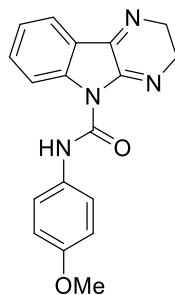

**4i'**

Yellow solid, 72% yield, 231.2 mg, m.p. 115.7-116.3 °C, IR (KBr thin film):  $\nu = 3436, 1698, 1605, 1569 \text{ cm}^{-1}$ ;  $^1\text{H NMR}$  (400 MHz,  $\text{CDCl}_3$ )  $\delta$  11.23 (s, 1H), 8.45 (d,  $J = 8.0 \text{ Hz}$ , 1H), 7.74 (d,  $J = 8.0 \text{ Hz}$ , 1H), 7.52 – 7.47 (m, 3H), 7.19 (t,  $J = 7.2 \text{ Hz}$ , 1H), 6.90 (d,  $J = 8.4 \text{ Hz}$ , 1H), 3.96 – 3.92 (m, 2H), 3.83 – 3.81 (m, 5H).  $^{13}\text{C NMR}$  (100 MHz,  $\text{CDCl}_3$ )  $\delta$  156.4, 152.7, 150.5, 148.6, 146.4, 133.9, 130.8, 124.2, 122.3, 122.1, 121.4, 117.2, 114.2, 55.5, 45.3, 42.5. HRMS (ESI)  $m/z$ :  $[\text{M}+\text{H}]^+$  calcd for  $\text{C}_{18}\text{H}_{17}\text{N}_4\text{O}_2^+$  321.1346, found: 321.1341.

***N*-(4-Chlorophenyl)-2,3-dihydro-5H-pyrazino[2,3-*b*]indole-5-carboxamide (4j')**

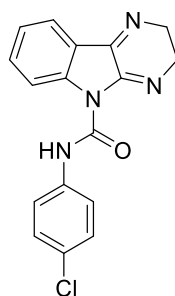

**4j'**

Yellow solid, 61% yield, 198.3 mg, m.p. 157.8-159.1 °C, IR (KBr thin film):  $\nu = 3446, 1699, 1604, 1561 \text{ cm}^{-1}$ ;  $^1\text{H NMR}$  (400 MHz,  $\text{CDCl}_3$ )  $\delta$  11.43 (s, 1H), 8.37 (d,  $J = 8.0 \text{ Hz}$ , 1H), 7.70 (d,  $J = 7.6 \text{ Hz}$ , 1H), 7.49 (t,  $J = 8.0 \text{ Hz}$ , 3H), 7.28 (s, 2H), 7.16 (t,  $J = 7.6 \text{ Hz}$ , 1H), 3.92 (t,  $J = 8.4 \text{ Hz}$ , 2H), 3.85 – 3.68 (m, 2H).  $^{13}\text{C NMR}$  (100 MHz,  $\text{CDCl}_3$ )  $\delta$  152.4, 150.0, 148.4, 136.5, 133.9, 129.0, 128.9, 124.4, 122.1, 121.4, 121.3, 117.1, 45.2, 42.4. HRMS (ESI)  $m/z$ :  $[\text{M}+\text{H}]^+$  calcd for  $\text{C}_{17}\text{H}_{14}\text{ClN}_4\text{O}^+$  325.0851, found: 325.0855.

***N*-(*m*-Tolyl)-2,3-dihydro-5H-pyrazino[2,3-*b*]indole-5-carboxamide (4k')**

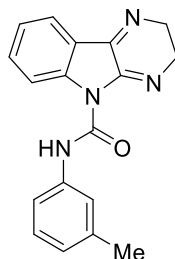

**4k'**

Yellow solid, 62% yield, 189.18 mg, m.p. 135.4-137.2 °C, IR (KBr thin film):  $\nu = 3326, 1705, 1598, 1566 \text{ cm}^{-1}$ ;  $^1\text{H NMR}$  (400 MHz,  $\text{CDCl}_3$ )  $\delta$  11.34 (s, 1H), 8.42 (d,  $J = 8.4 \text{ Hz}$ , 1H), 7.72 (dd,  $J = 7.6,$

1.2 Hz, 1H), 7.48 (t,  $J = 7.2$  Hz, 1H), 7.41 (s, 1H), 7.35 (d,  $J = 8.8$  Hz, 1H), 7.22 (t,  $J = 7.6$  Hz, 1H), 7.17 (t,  $J = 7.2$  Hz, 1H), 6.92 (d,  $J = 7.6$  Hz, 1H), 3.97 – 3.87 (m, 2H), 3.84 – 3.73 (m, 2H), 2.36 (s, 3H).  $^{13}\text{C}$  NMR (100 MHz,  $\text{CDCl}_3$ )  $\delta$  152.6, 150.1, 148.5, 146.2, 138.9, 137.7, 133.9, 128.8, 124.9, 124.2, 122.1, 121.4, 120.9, 117.4, 117.2, 45.2, 42.4, 21.6. HRMS (ESI)  $m/z$ :  $[\text{M}+\text{H}]^+$  calcd for  $\text{C}_{18}\text{H}_{17}\text{N}_4\text{O}^+$  305.1397, found: 305.1394.

***N*-(3,5-Dimethylphenyl)-2,3-dihydro-5*H*-pyrazino[2,3-*b*]indole-5-carboxamide (41')**

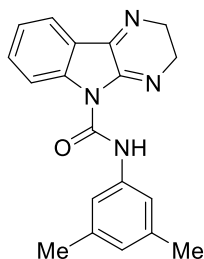

**41'**

Yellow solid, 73% yield, 233.0 mg, m.p. 109.5-111.3 °C, IR (KBr thin film):  $\nu = 3435, 1690, 1601, 1573$   $\text{cm}^{-1}$ ;  $^1\text{H}$  NMR (400 MHz,  $\text{CDCl}_3$ )  $\delta$  11.29 (s, 1H), 8.43 (d,  $J = 8.4$  Hz, 1H), 7.72 (d,  $J = 7.6$  Hz, 1H), 7.48 (t,  $J = 8.0$  Hz, 1H), 7.18 (d,  $J = 13.2$  Hz, 3H), 6.75 (s, 1H), 3.92 (t,  $J = 9.2$  Hz, 2H), 3.81 (t,  $J = 8.0$  Hz, 2H), 2.32 (s, 6H).  $^{13}\text{C}$  NMR (100 MHz,  $\text{CDCl}_3$ )  $\delta$  152.6, 150.1, 148.5, 146.3, 138.7, 137.6, 133.9, 125.8, 124.2, 122.0, 121.4, 118.0, 117.2, 45.3, 42.5, 21.4. HRMS (ESI)  $m/z$ :  $[\text{M}+\text{H}]^+$  calcd for  $\text{C}_{19}\text{H}_{19}\text{N}_4\text{O}^+$  319.1553, found: 319.1557.

**2-Methyl-*N*-(*p*-tolyl)-2,3-dihydro-5*H*-pyrazino[2,3-*b*]indole-5-carboxamide (4m'-a) and 3-methyl-*N*-(*p*-tolyl)-2,3-dihydro-5*H*-pyrazino[2,3-*b*]indole-5-carboxamide (4m'-b)**

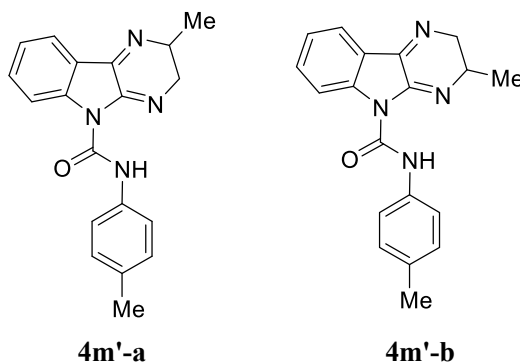

**4m'-a**

**4m'-b**

Yellow solid, 69% yield, 220.2 mg, **4m'-a:4m'-b** = 1:5.6 (the isomer ratio was determined by  $^1\text{H}$  NMR); The isolated product was an inseparable mixture of isomers, m.p. 113.7-115.4 °C, IR (KBr thin film):  $\nu = 3436, 1708, 1608, 1561$   $\text{cm}^{-1}$ ;  $^1\text{H}$  NMR (400 MHz,  $\text{CDCl}_3$ )  $\delta$  11.48 and 11.33 (s, 1H), 8.44 (d,  $J = 8.4$  Hz, 1H), 7.73 (d,  $J = 7.6$  Hz, 1H), 7.52 – 7.42 (m, 3H), 7.17 (dd,  $J = 14.4, 7.6$  Hz, 3H), 4.09 (dd,  $J = 17.6, 7.2$  Hz, 1H), 3.91 (dd,  $J = 12.8, 6.4$  Hz, 1H), 3.56 (dd,  $J = 17.6, 12.4$  Hz, 1H), 2.33 (s, 3H), 1.43 (dd,  $J = 13.2, 6.8$  Hz, 3H).  $^{13}\text{C}$  NMR (100 MHz,  $\text{CDCl}_3$ )  $\delta$  152.3, 150.2, 148.2, 146.4, 135.3, 133.9, 133.6, 129.6, 124.2, 122.1, 121.3, 120.4, 120.3, 120.3, 117.2, 52.1, 48.1, 20.9, 20.6. HRMS (ESI)  $m/z$ :  $[\text{M}+\text{H}]^+$  calcd for  $\text{C}_{19}\text{H}_{19}\text{N}_4\text{O}^+$  319.1553, found: 319.1557.

**2-Methyl-*N*-phenethyl-2,3-dihydro-5*H*-pyrazino[2,3-*b*]indole-5-carboxamide (4n'-a) and 3-methyl-*N*-phenethyl-2,3-dihydro-5*H*-pyrazino[2,3-*b*]indole-5-carboxamide (4n'-b)**

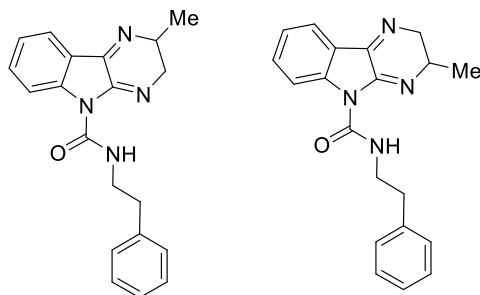

**4n'-a**

**4n'-b**

Orange solid, 72% yield, 240.0 mg, **4n'-a**:**4n'-b** = 2:1 (the isomer ratio was determined by  $^1\text{H}$  NMR); The isolated product was an inseparable mixture of isomers, m.p. 135.5-137.7 °C, IR (KBr thin film):  $\nu = 3400, 1691, 1588, 1554\text{ cm}^{-1}$ ;  $^1\text{H}$  NMR (400 MHz,  $\text{CDCl}_3$ )  $\delta$  9.32 and 9.26 (s, 1H), 8.37 (d,  $J = 8.4\text{ Hz}$ , 1H), 7.71 (dd,  $J = 13.2, 7.6\text{ Hz}$ , 1H), 7.46 (t,  $J = 8.0\text{ Hz}$ , 1H), 7.34 – 7.29 (m, 2H), 7.28 – 7.23 (m, 3H), 7.14 (t,  $J = 7.6\text{ Hz}$ , 1H), 4.02 – 3.83 (m, 1H), 3.76 – 3.61 (m, 3H), 3.52 – 3.29 (m, 1H), 2.92 (t,  $J = 7.2\text{ Hz}$ , 2H), 1.40 and 1.22 (d,  $J = 6.8\text{ Hz}$ , 3H).  $^{13}\text{C}$  NMR (100 MHz,  $\text{CDCl}_3$ )  $\delta$  153.0, 152.9, 152.3, 151.9, 148.3, 148.1, 146.7, 146.6, 139.1, 139.1, 133.8, 129.0, 128.9, 128.6, 128.5, 126.4, 123.9, 122.1, 122.0, 121.23, 121.20, 117.0, 116.9, 52.0, 50.2, 48.9, 47.9, 41.5, 41.2, 36.0, 35.9, 20.4, 19.8. HRMS (ESI) m/z:  $[\text{M}+\text{H}]^+$  calcd for  $\text{C}_{20}\text{H}_{21}\text{N}_4\text{O}^+$  333.1710, found: 333.1716.

**8-Methyl-N-phenethyl-1,2,3,4,4a,11a-hexahydro-6H-indolo[2,3-b]quinoxaline-6-carboxamide (4o')**

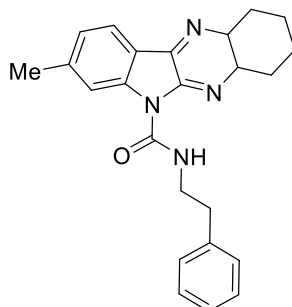

**4o'**

Green solid, 83% yield, 321.4 mg, m.p. 84.9-86.6 °C, IR (KBr thin film):  $\nu = 3218, 1693, 1609, 1535\text{ cm}^{-1}$ ;  $^1\text{H}$  NMR (400 MHz,  $\text{CDCl}_3$ )  $\delta$  9.42 and 9.33 (t,  $J = 5.6\text{ Hz}$ , 1H), 8.24 (s, 1H), 7.62 (d,  $J = 7.6\text{ Hz}$ , 1H), 7.35 – 7.12 (m, 5H), 6.95 (d,  $J = 7.6\text{ Hz}$ , 1H), 3.87 – 3.73 and 3.14 – 3.00 (m, 2H), 3.73 – 3.42 (m, 2H), 2.91 (t,  $J = 7.2\text{ Hz}$ , 4H), 2.46 and 2.41 (s, 3H), 2.12 (d,  $J = 9.2\text{ Hz}$ , 1H), 1.97 – 1.76 (m, 2H), 1.63 – 1.33 (m, 4H).  $^{13}\text{C}$  NMR (100 MHz,  $\text{CDCl}_3$ )  $\delta$  153.1, 149.4, 147.0, 145.0, 139.2, 128.8, 128.6, 126.4, 124.8, 121.9, 118.6, 117.6, 60.9, 58.7, 41.3, 35.9, 34.1, 33.6, 26.0, 25.6, 22.6. HRMS (ESI) m/z:  $[\text{M}+\text{H}]^+$  calcd for  $\text{C}_{24}\text{H}_{27}\text{N}_4\text{O}^+$  387.2179, found: 387.2185.

**9-Chloro-N-phenethyl-1,2,3,4,4a,11a-hexahydro-6H-indolo[2,3-b]quinoxaline-6-carboxamide (4p')**

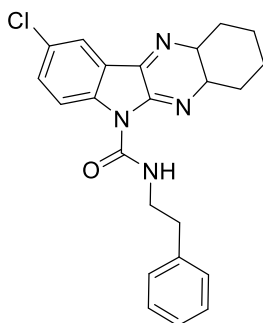

**4p'**

Green solid, 70% yield, 321.4 mg, m.p. 83.2-84.7 °C, IR (KBr thin film):  $\nu = 3218, 1693, 1609, 1535 \text{ cm}^{-1}$ ;  $^1\text{H NMR}$  (400 MHz,  $\text{CDCl}_3$ )  $\delta$  9.29 and 9.19 (t,  $J = 5.6 \text{ Hz}$ , 1H), 8.31 (d,  $J = 8.8 \text{ Hz}$ , 1H), 7.69 (d,  $J = 2.4 \text{ Hz}$ , 1H), 7.39 (dd,  $J = 8.8, 2.4 \text{ Hz}$ , 1H), 7.35 – 7.26 (m, 2H), 7.28 – 7.19 (m, 3H), 3.89 – 3.79 and 3.19 – 3.02 (m, 2H), 3.74 – 3.54 (m, 2H), 2.90 (t,  $J = 6.8 \text{ Hz}$ , 2H), 2.50 – 2.40 and 2.21 – 2.06 and 2.00 – 1.79 (m, 3H), 1.63 – 1.34 (m, 5H).  $^{13}\text{C NMR}$  (100 MHz,  $\text{CDCl}_3$ )  $\delta$  152.6, 152.0, 148.5, 145.2, 139.0, 133.2, 129.5, 128.8, 128.6, 128.6, 126.5, 122.6, 122.0, 118.1, 77.4, 77.1, 76.8, 61.2, 58.6, 41.3, 35.8, 34.5, 33.4, 25.9, 25.6. HRMS (ESI)  $m/z$ :  $[\text{M}+\text{H}]^+$  calcd for  $\text{C}_{23}\text{H}_{24}\text{ClN}_4\text{O}^+$  407.1633, found: 407.1638.

***N*-Phenethyl-1,2,3,4-tetrahydro-6*H*-indolo[2,3-*b*]quinoxaline-6-carboxamide (5w)**

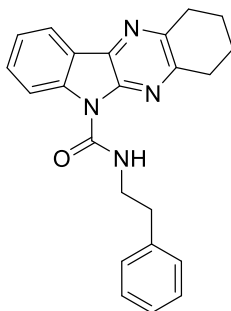

**5w**

Yellow solid, 93% yield, 345.2 mg, m.p. 121.2-122.4 °C;  $^1\text{H NMR}$  (400 MHz,  $\text{CDCl}_3$ )  $\delta$  9.53 (t,  $J = 5.6 \text{ Hz}$ , 1H), 8.74 (d,  $J = 8.4 \text{ Hz}$ , 1H), 8.19 (d,  $J = 7.6 \text{ Hz}$ , 1H), 7.58 (t,  $J = 8.0 \text{ Hz}$ , 1H), 7.39 (t,  $J = 7.6 \text{ Hz}$ , 1H), 7.31 (d,  $J = 5.6 \text{ Hz}$ , 4H), 7.27 – 7.23 (m, 1H), 3.84 (q,  $J = 6.4 \text{ Hz}$ , 2H), 3.11 (t,  $J = 6.0 \text{ Hz}$ , 2H), 3.01 (t,  $J = 6.8 \text{ Hz}$ , 2H), 2.85 (t,  $J = 6.0 \text{ Hz}$ , 2H), 1.96 (d,  $J = 6.0 \text{ Hz}$ , 4H).  $^{13}\text{C NMR}$  (100 MHz,  $\text{CDCl}_3$ )  $\delta$  153.0, 147.5, 146.8, 142.3, 139.8, 139.1, 136.1, 129.9, 128.9, 128.6, 126.5, 123.4, 121.1, 120.4, 116.9, 41.4, 35.9, 32.3, 32.0, 22.9, 22.6. HRMS (ESI)  $m/z$ :  $[\text{M}+\text{H}]^+$  calcd for  $\text{C}_{23}\text{H}_{23}\text{N}_4\text{O}^+$  371.1866, found: 371.1861.

## 5. $^1\text{H}$ NMR and $^{13}\text{C}$ NMR spectra of products

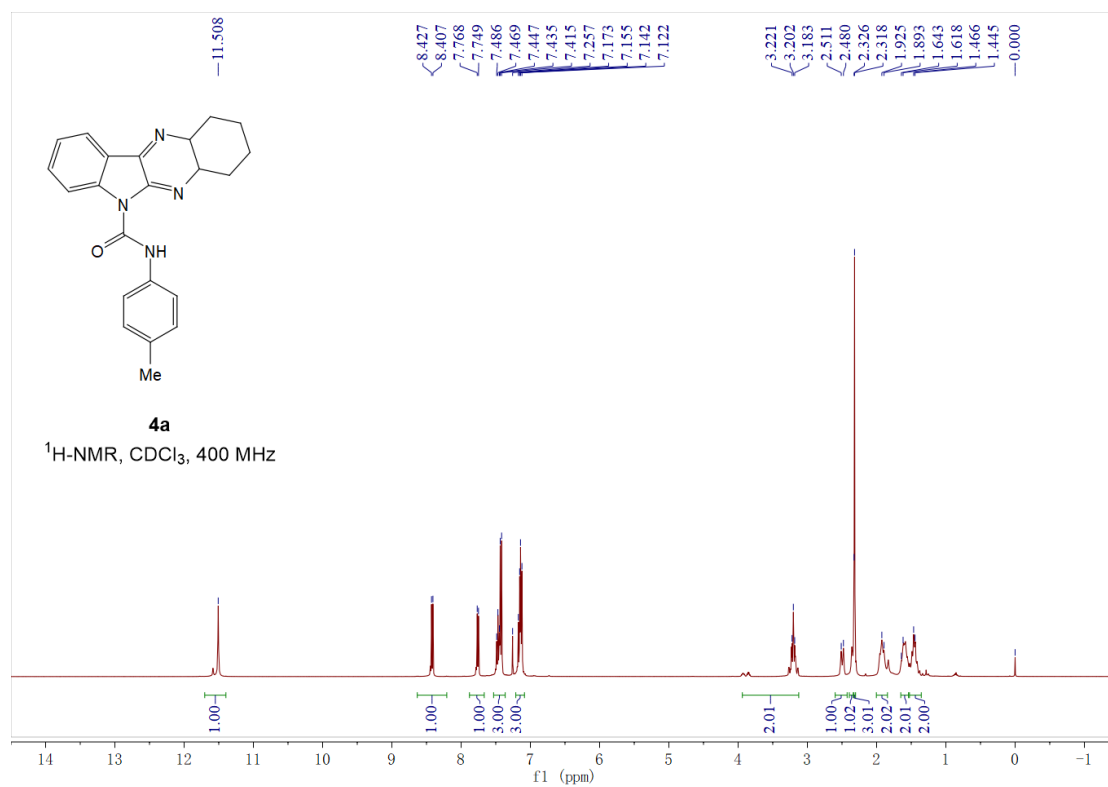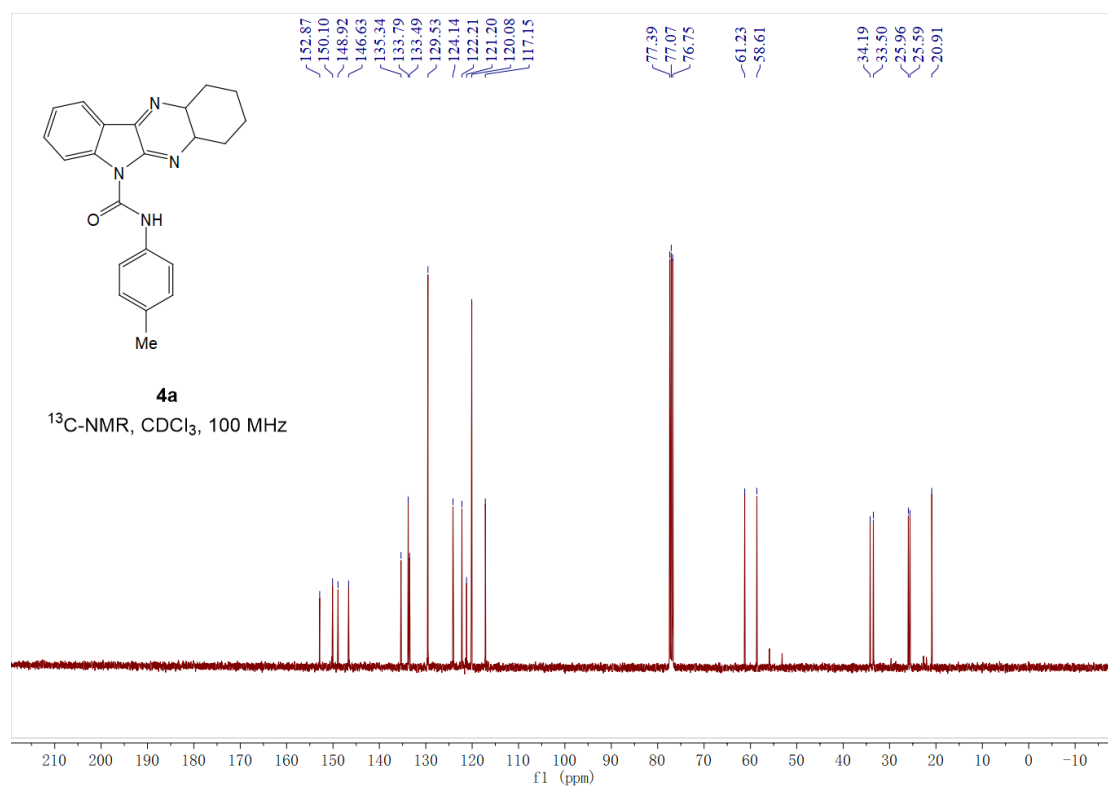

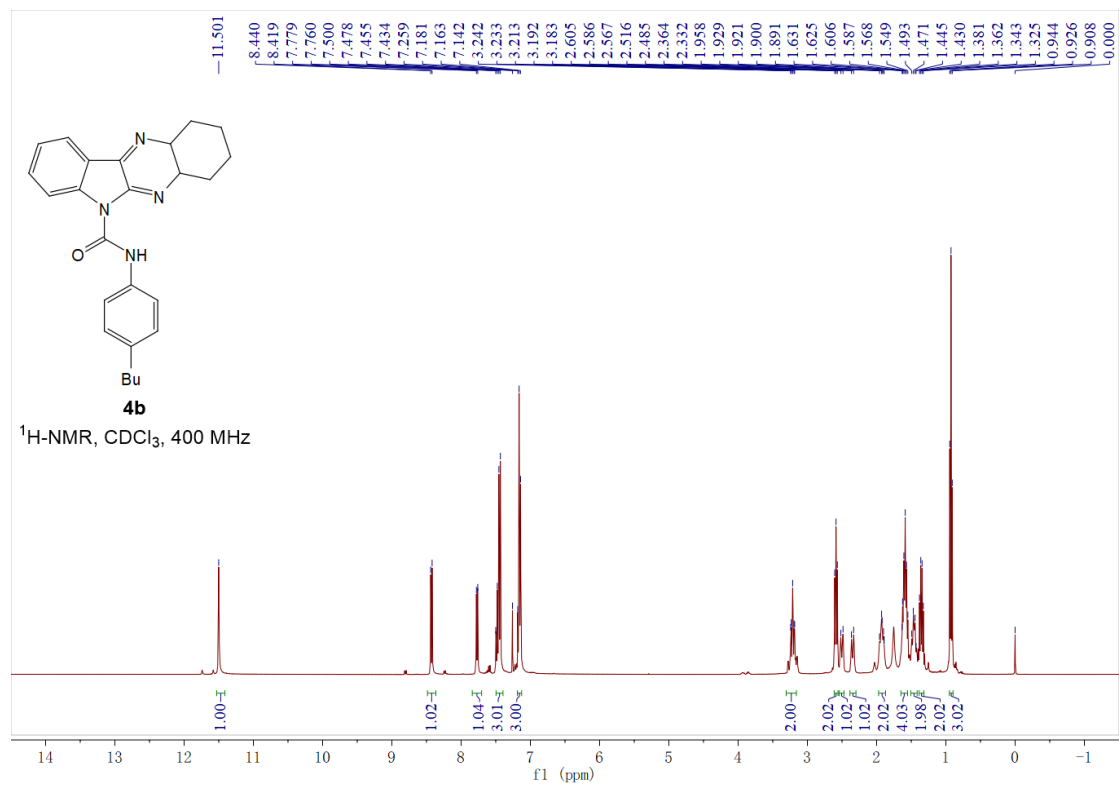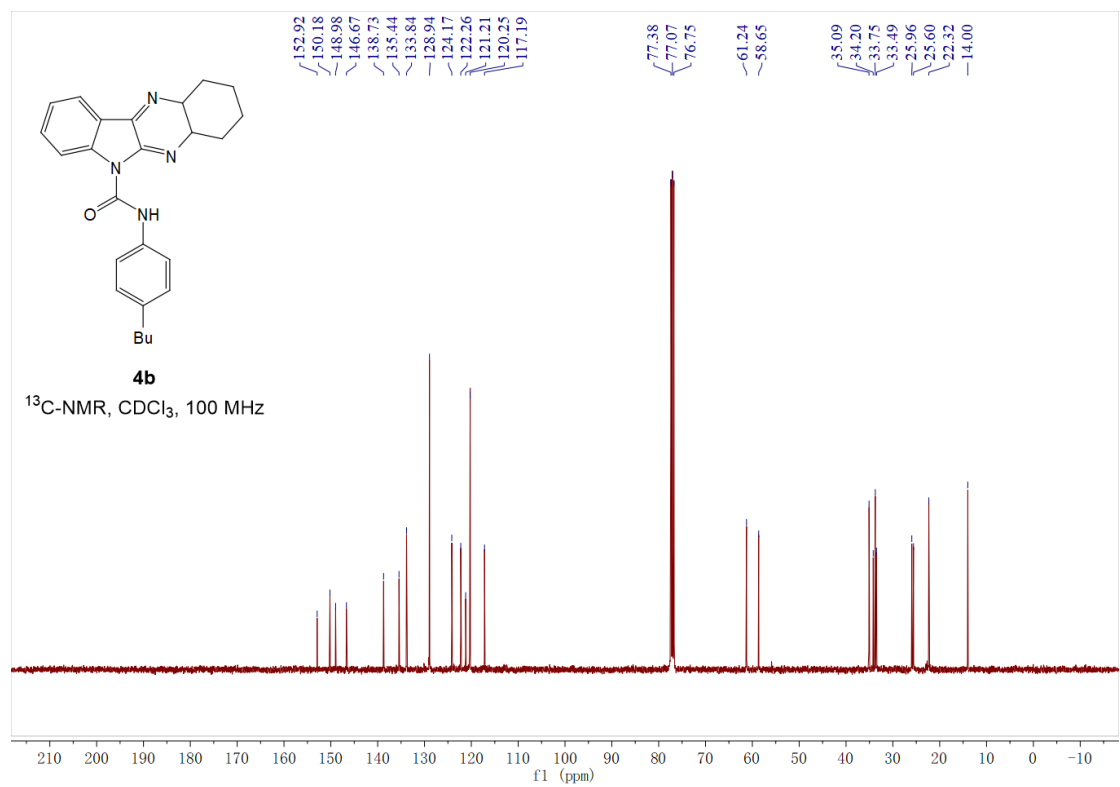



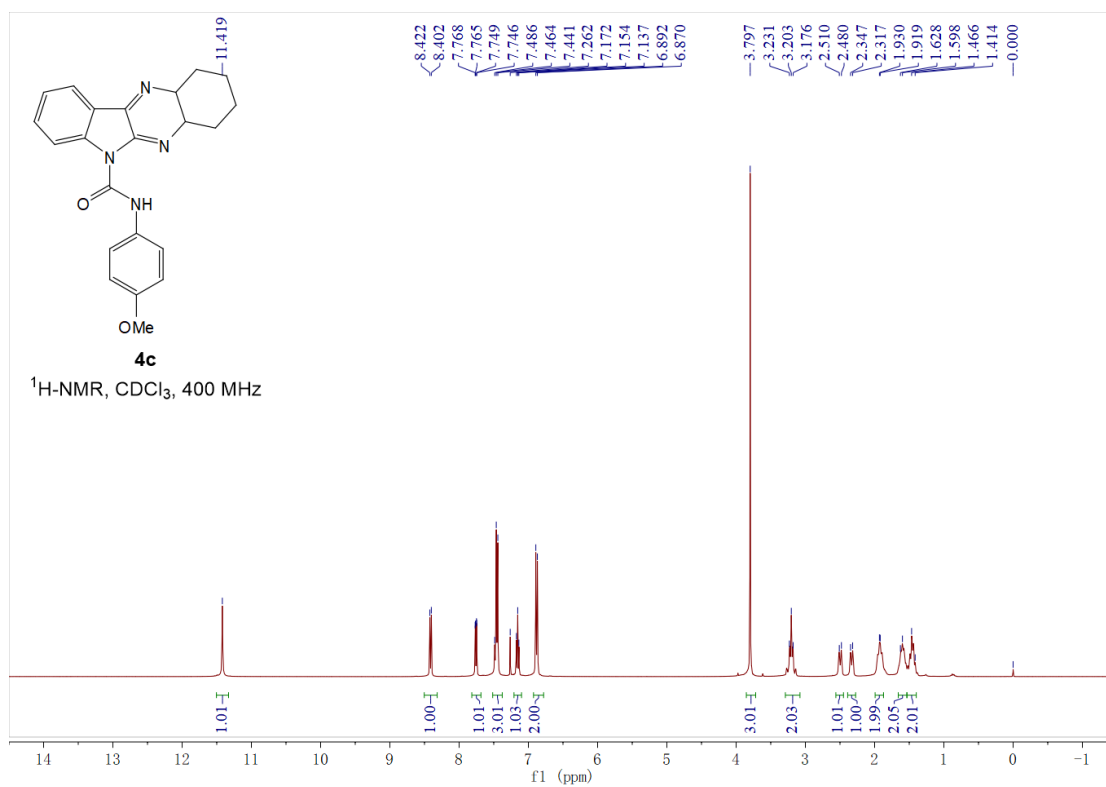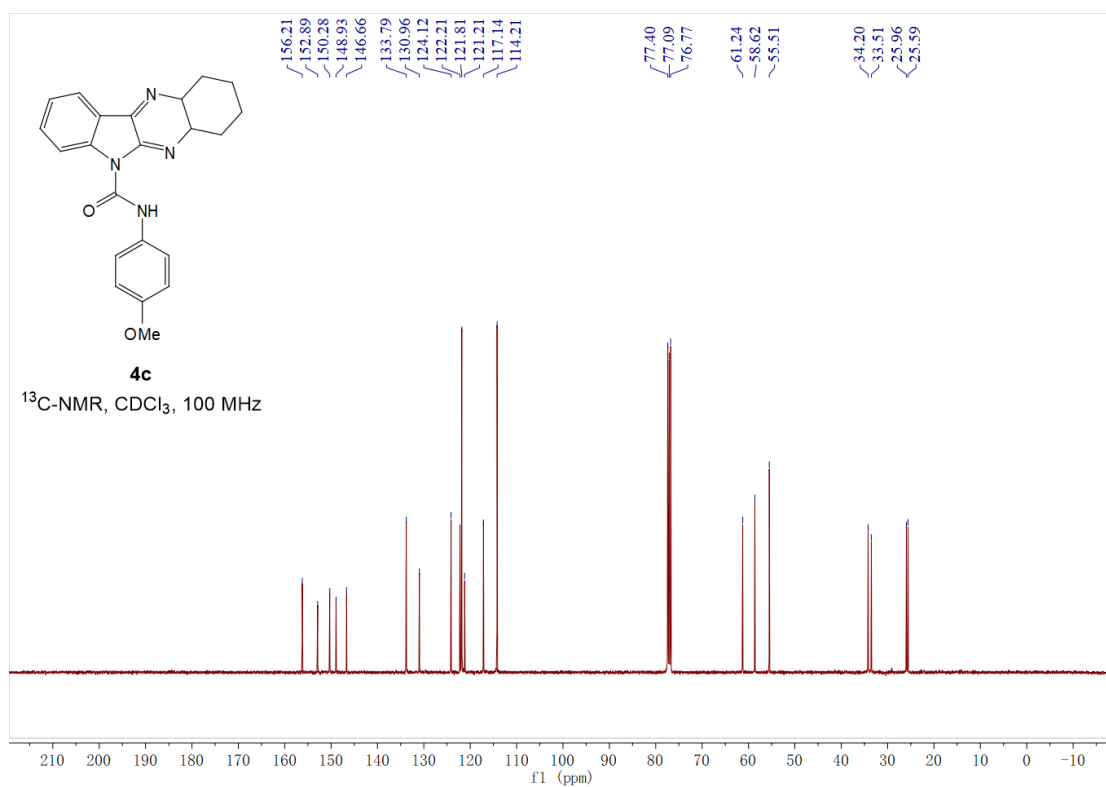

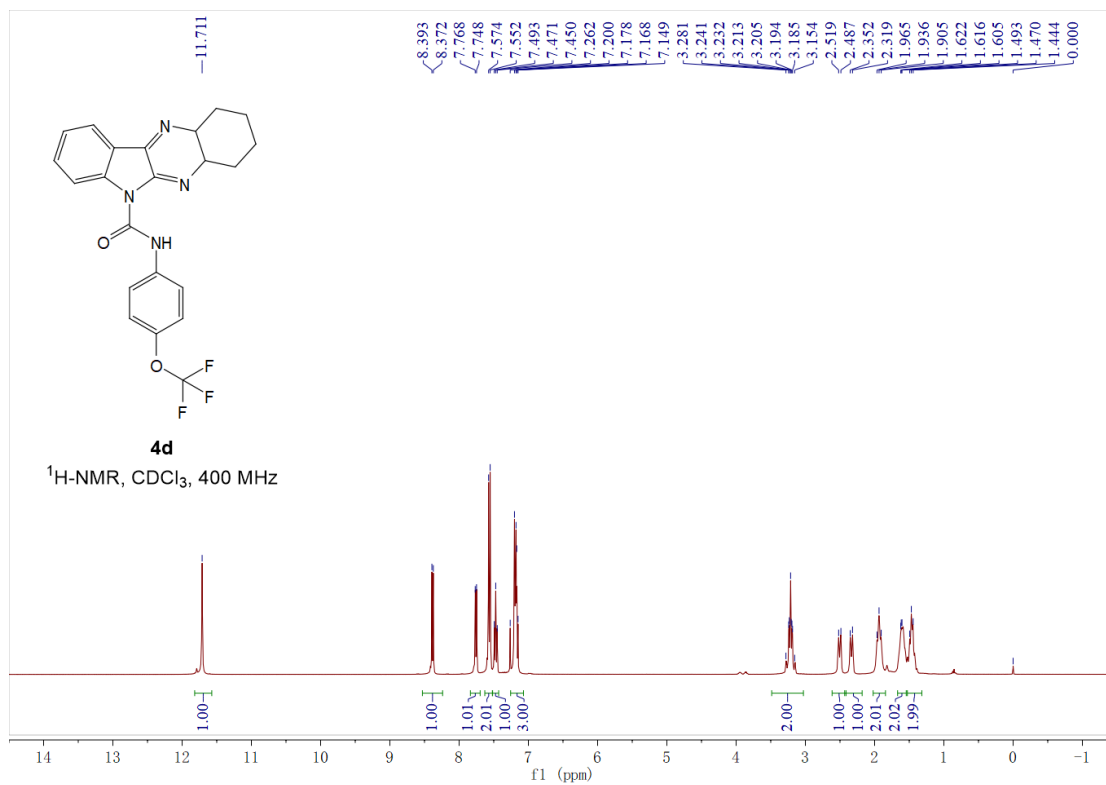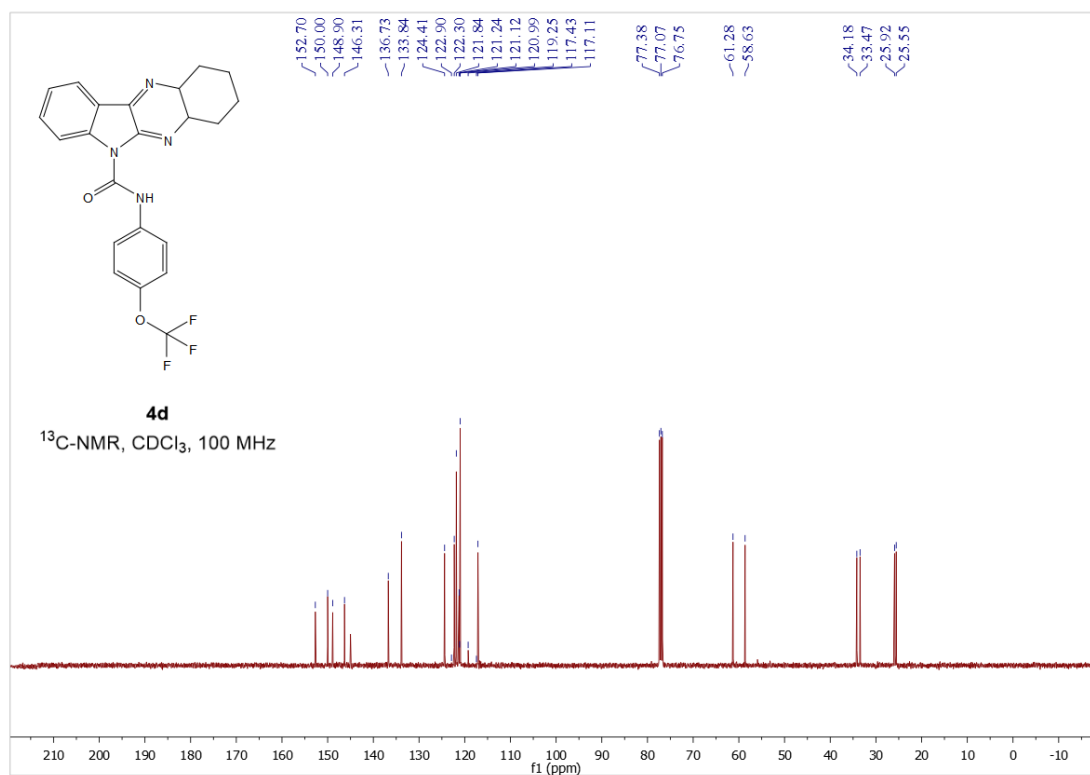

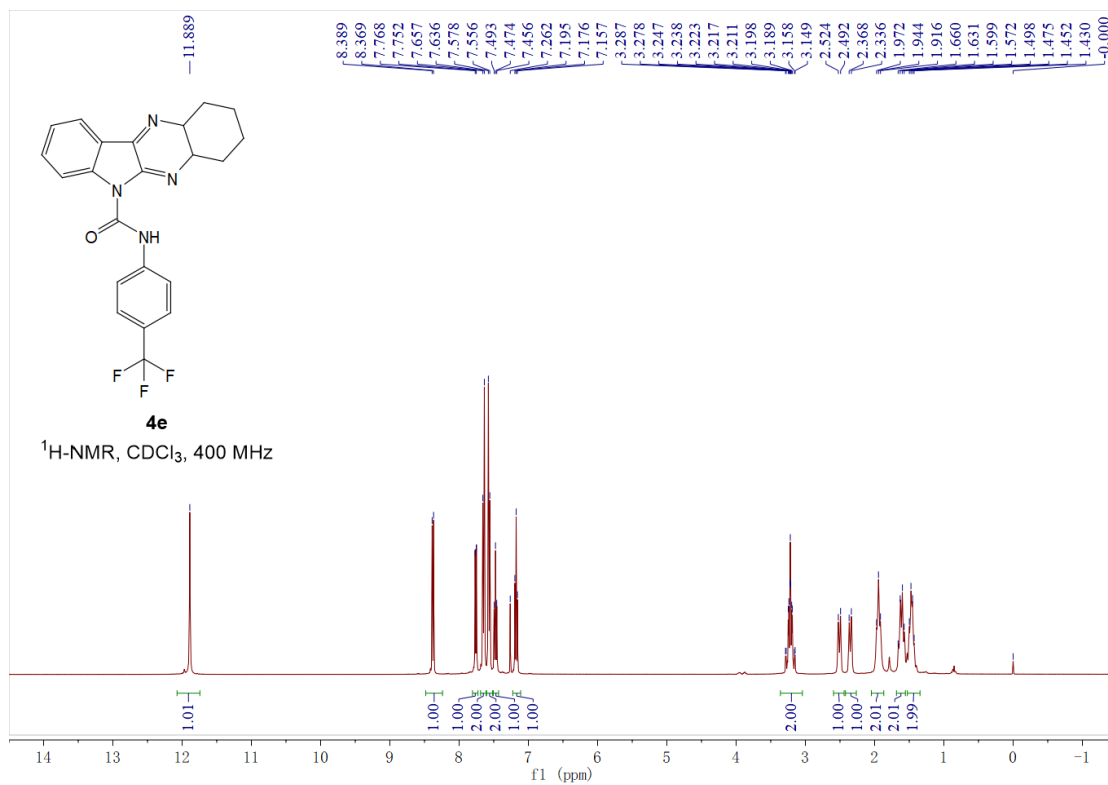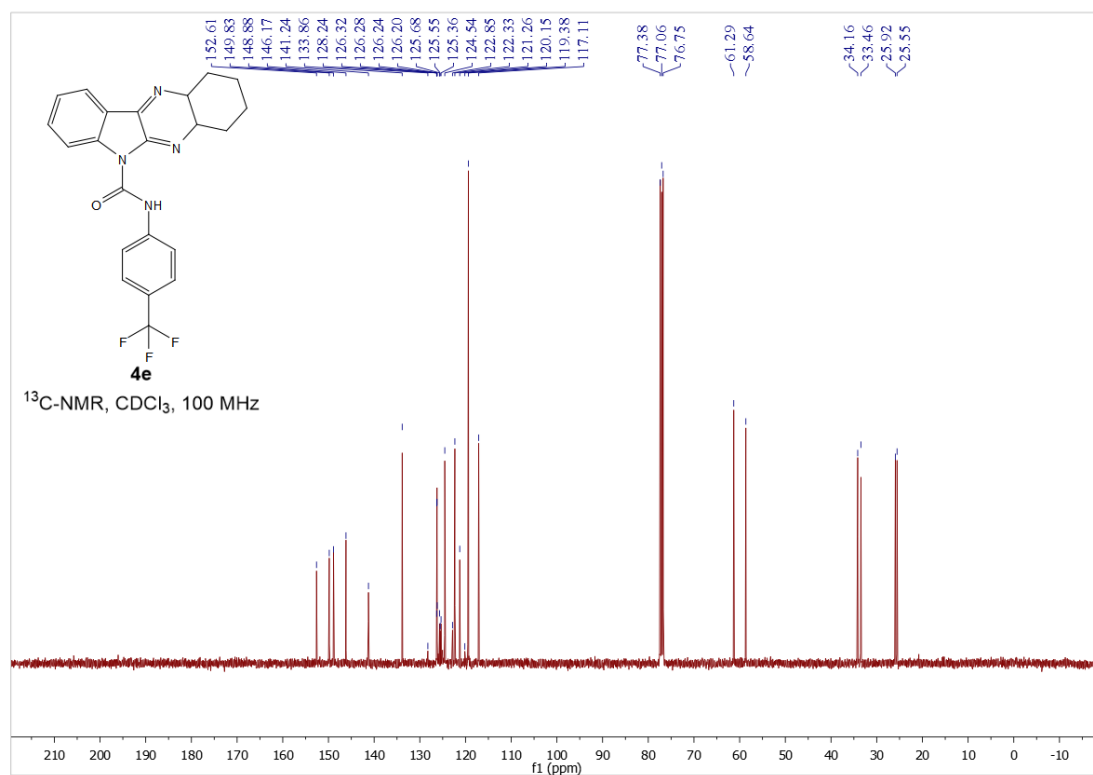

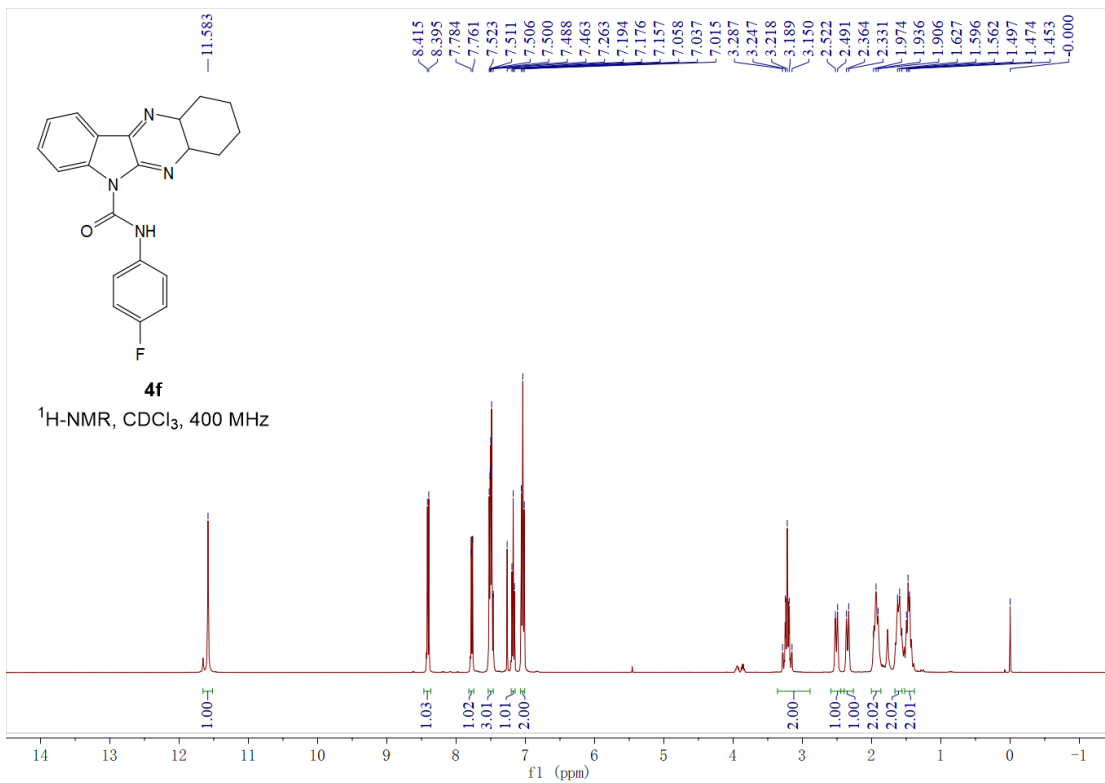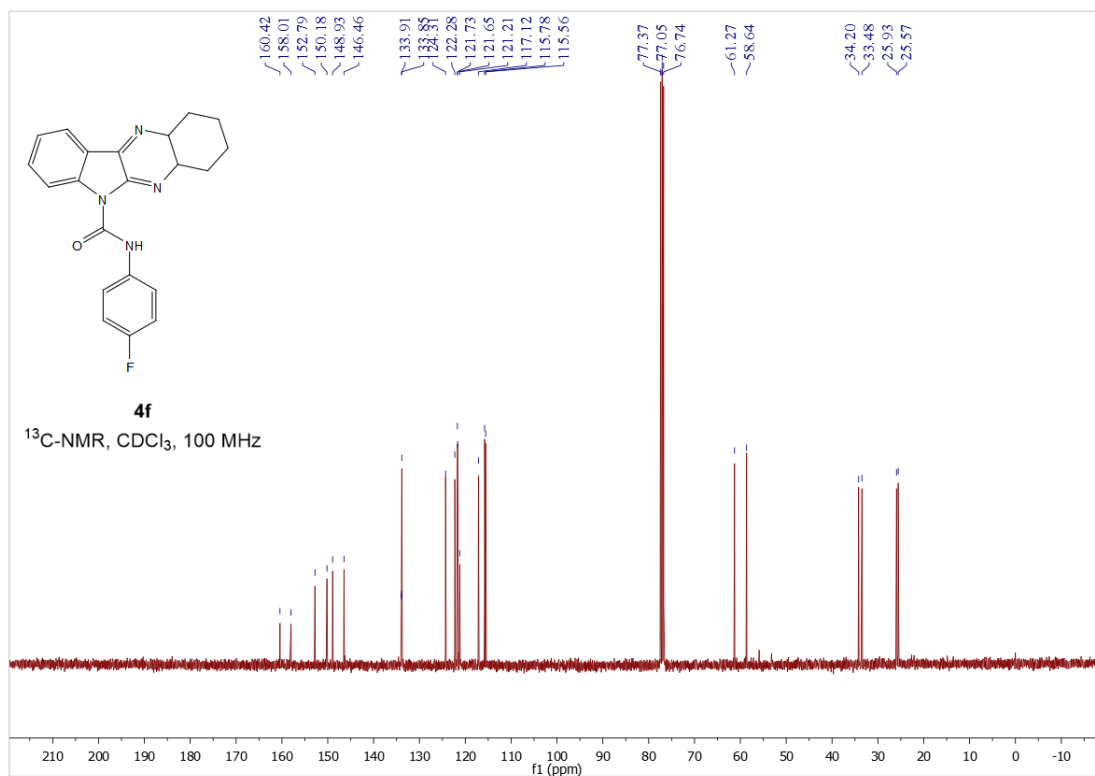

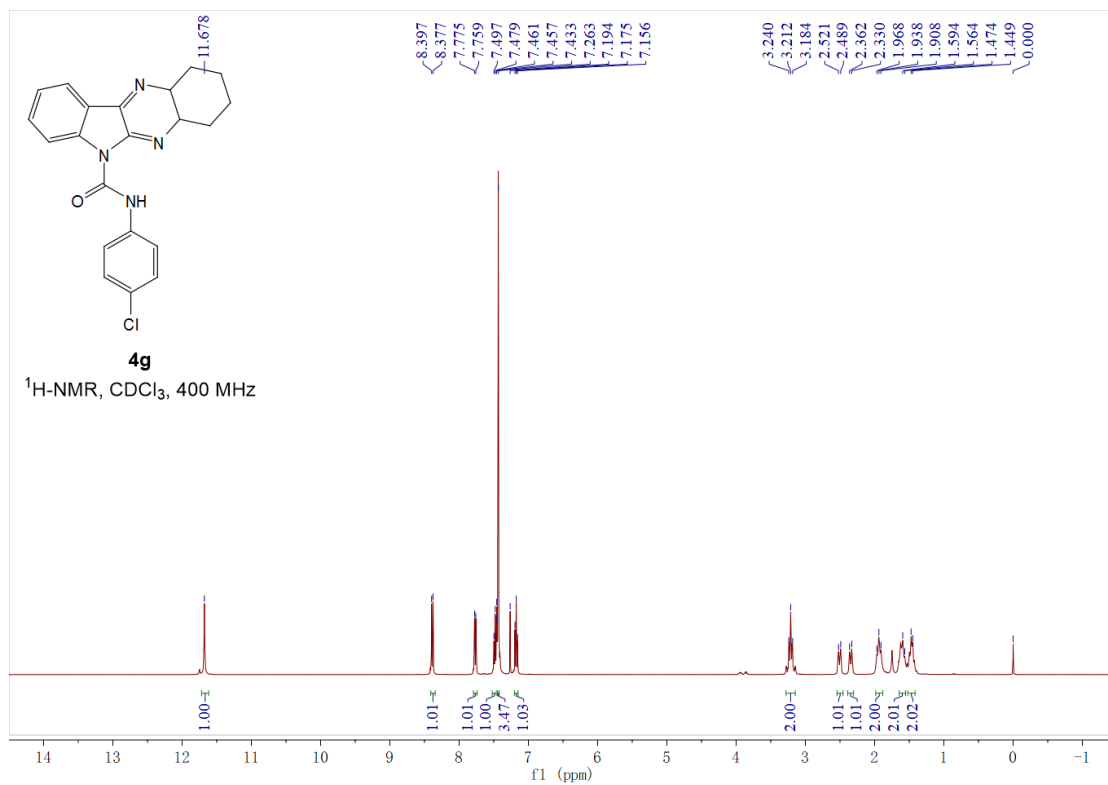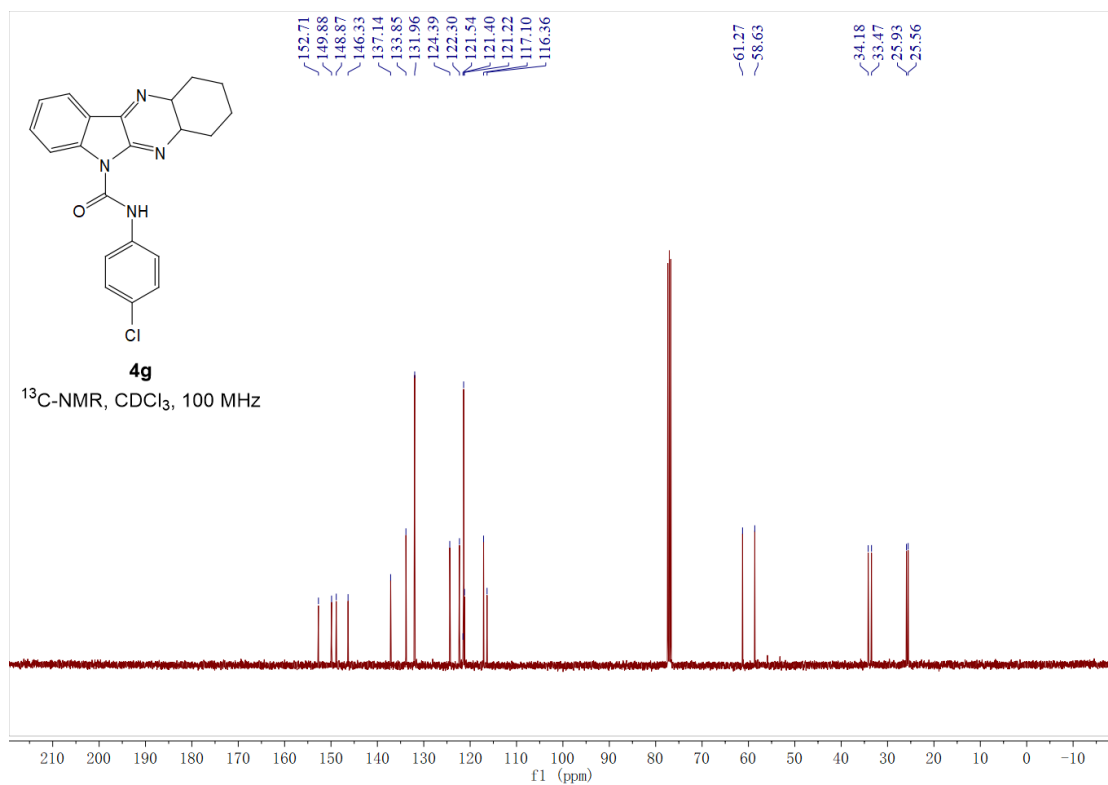

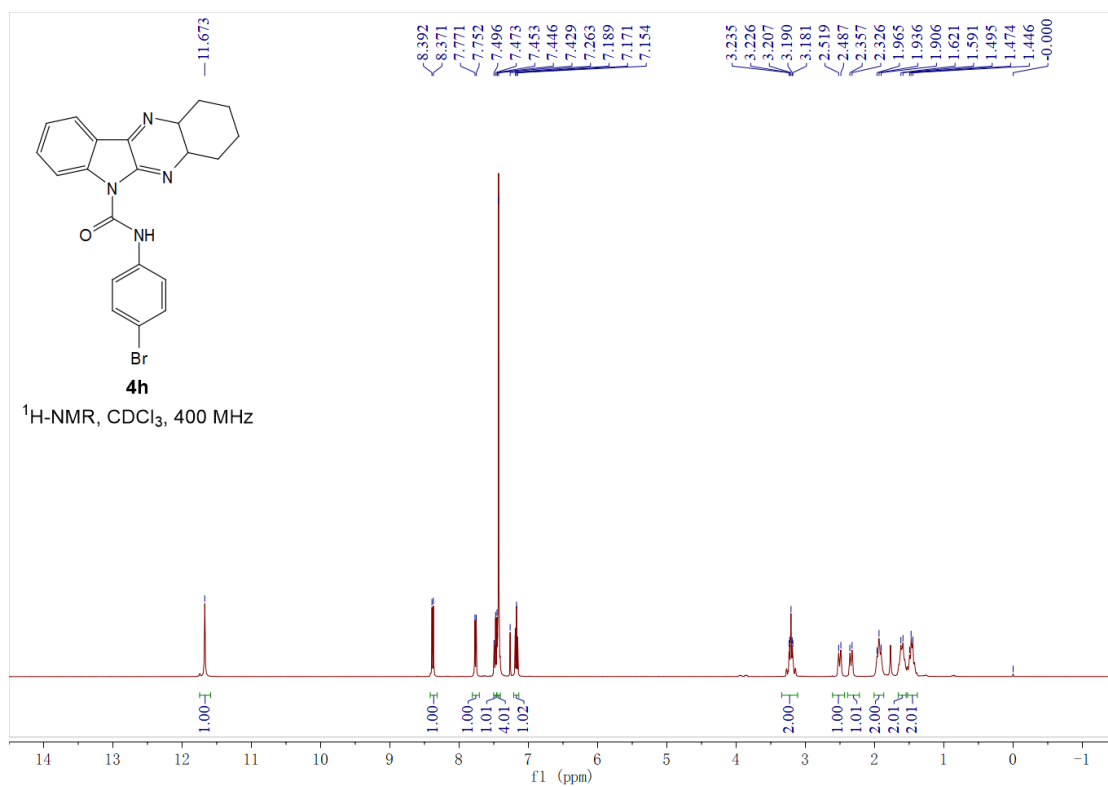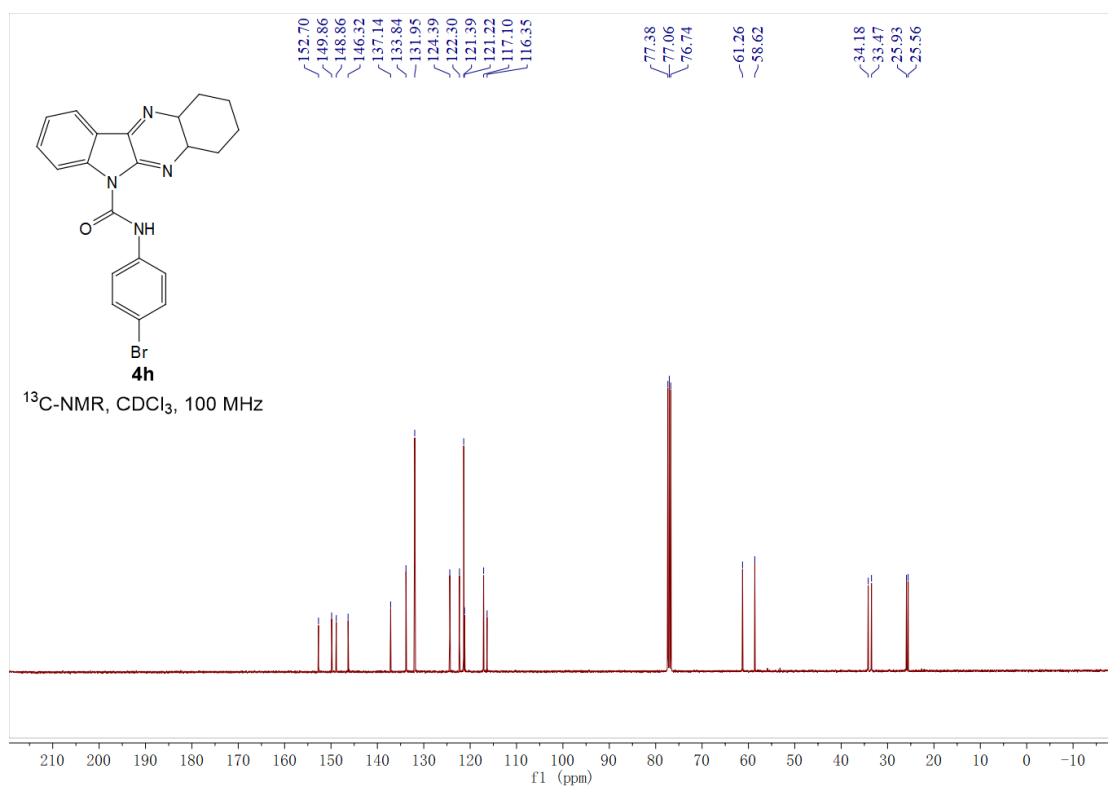

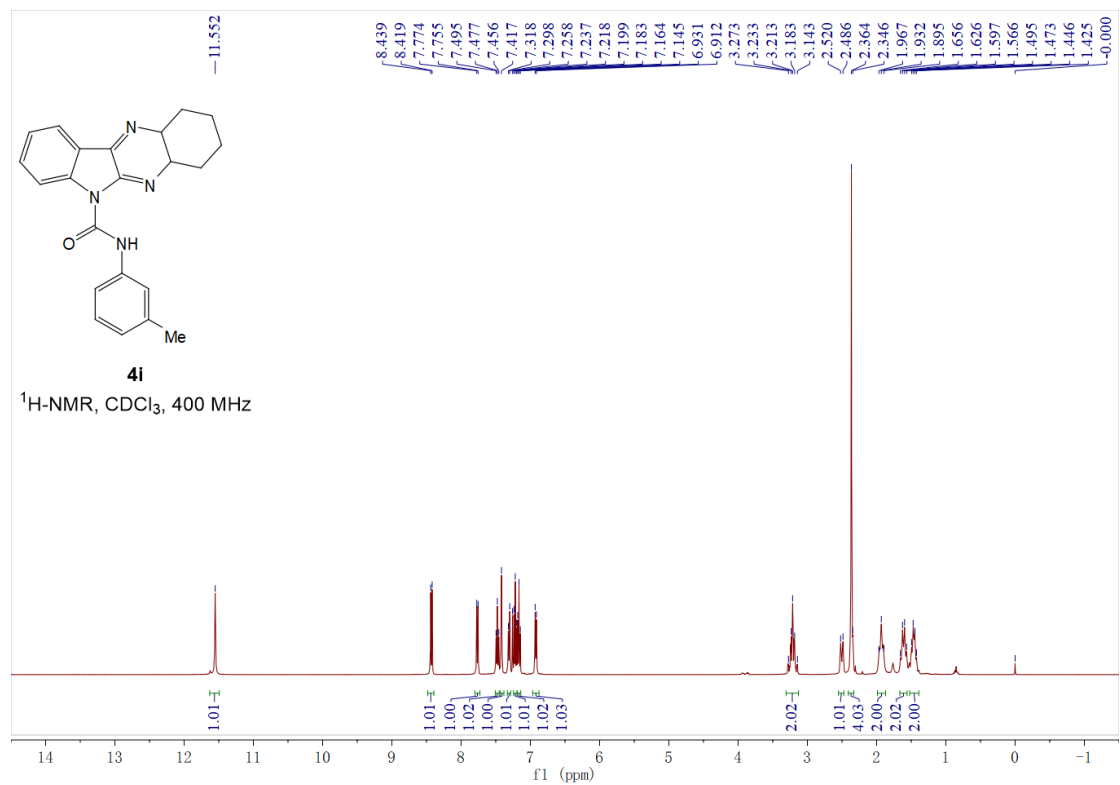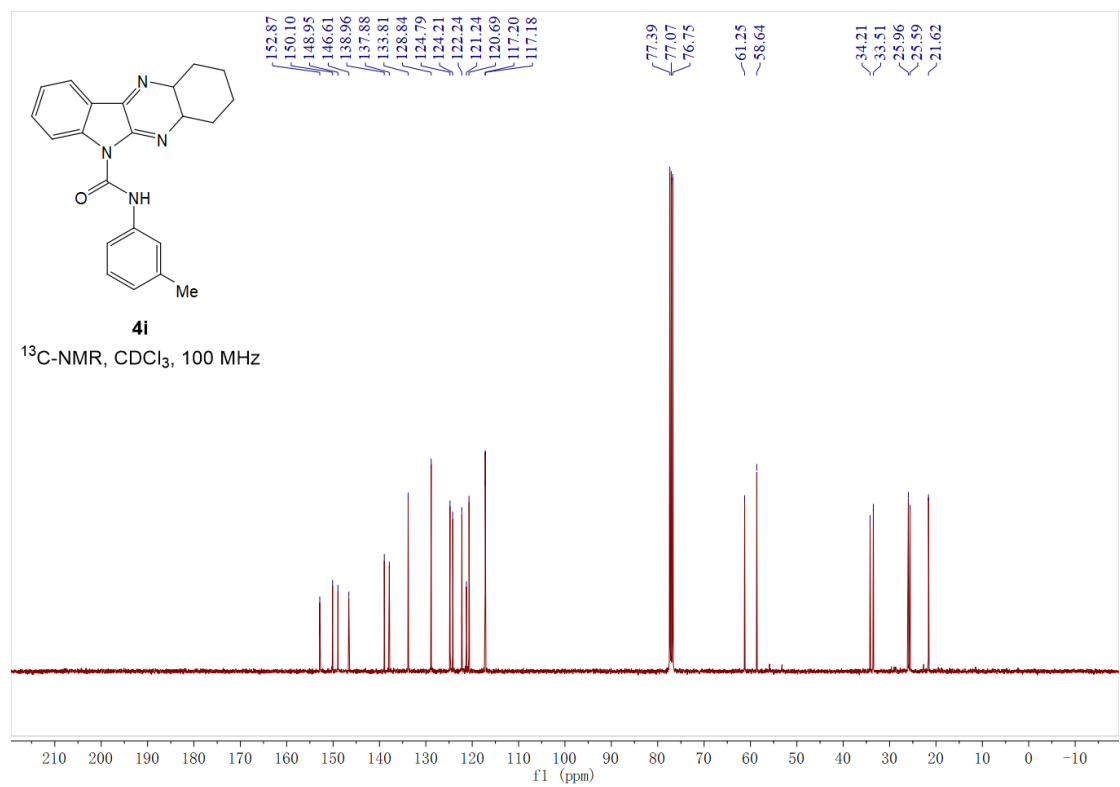

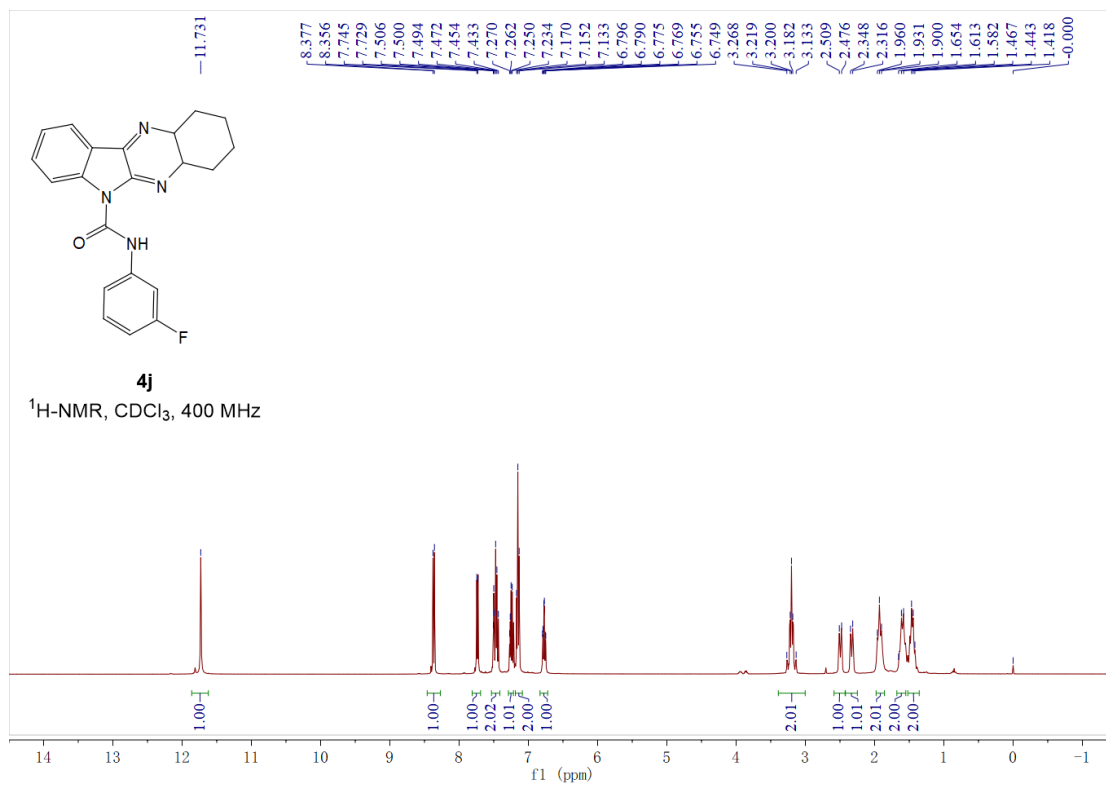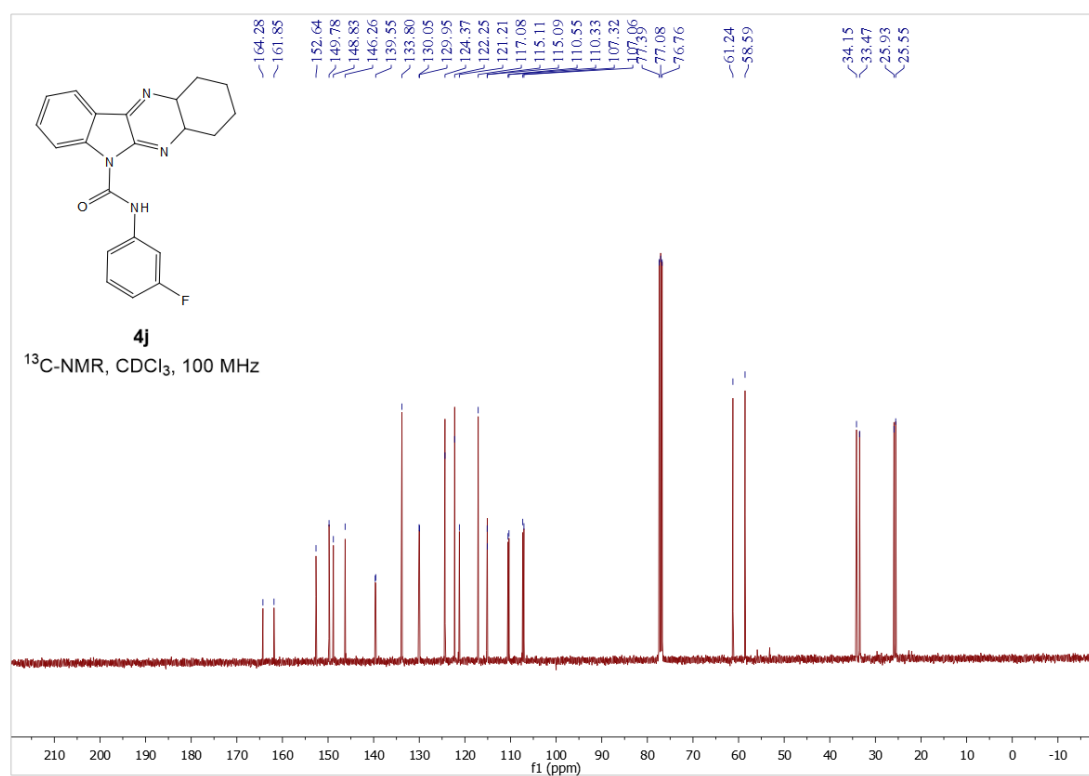



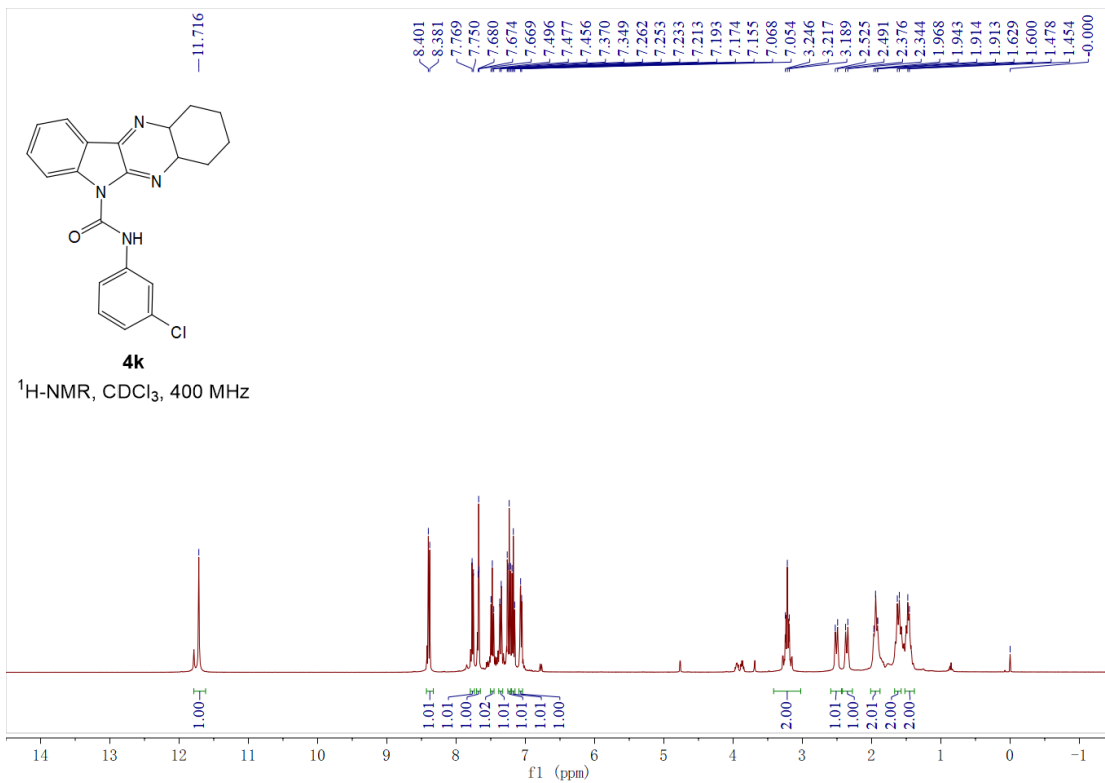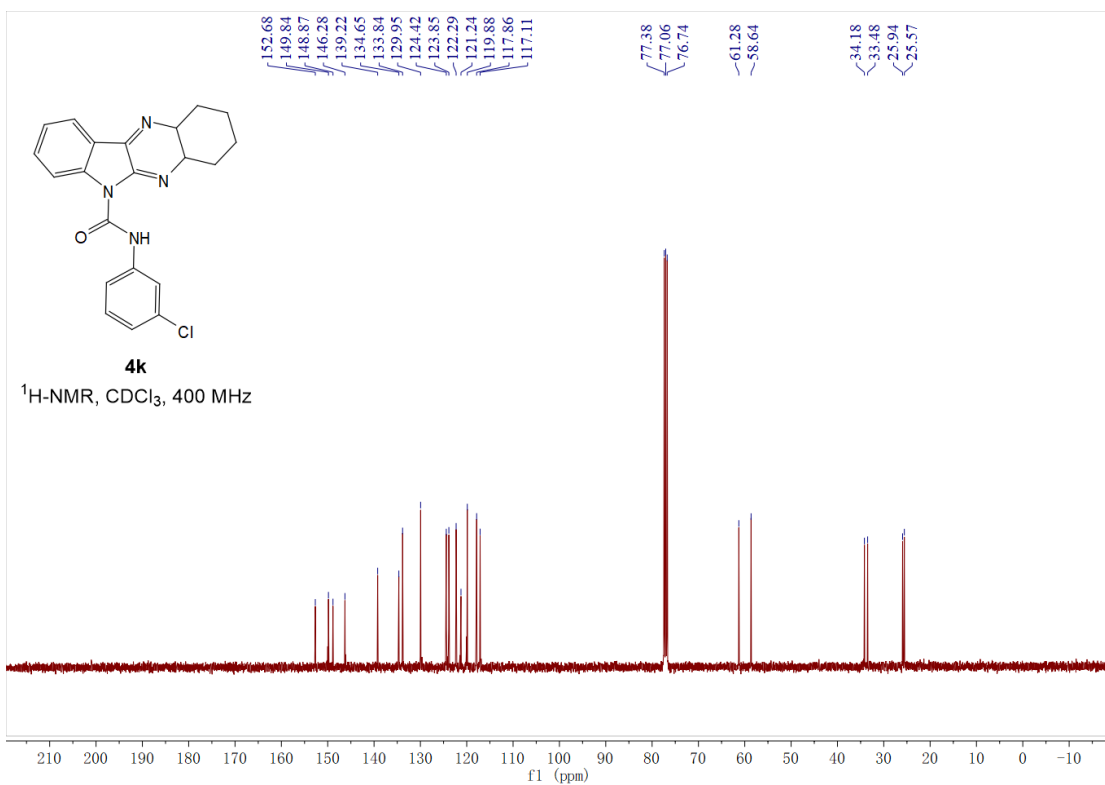

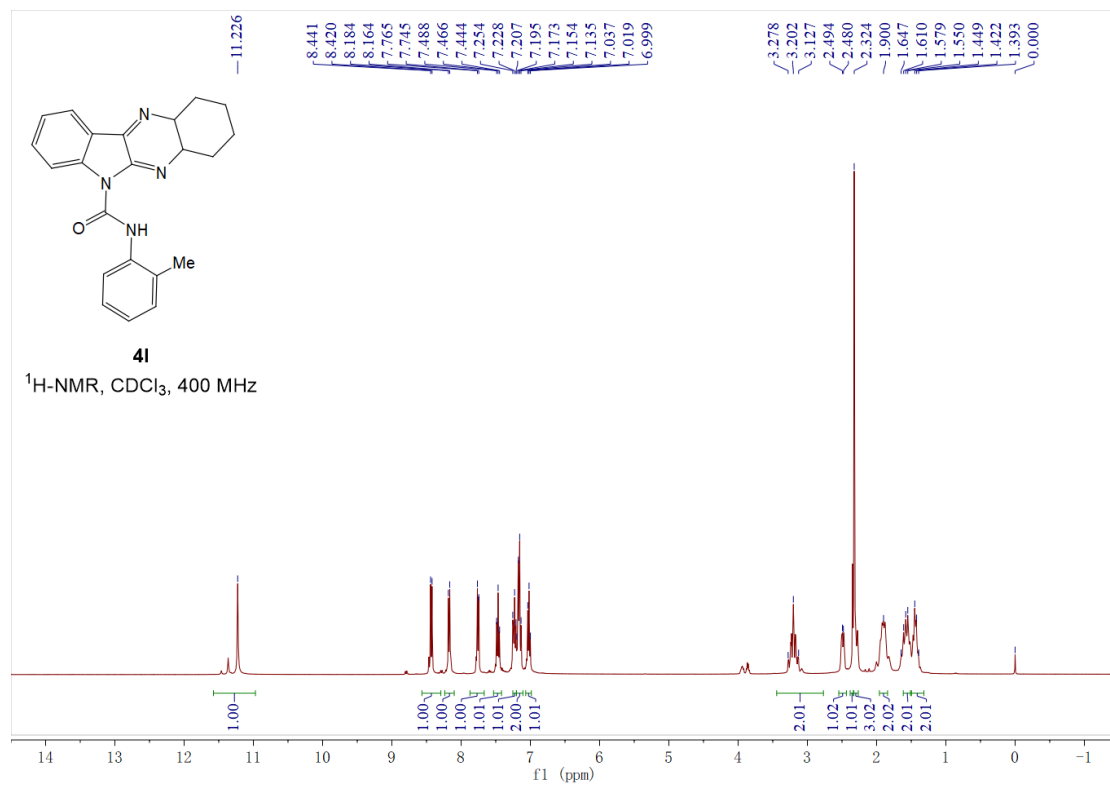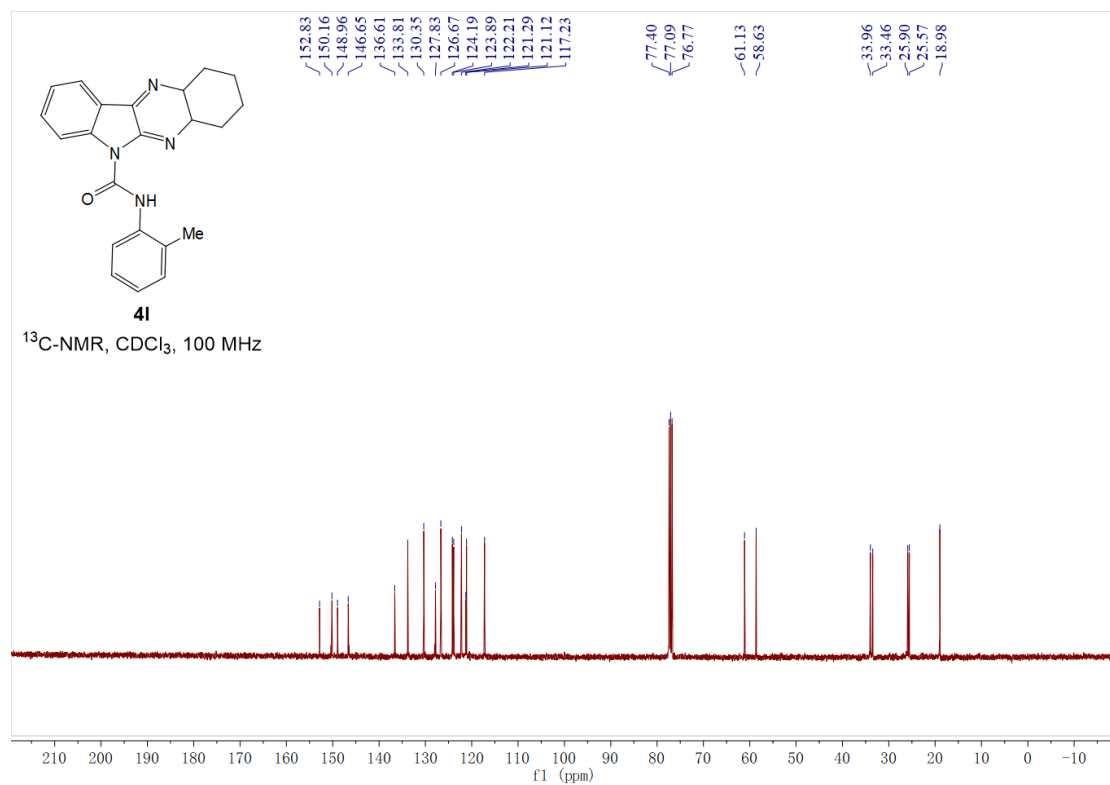

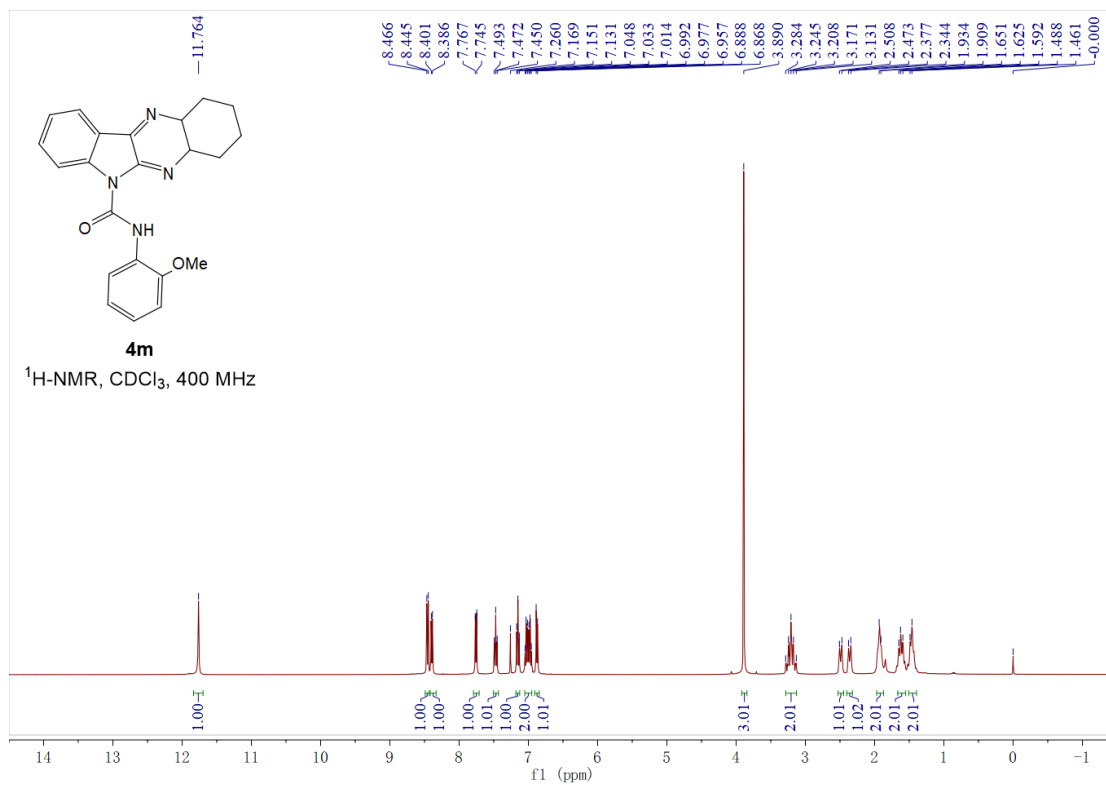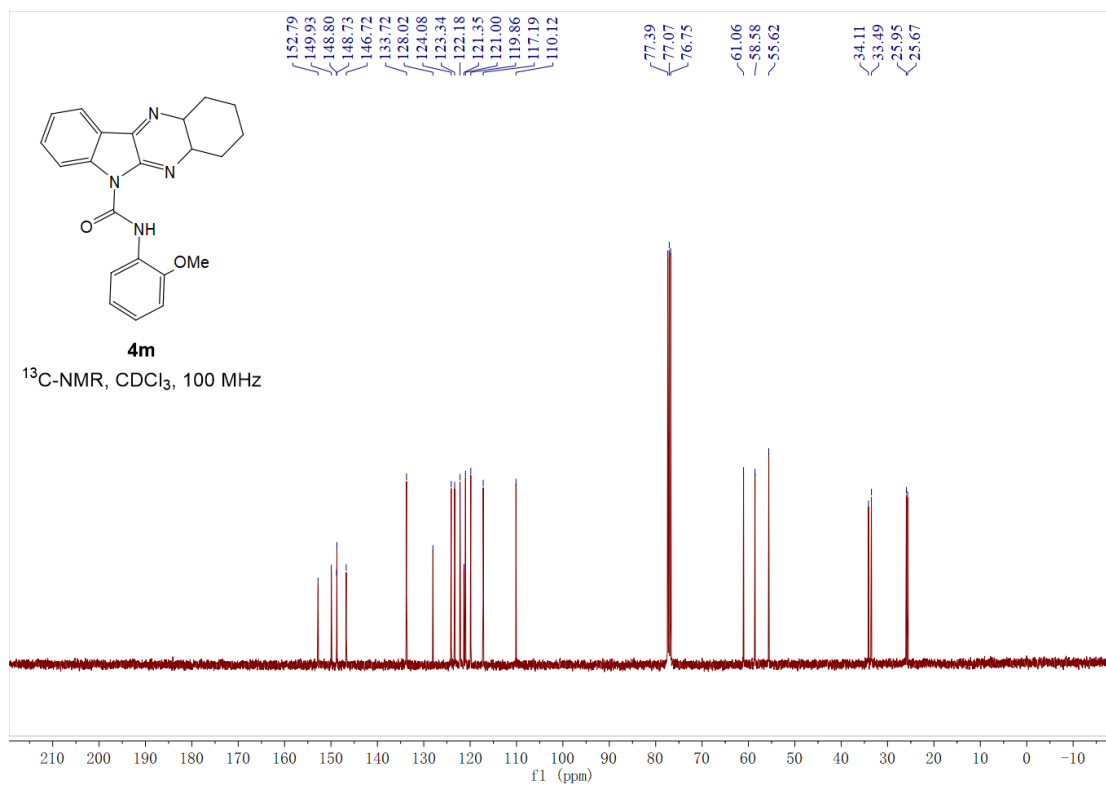

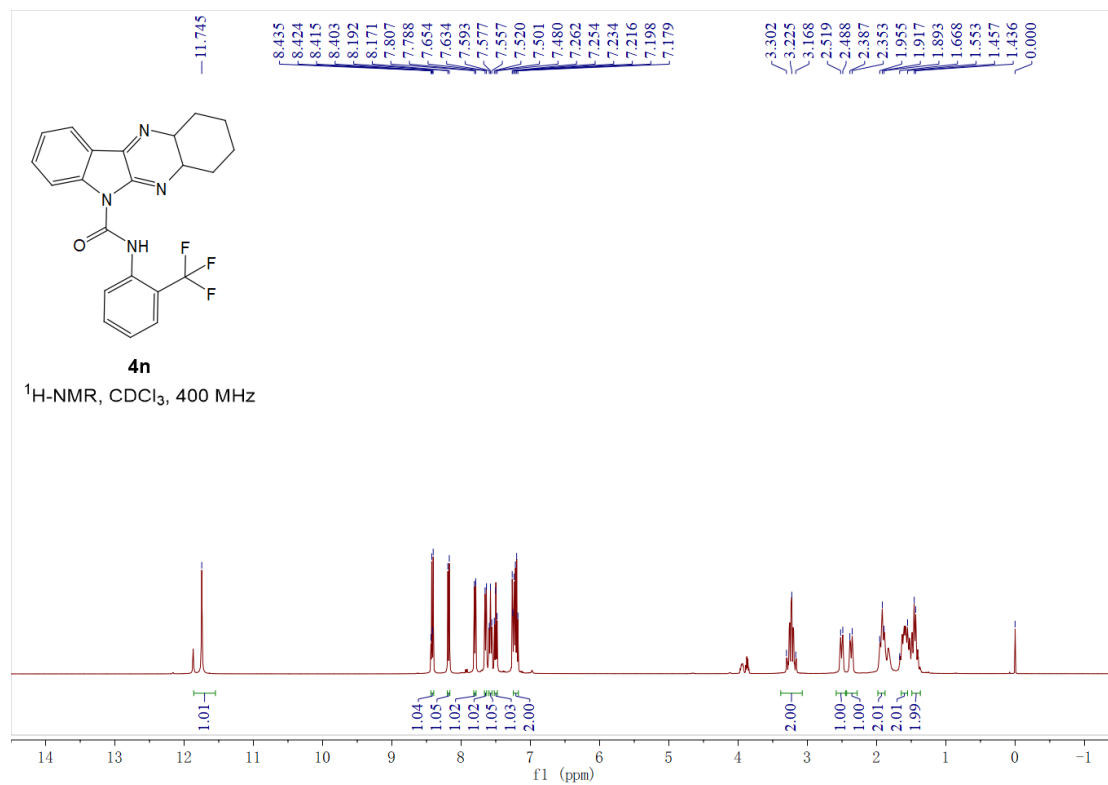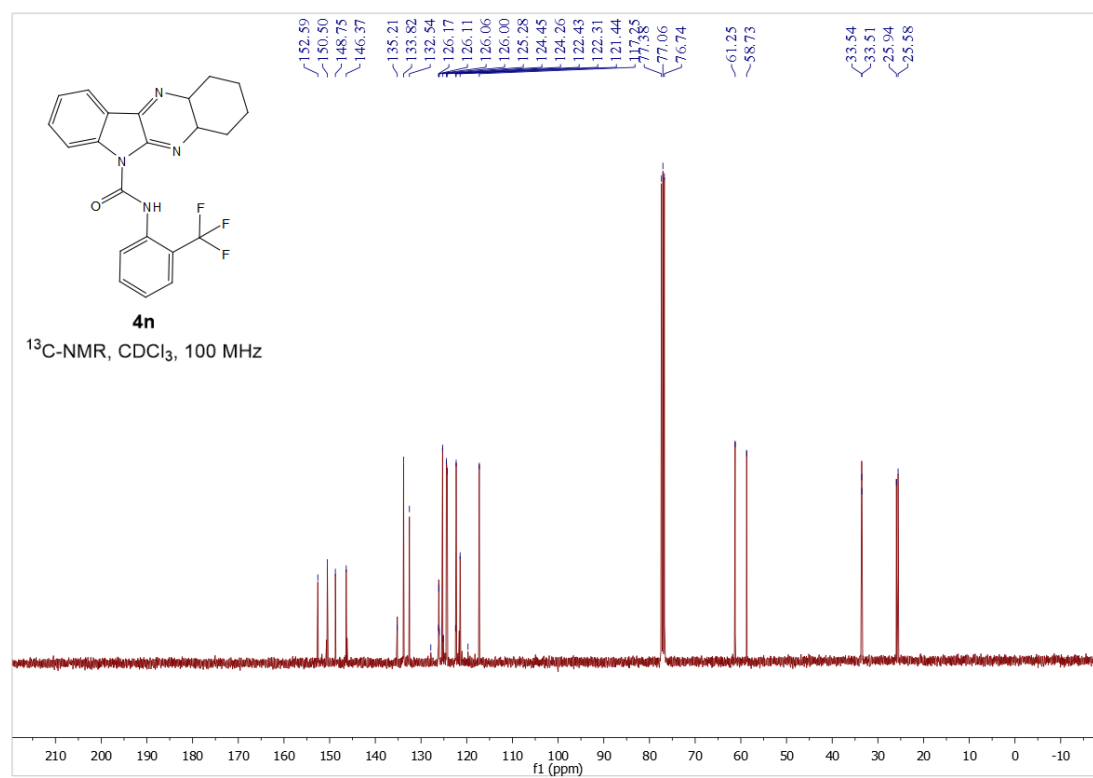

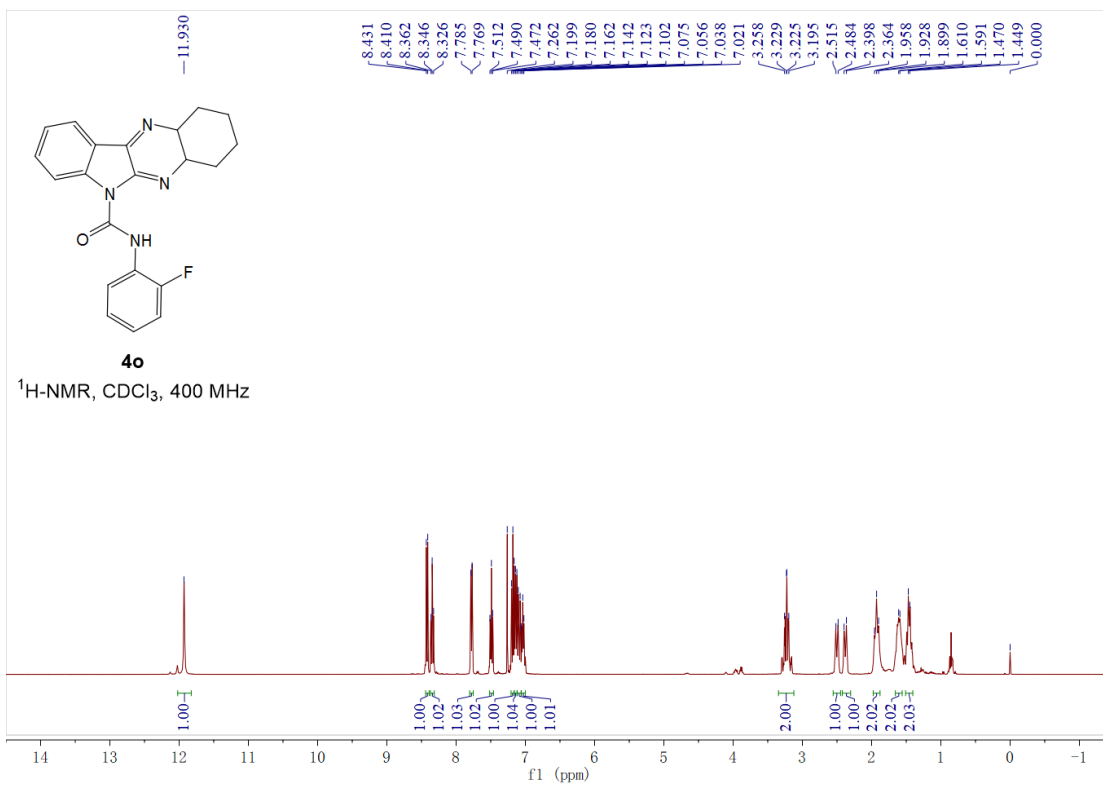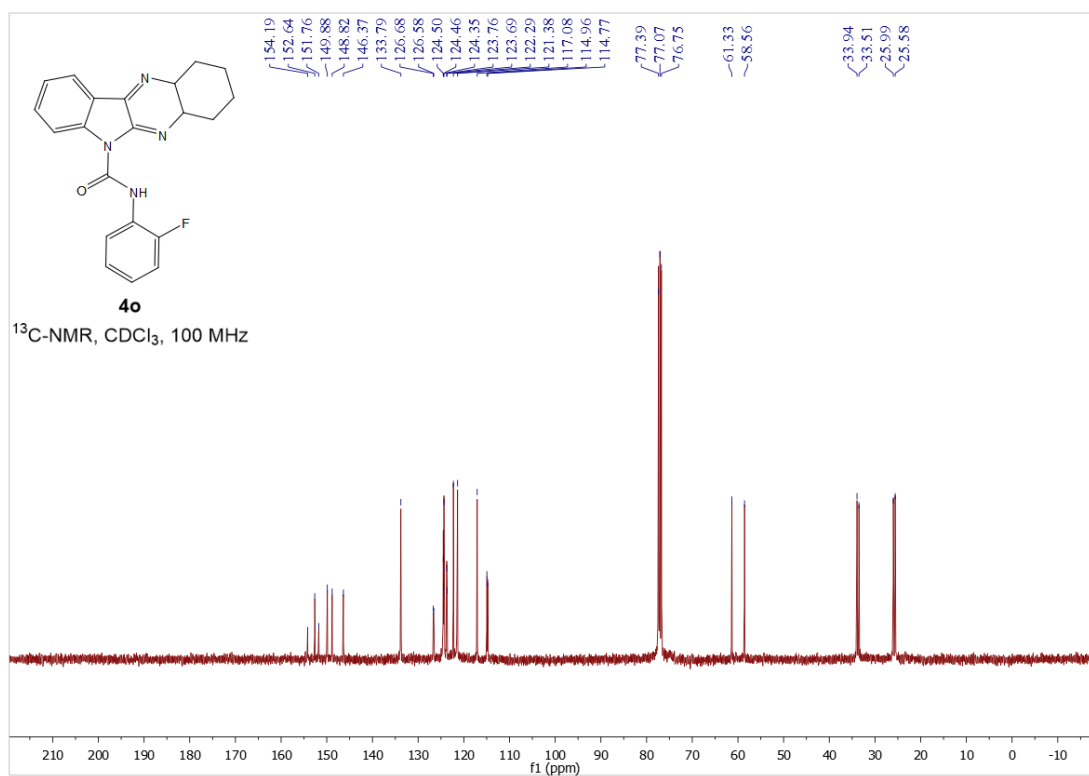

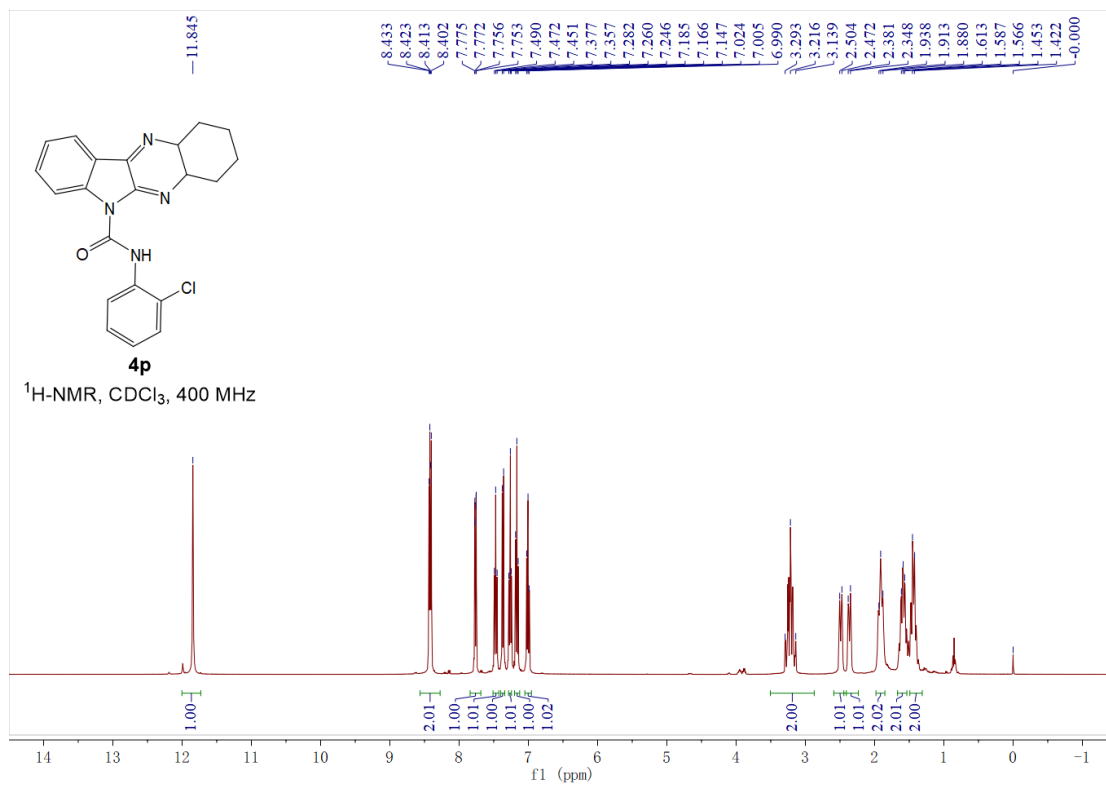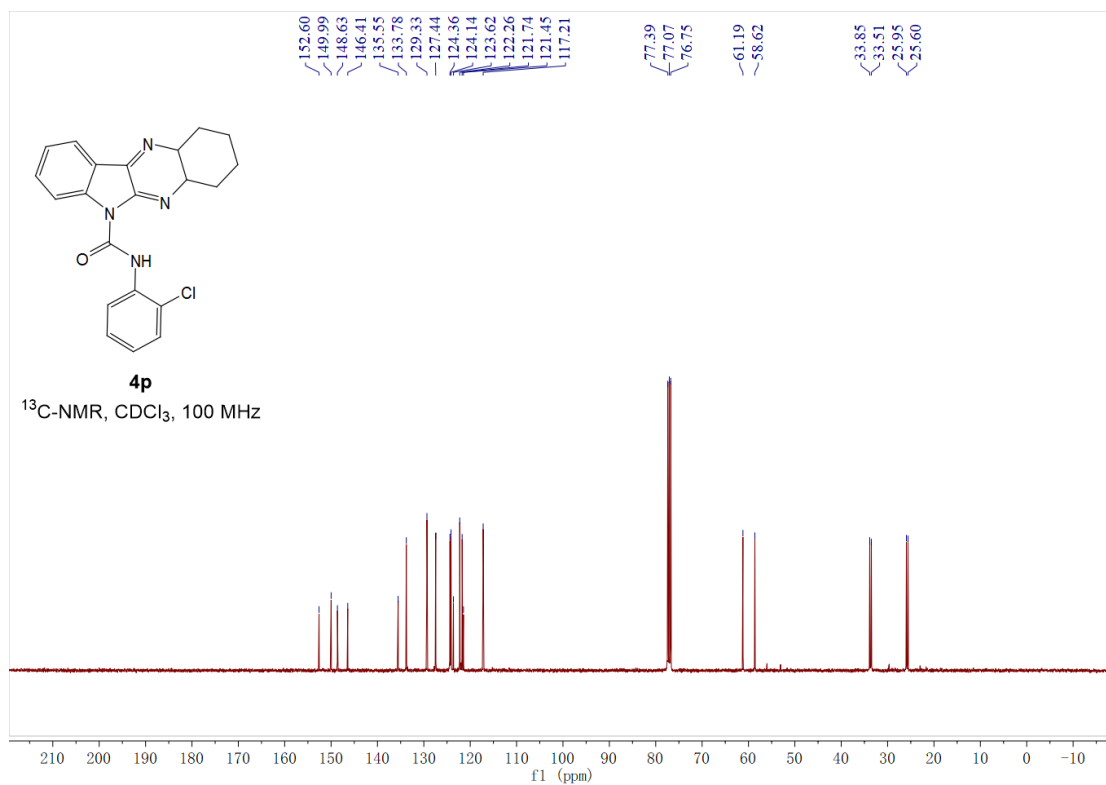

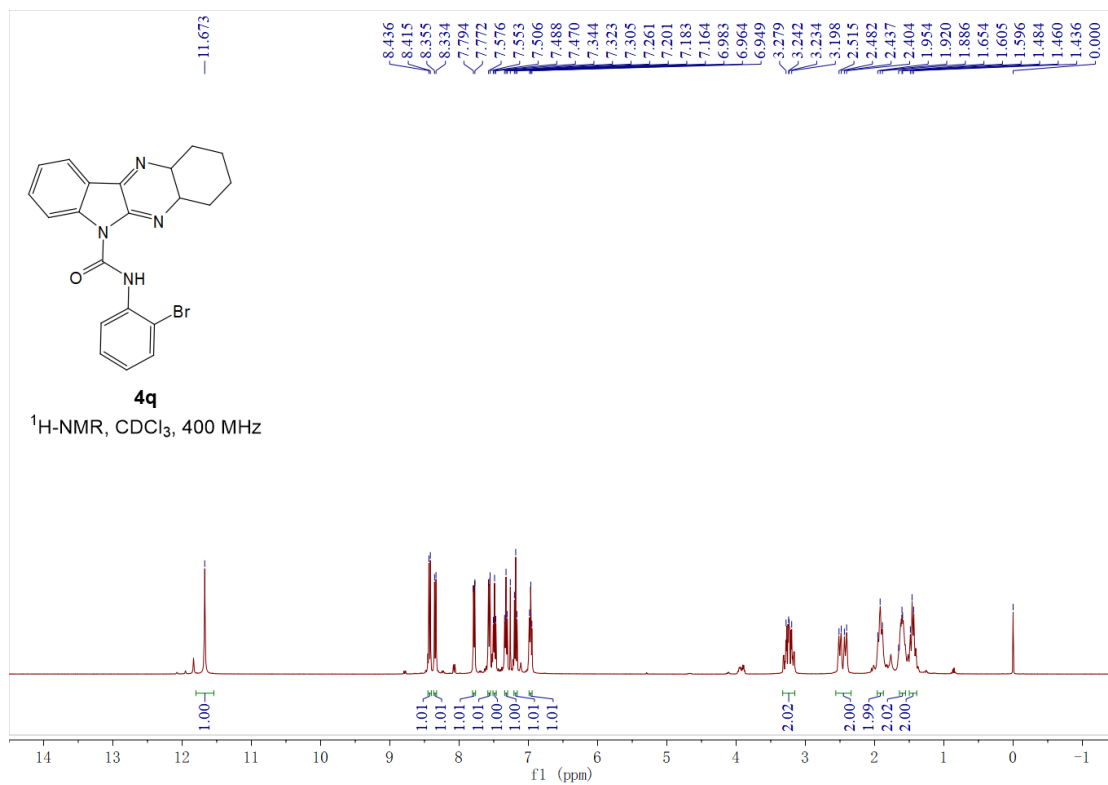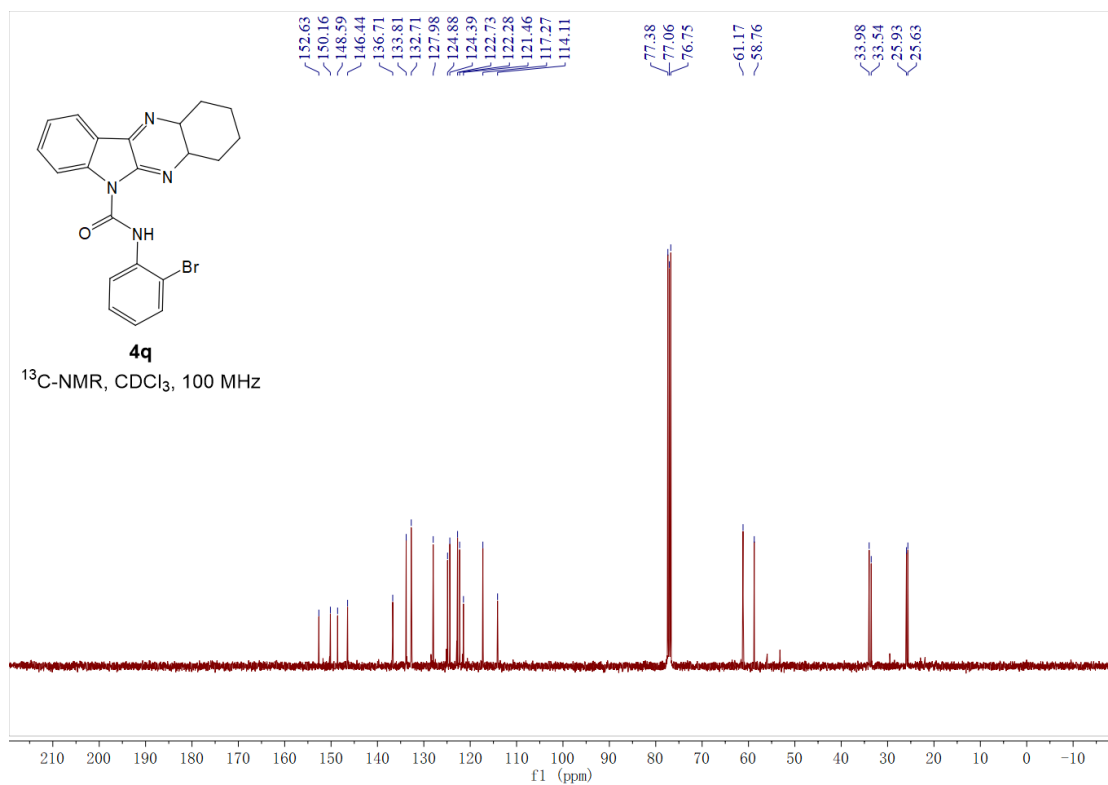

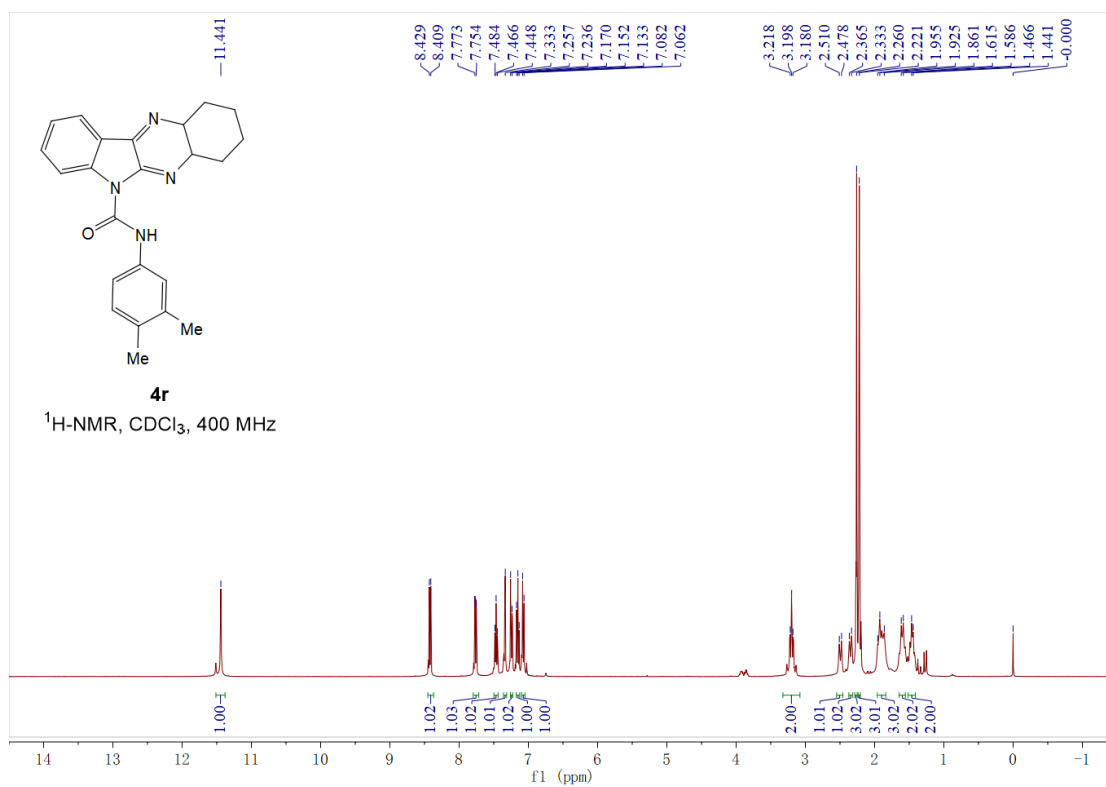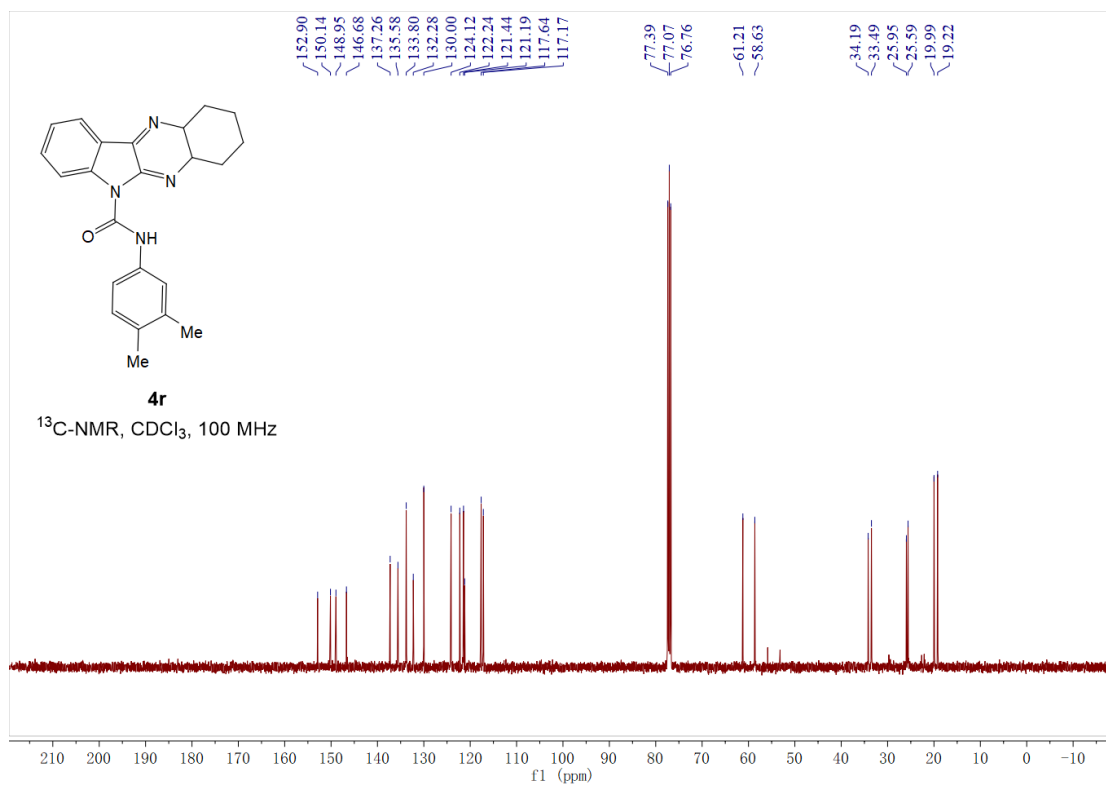



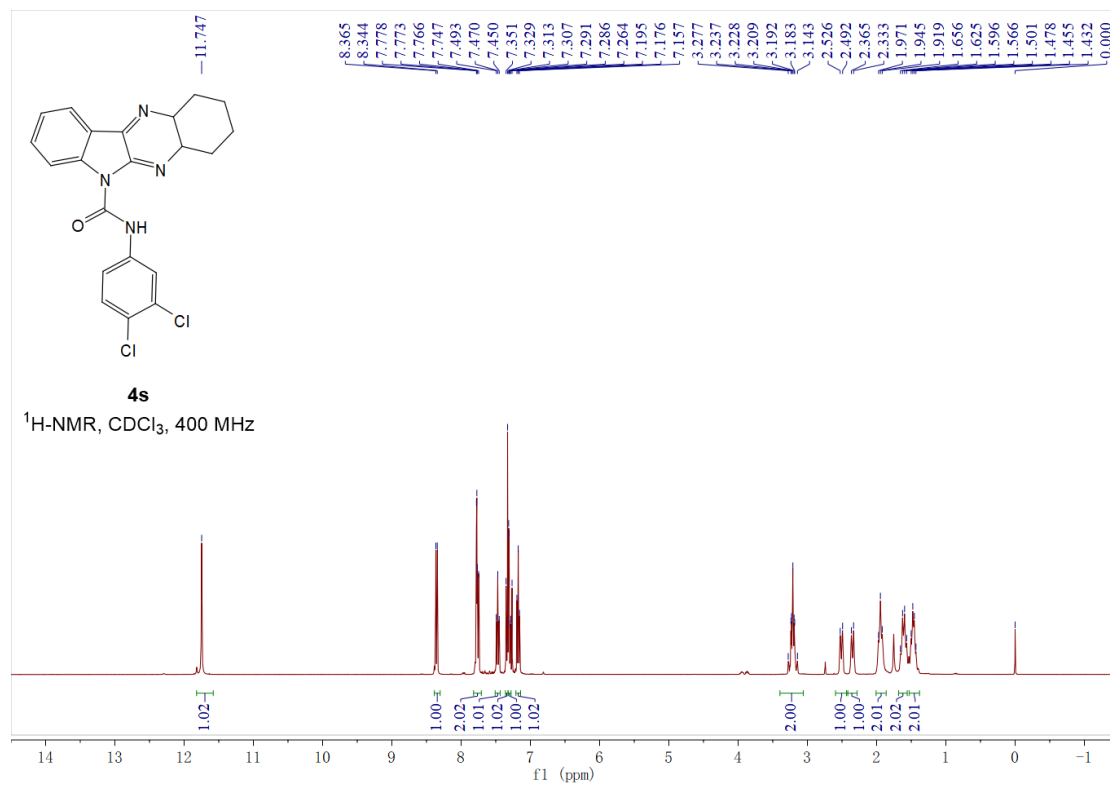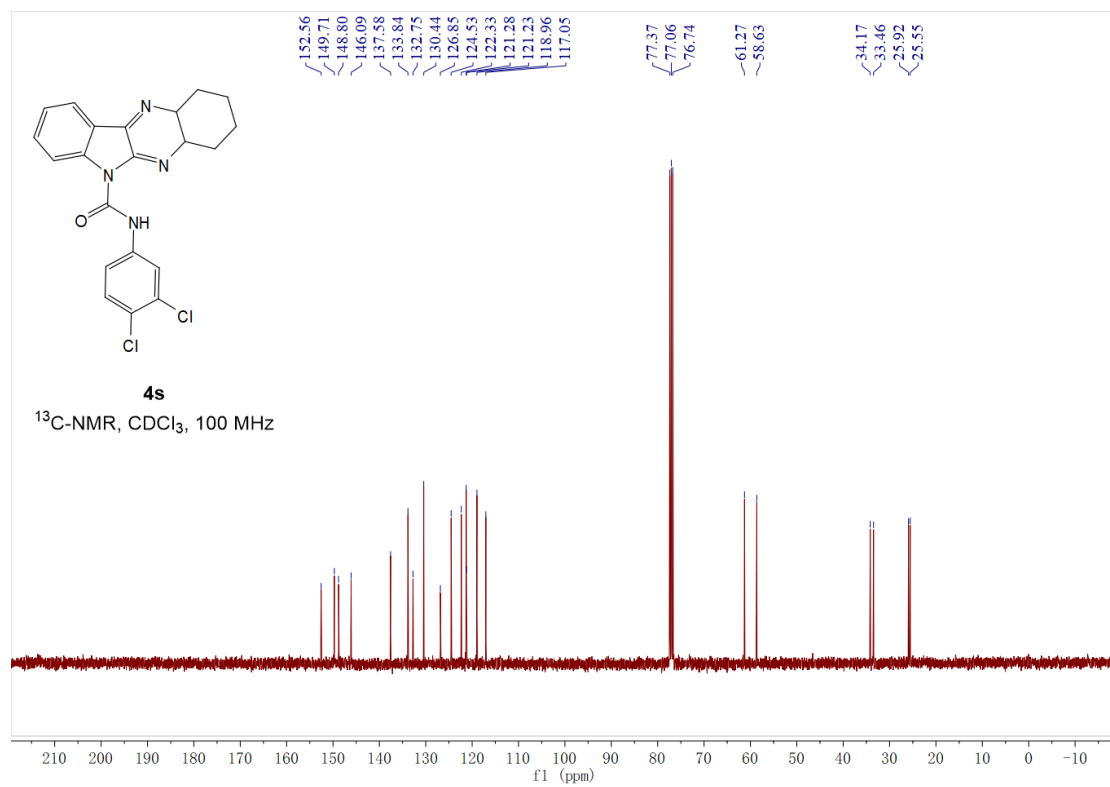

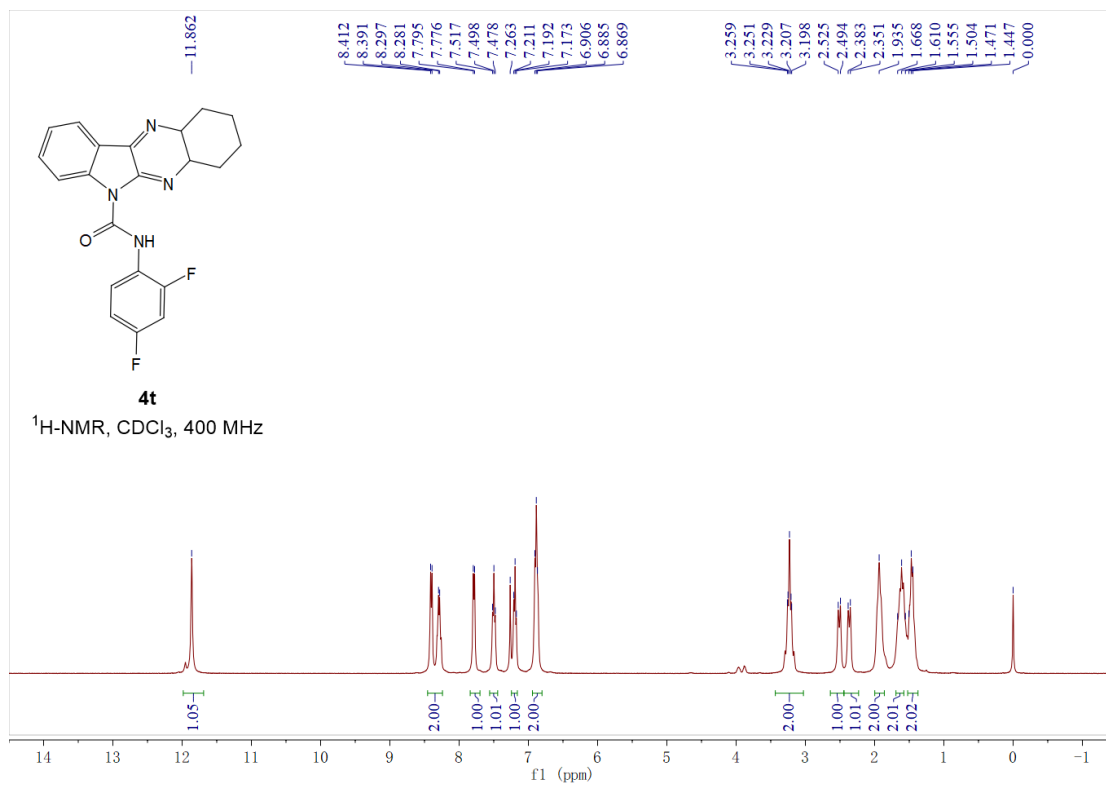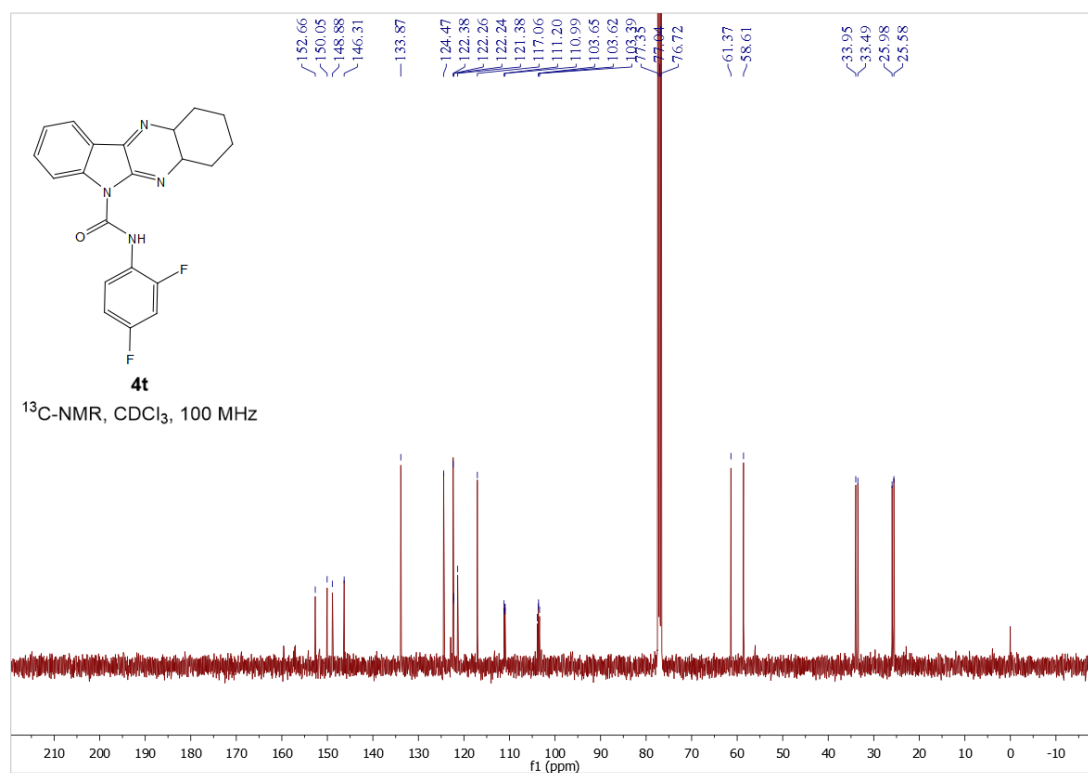

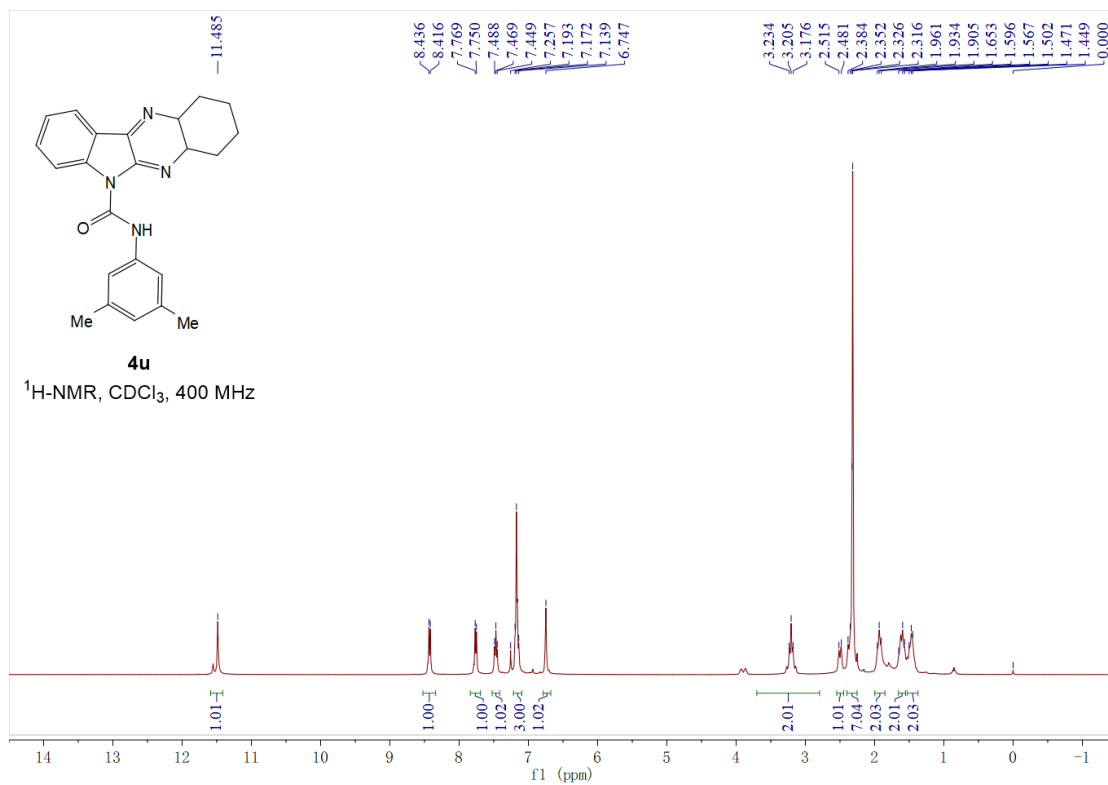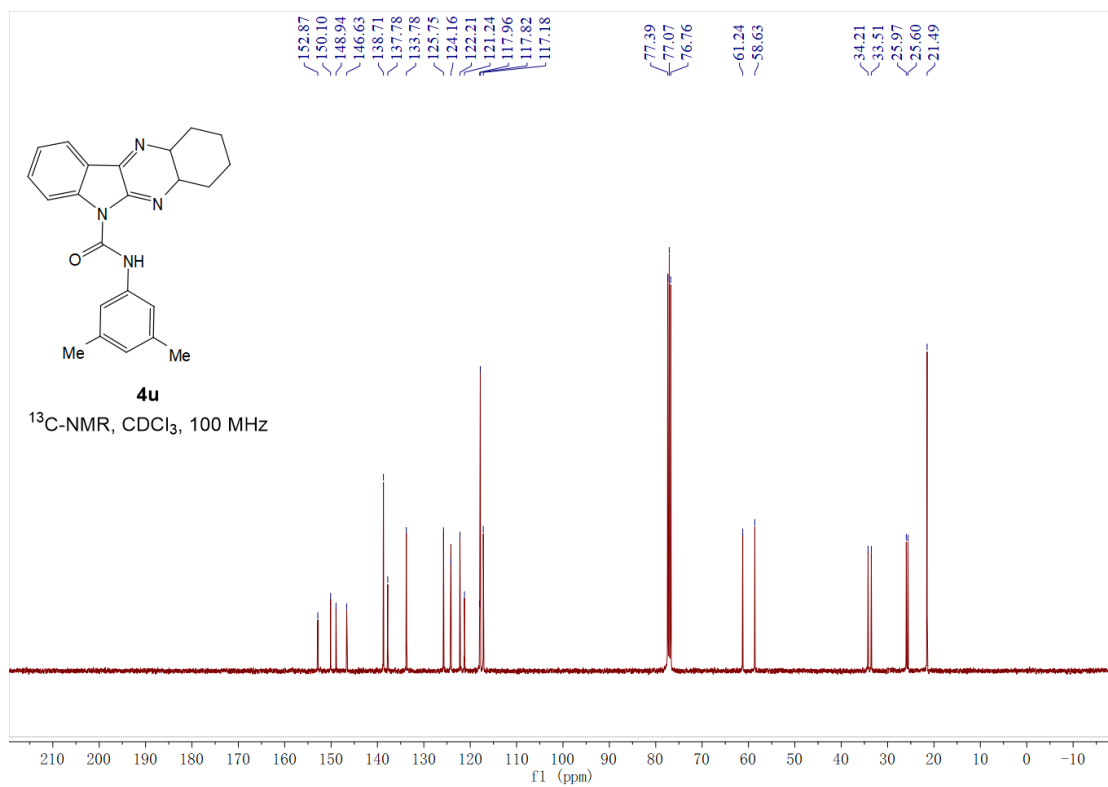

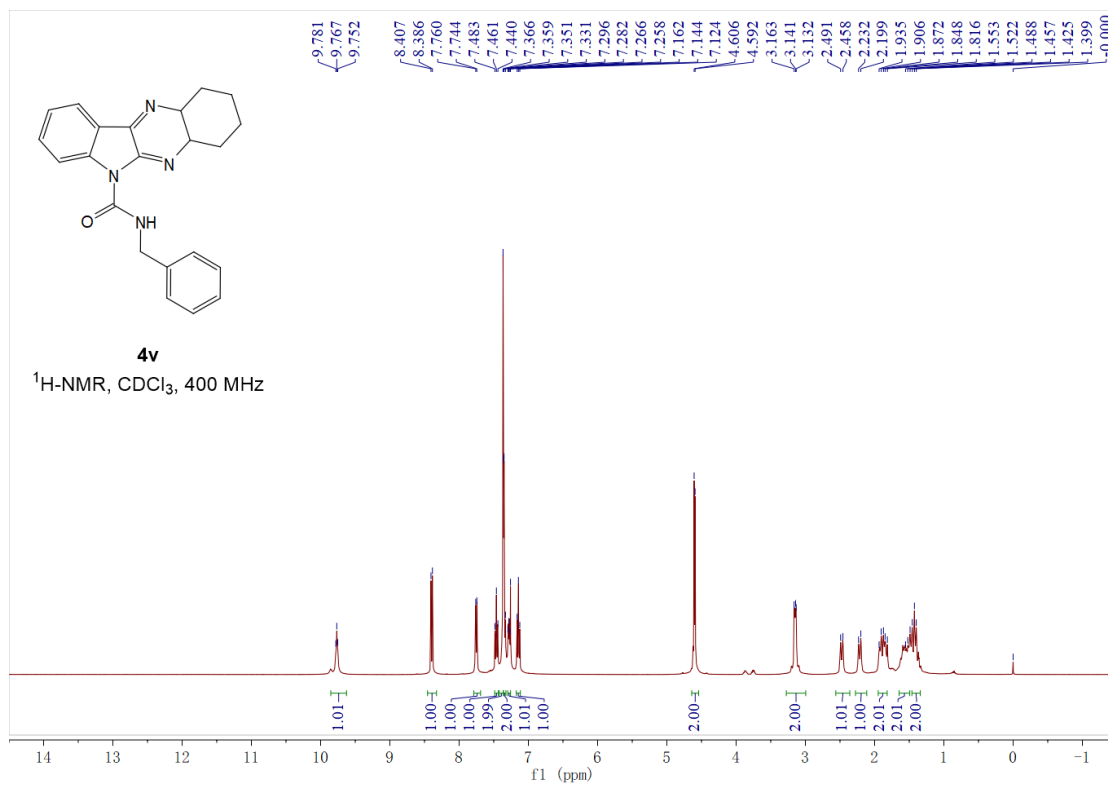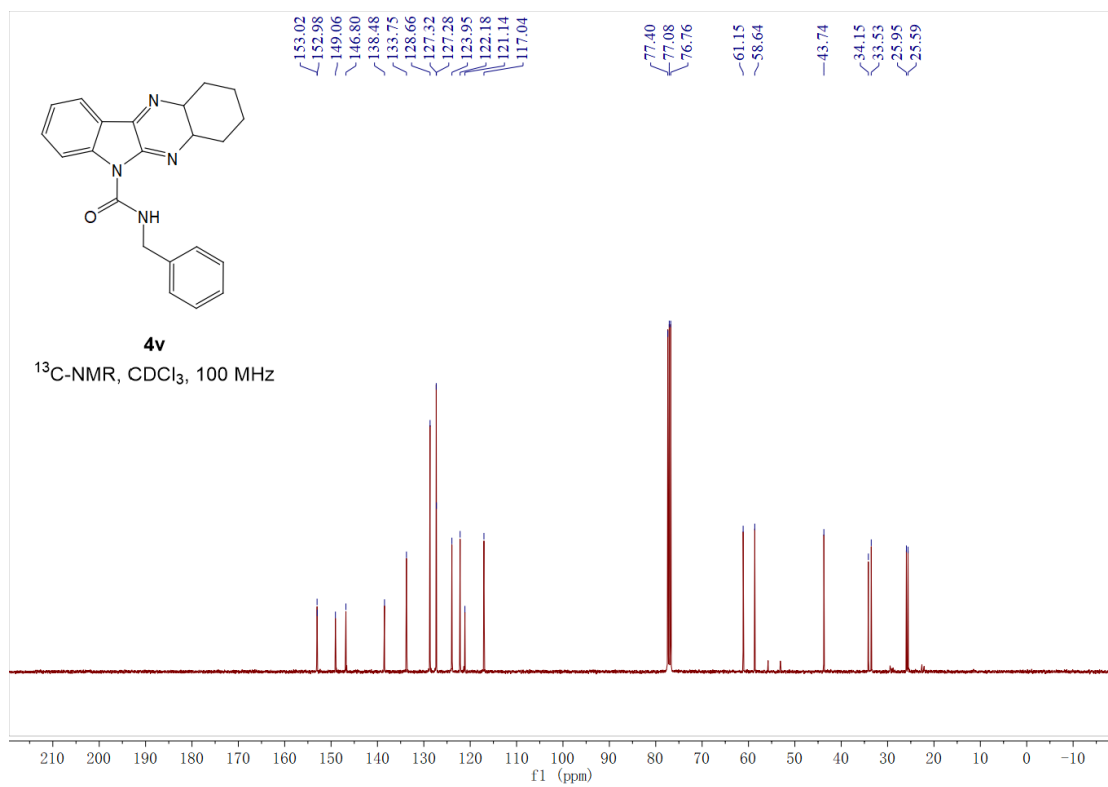

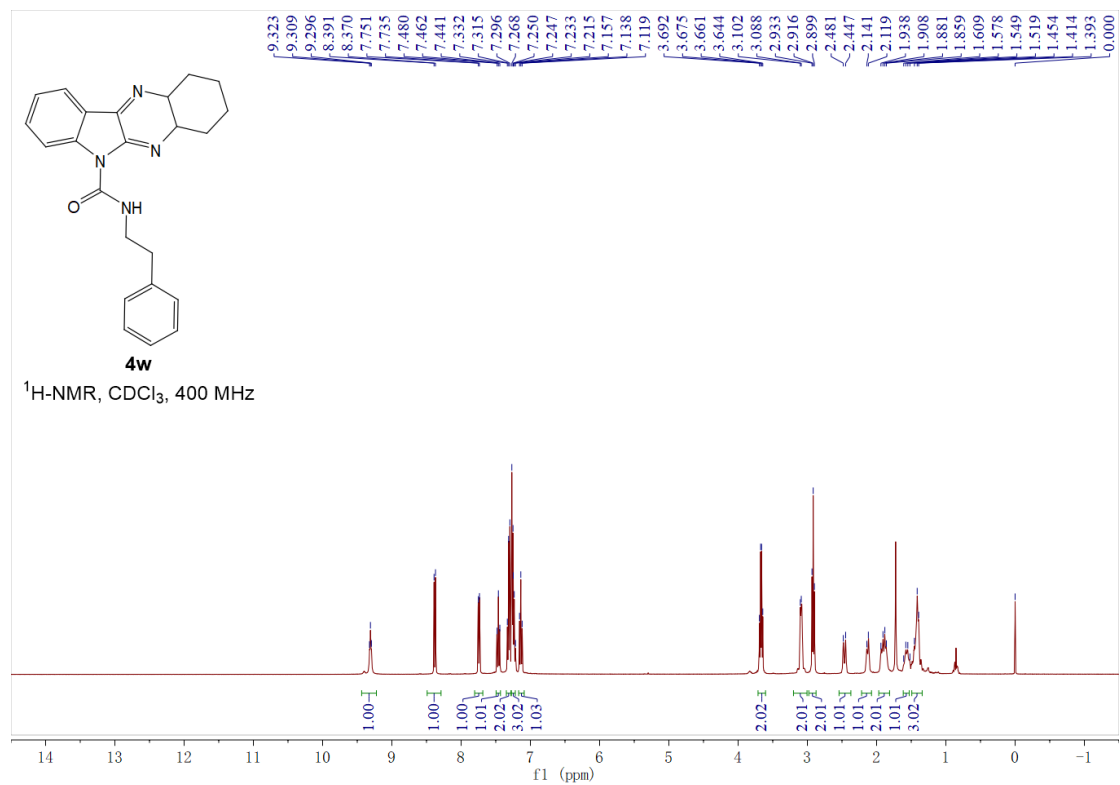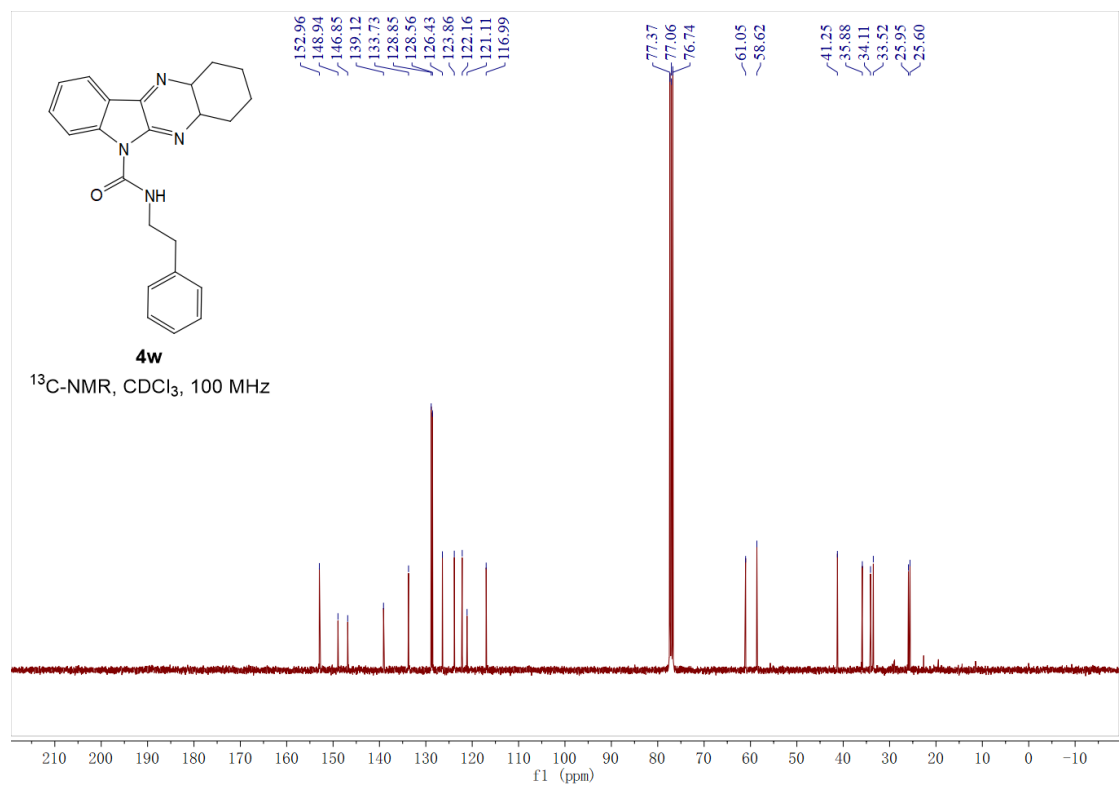

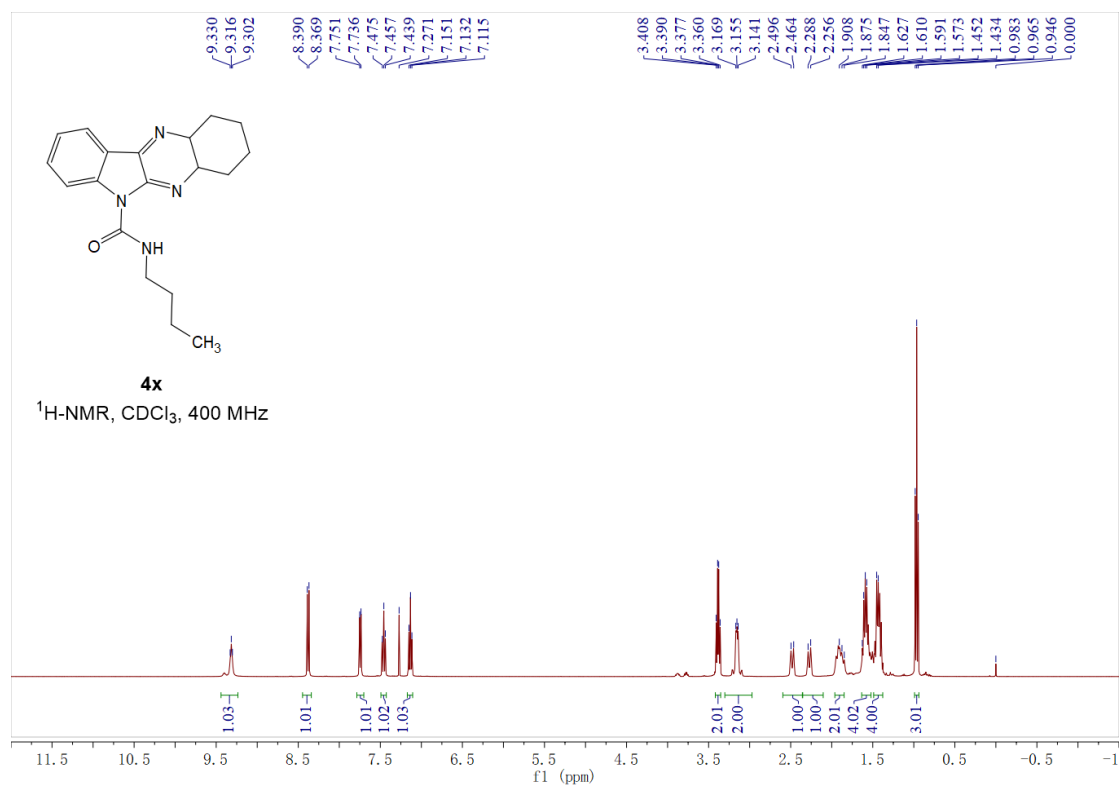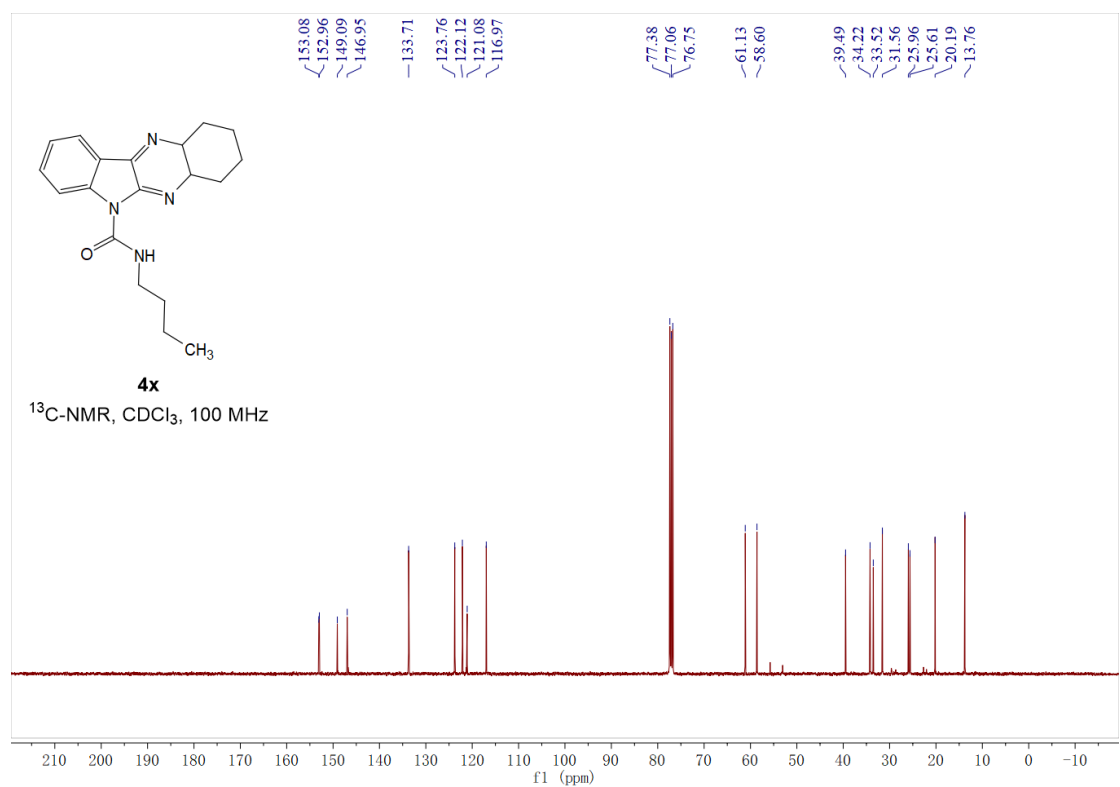

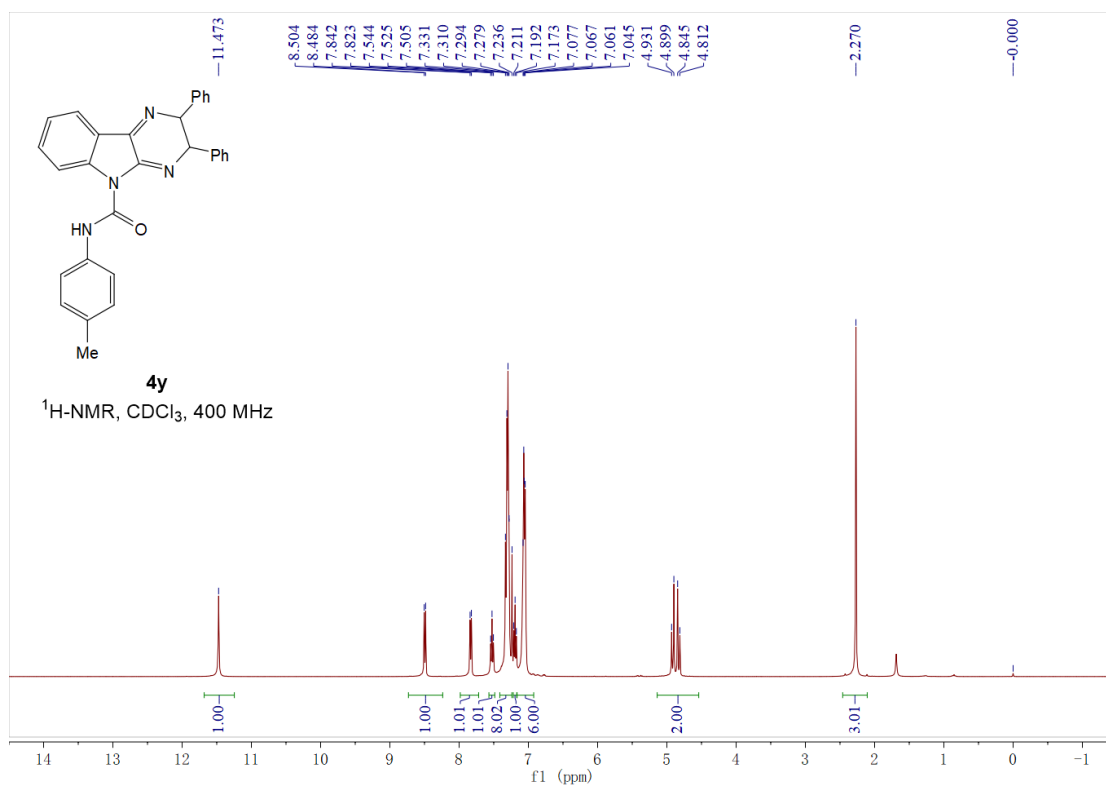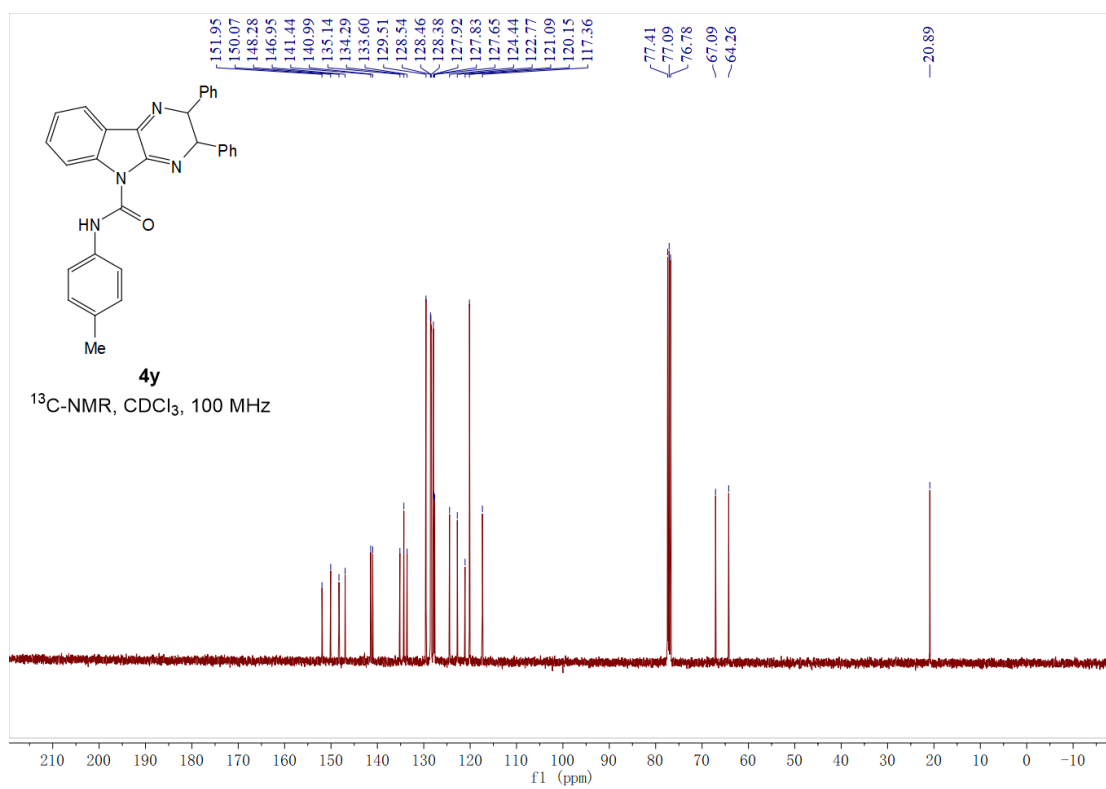

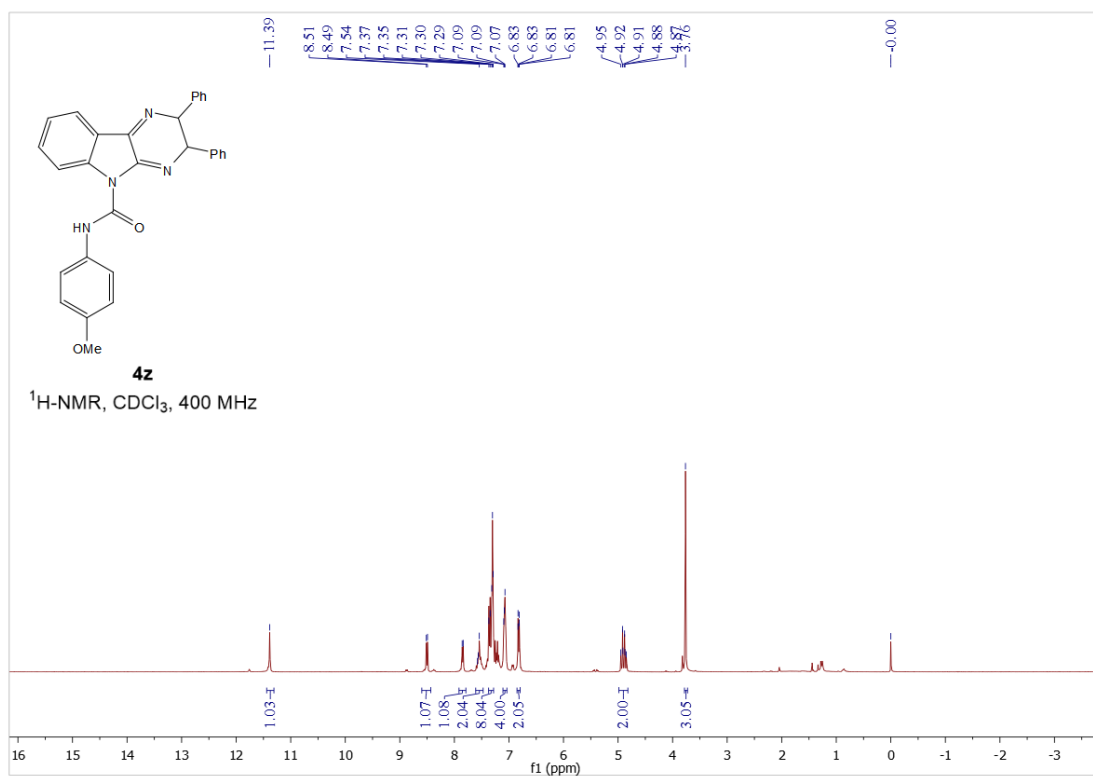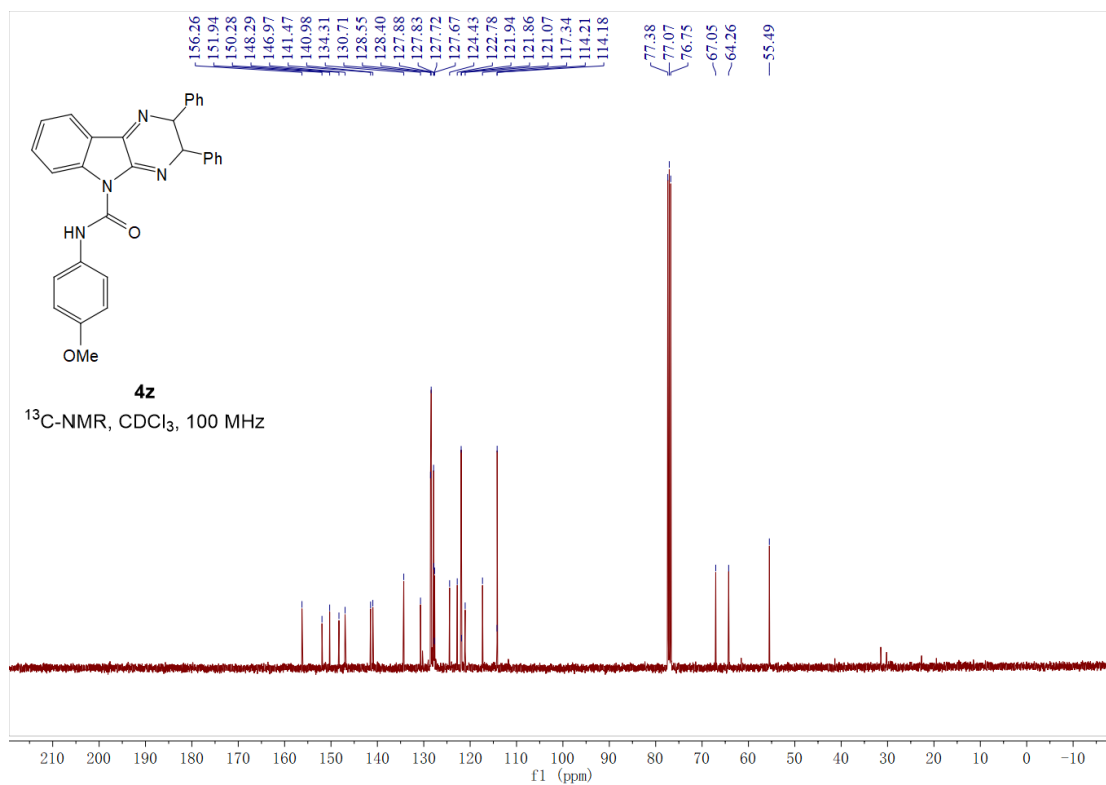



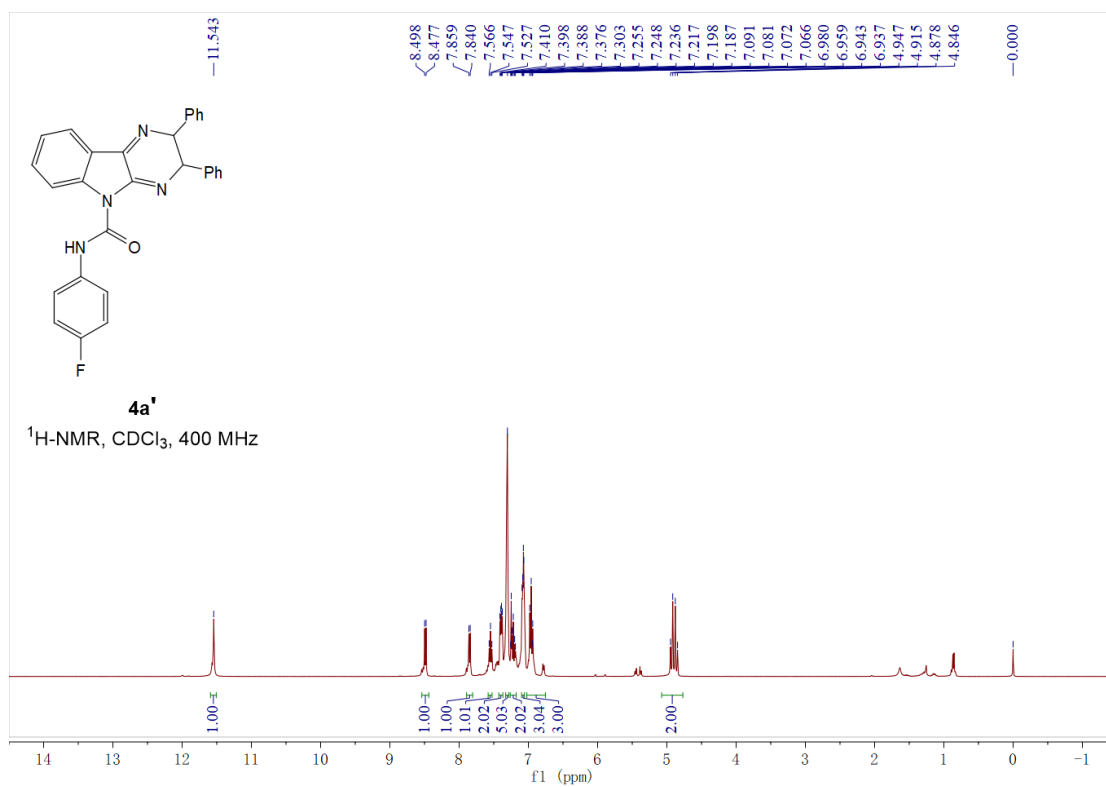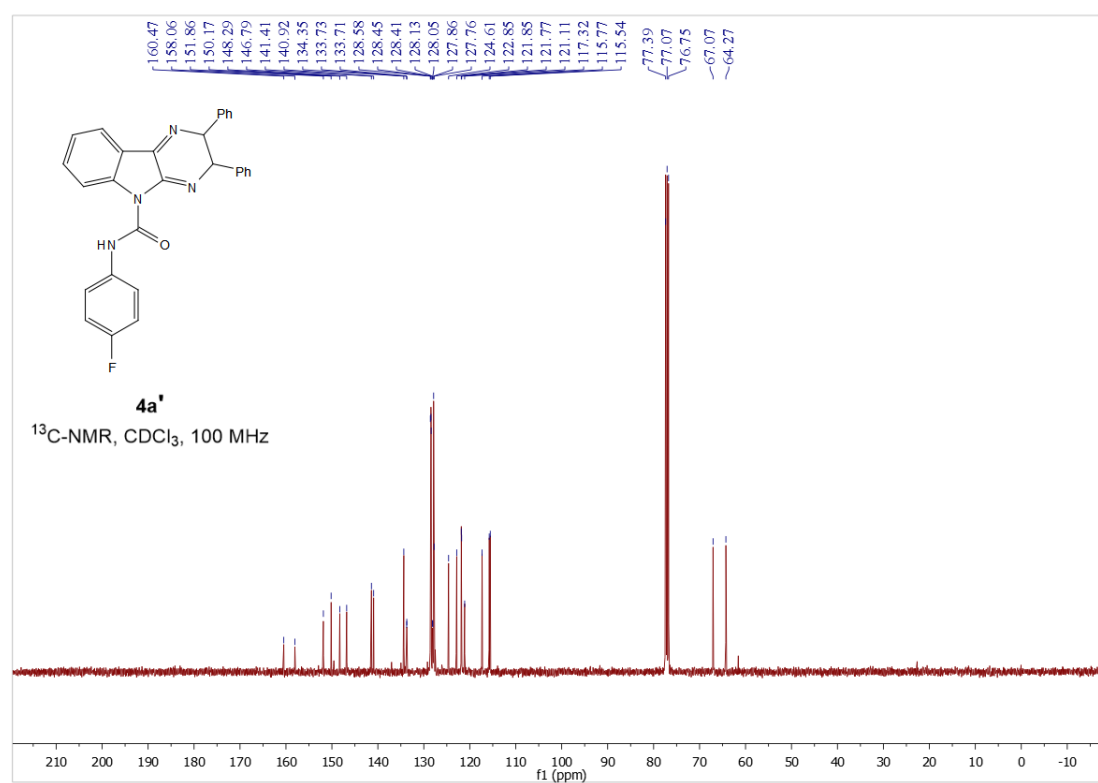

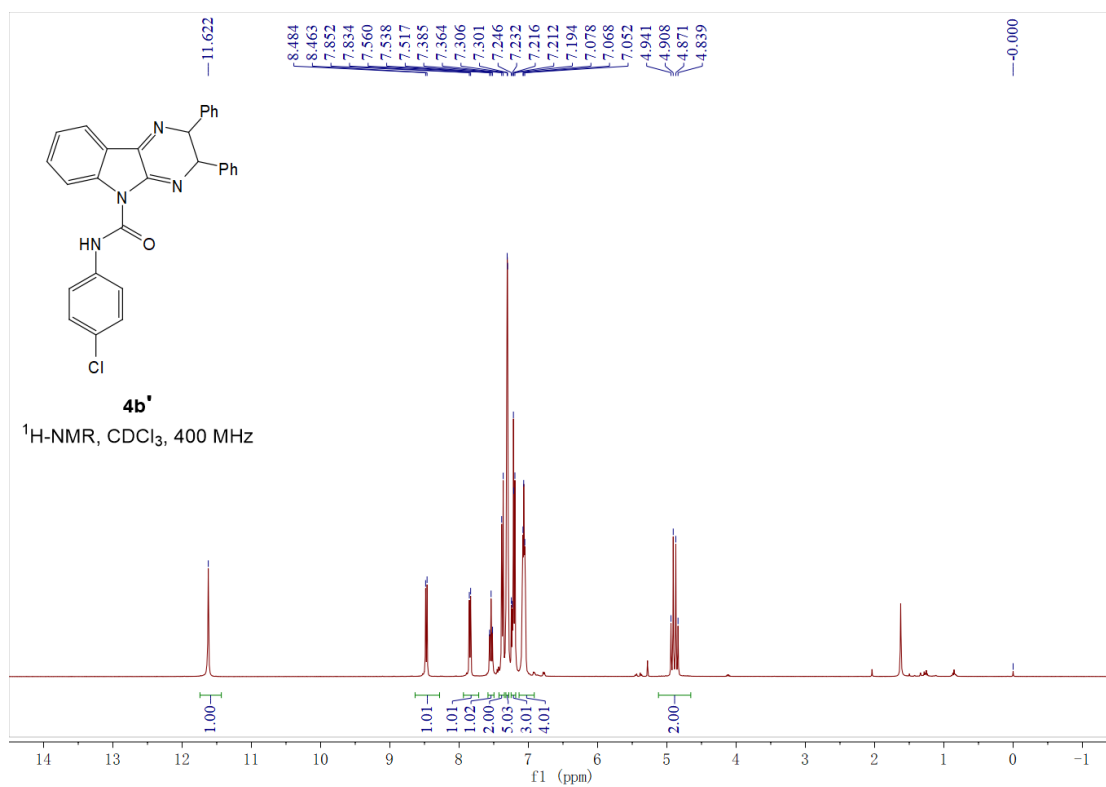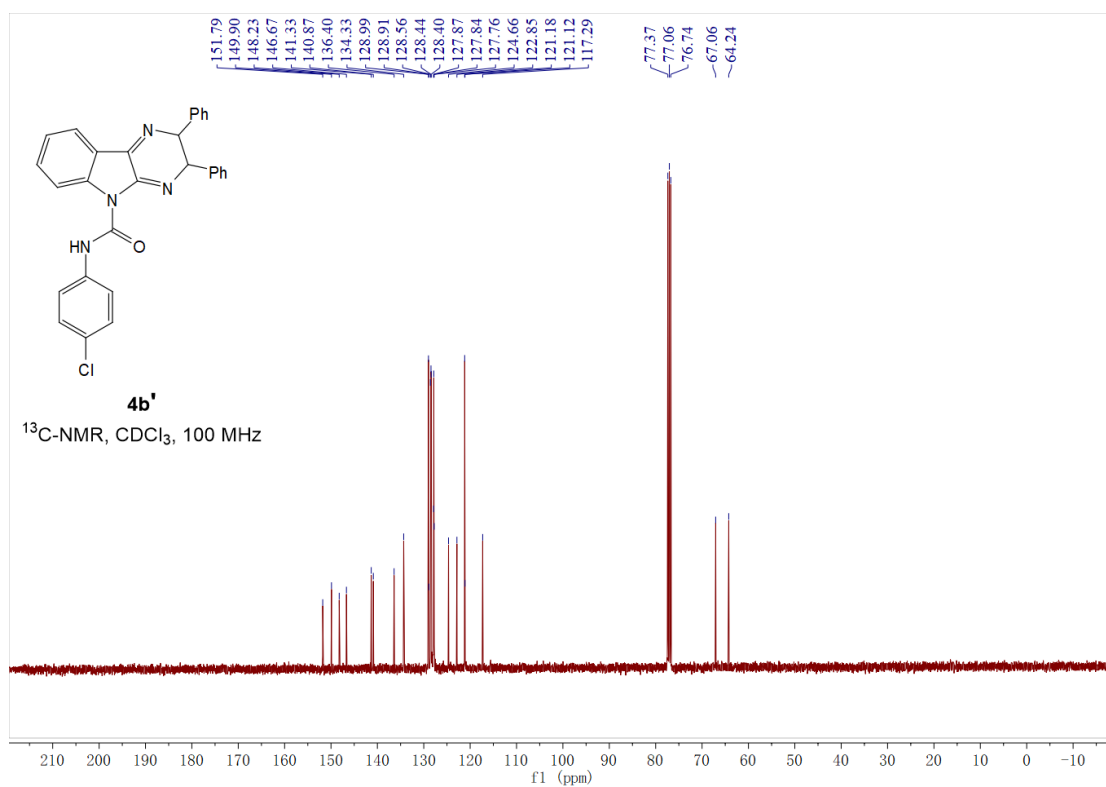

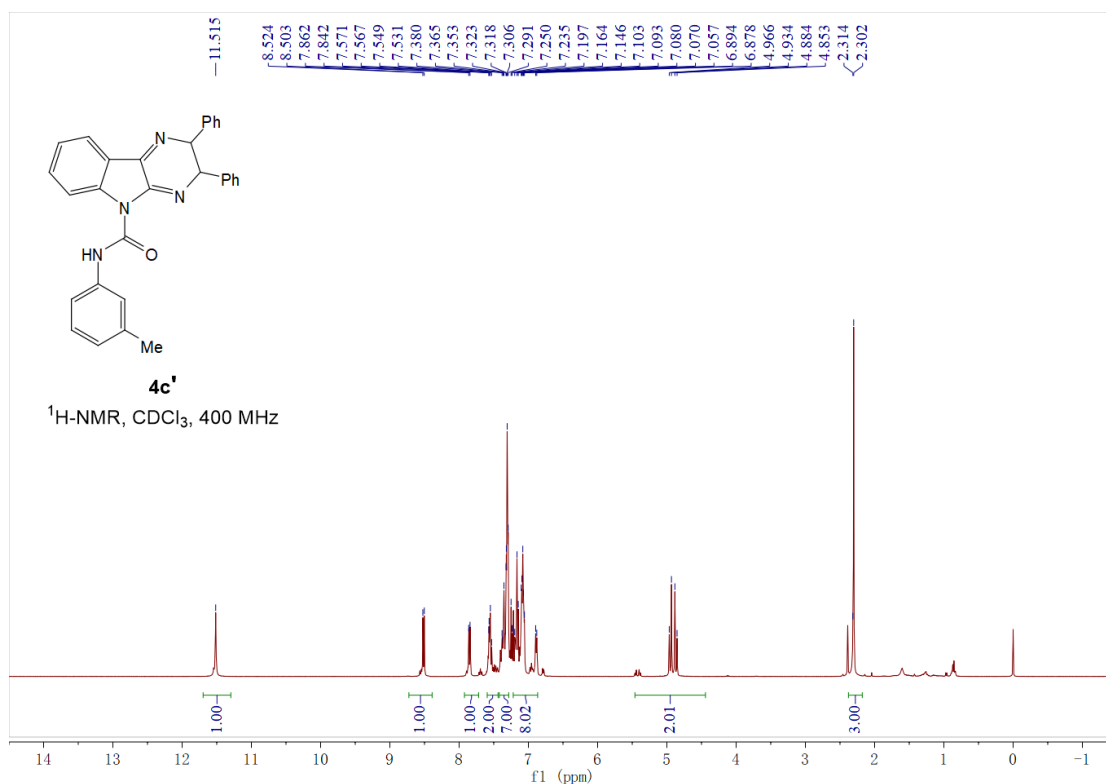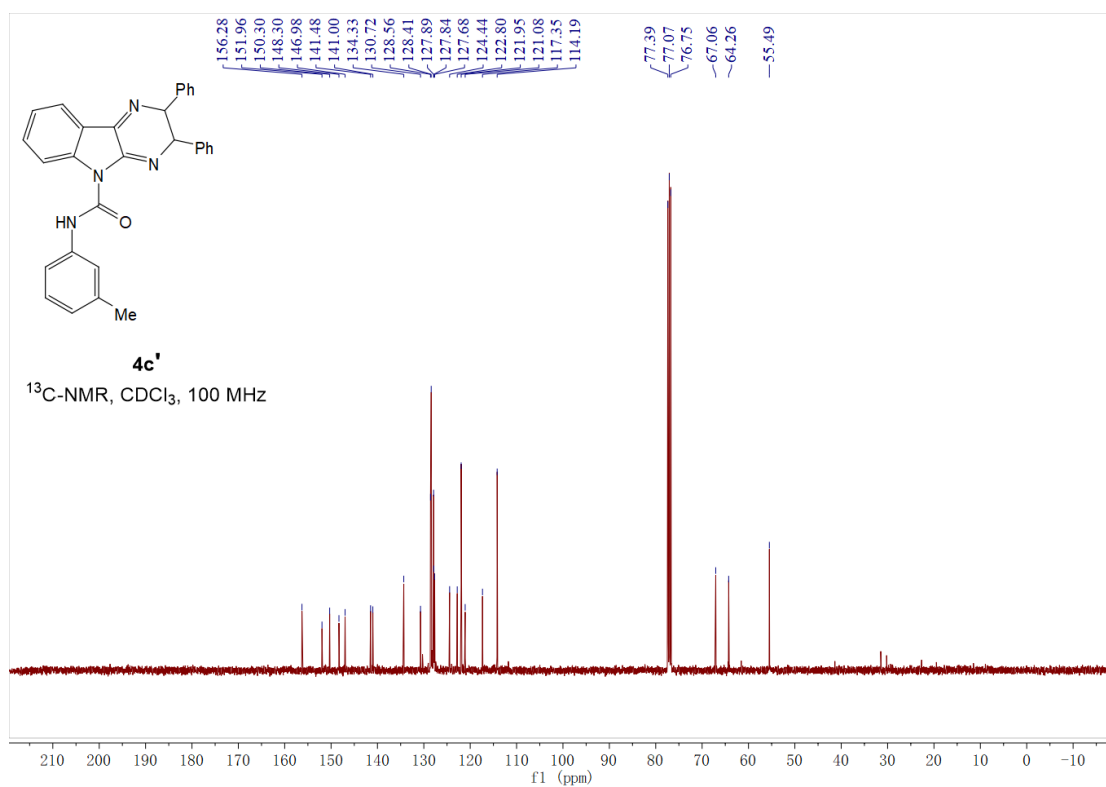

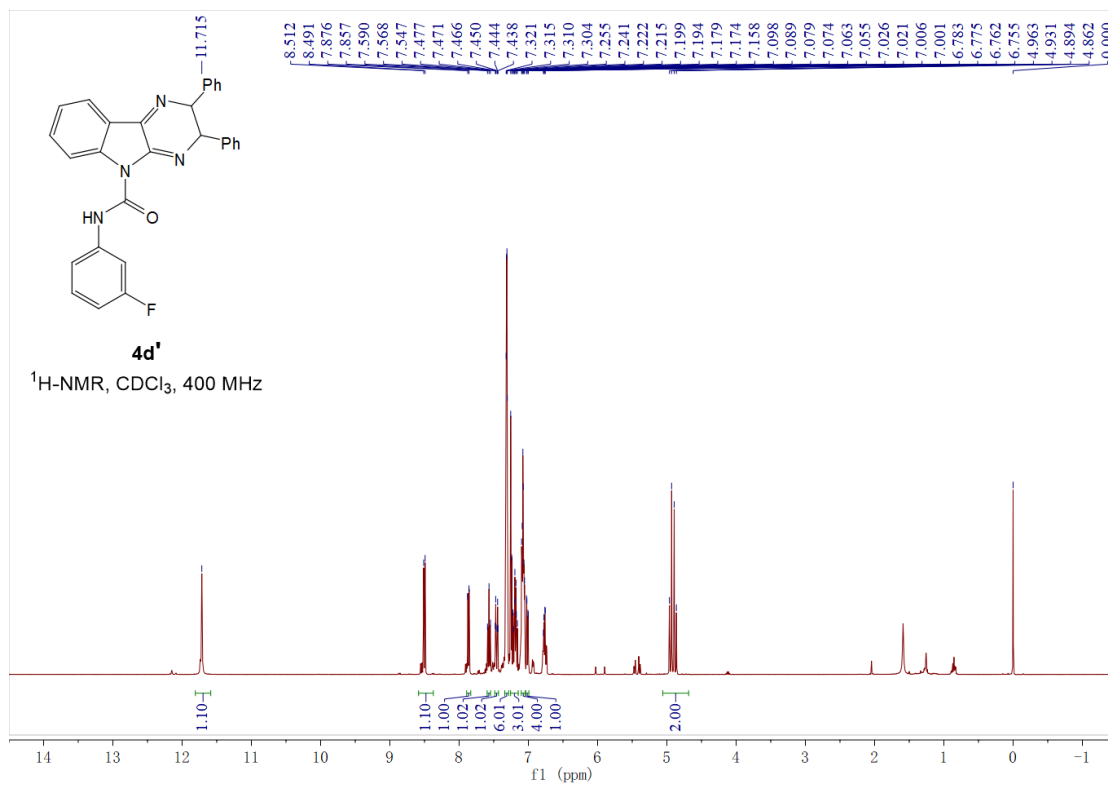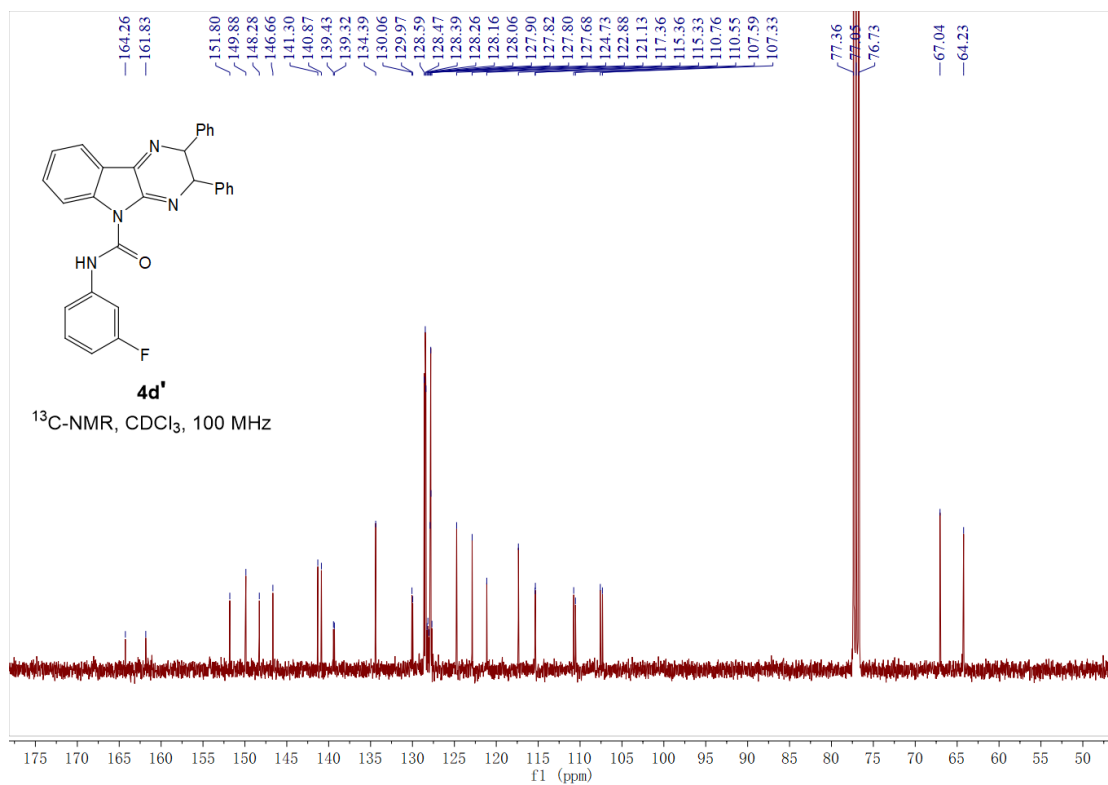

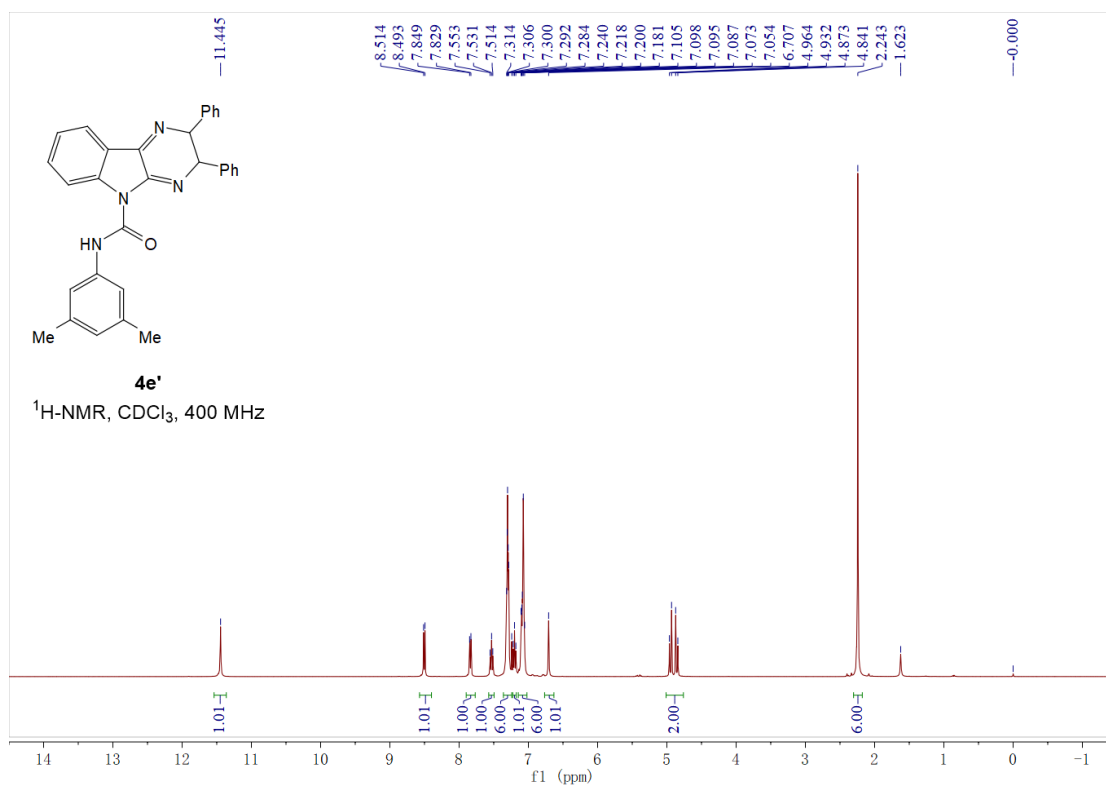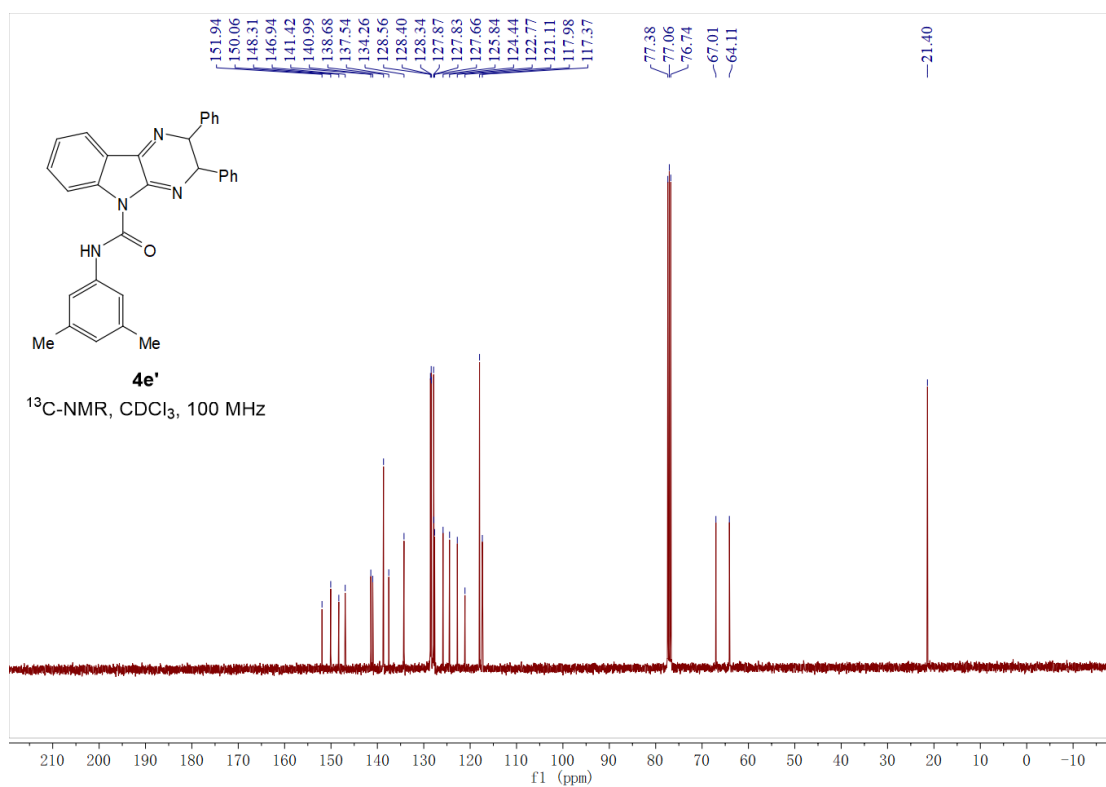

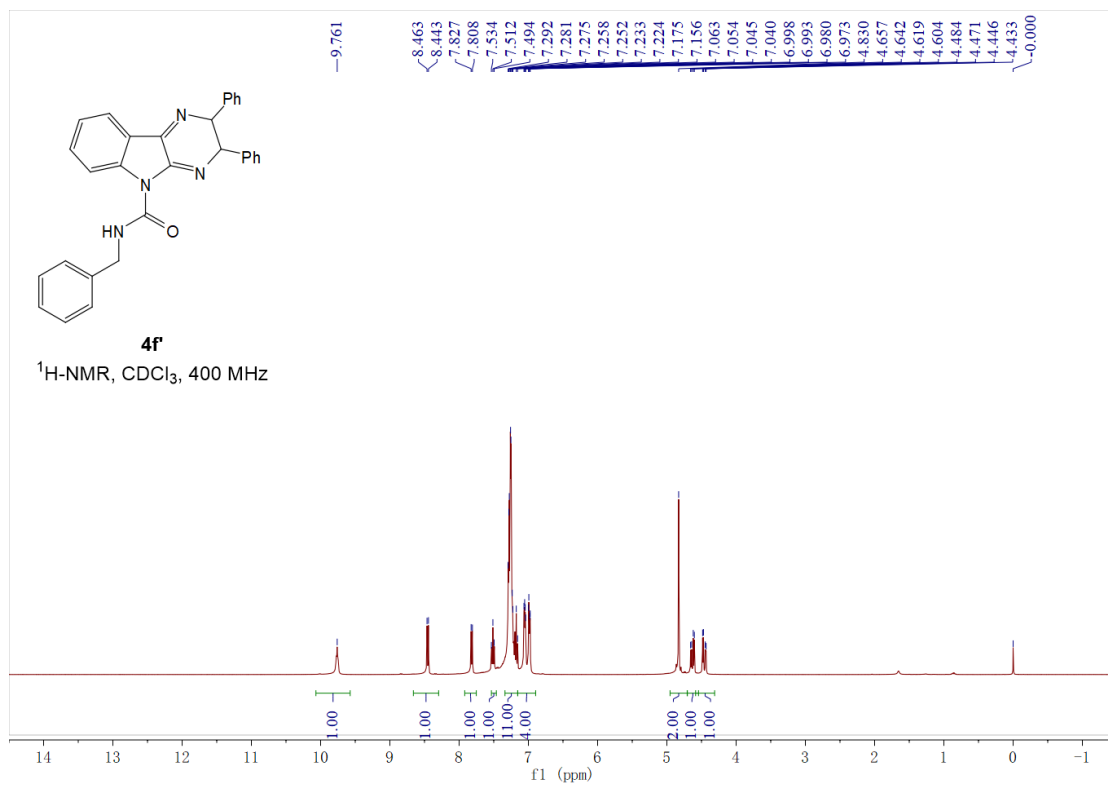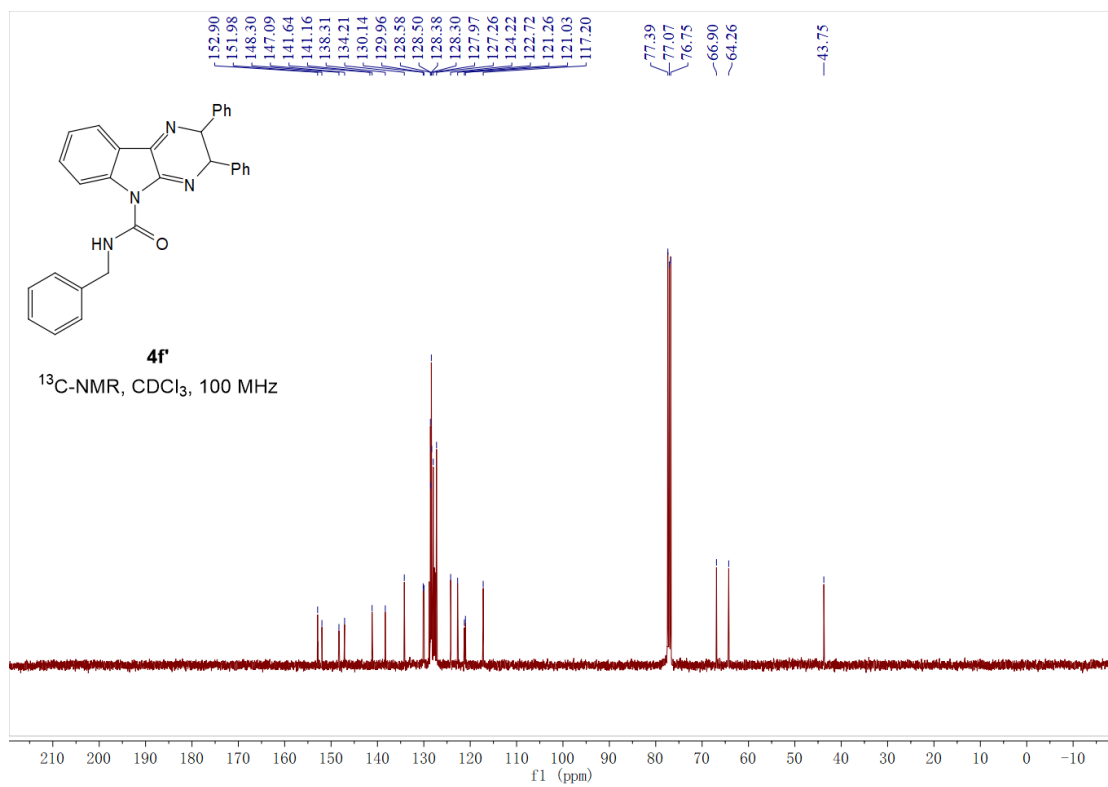

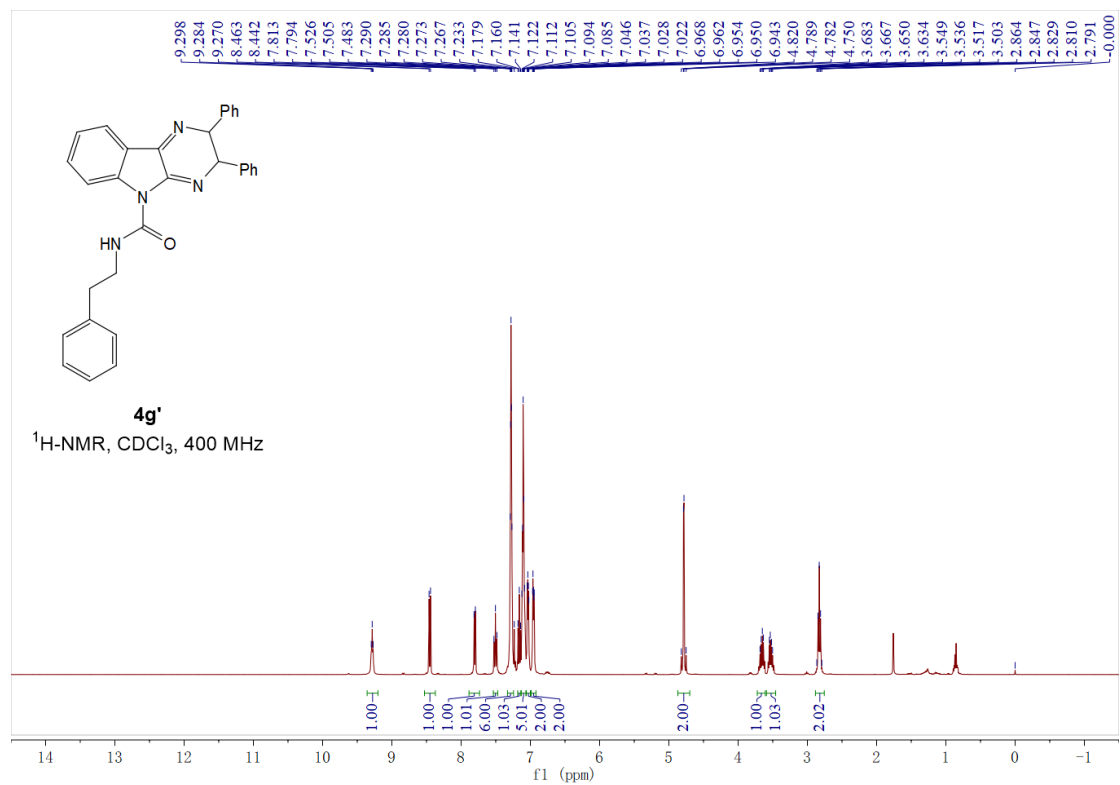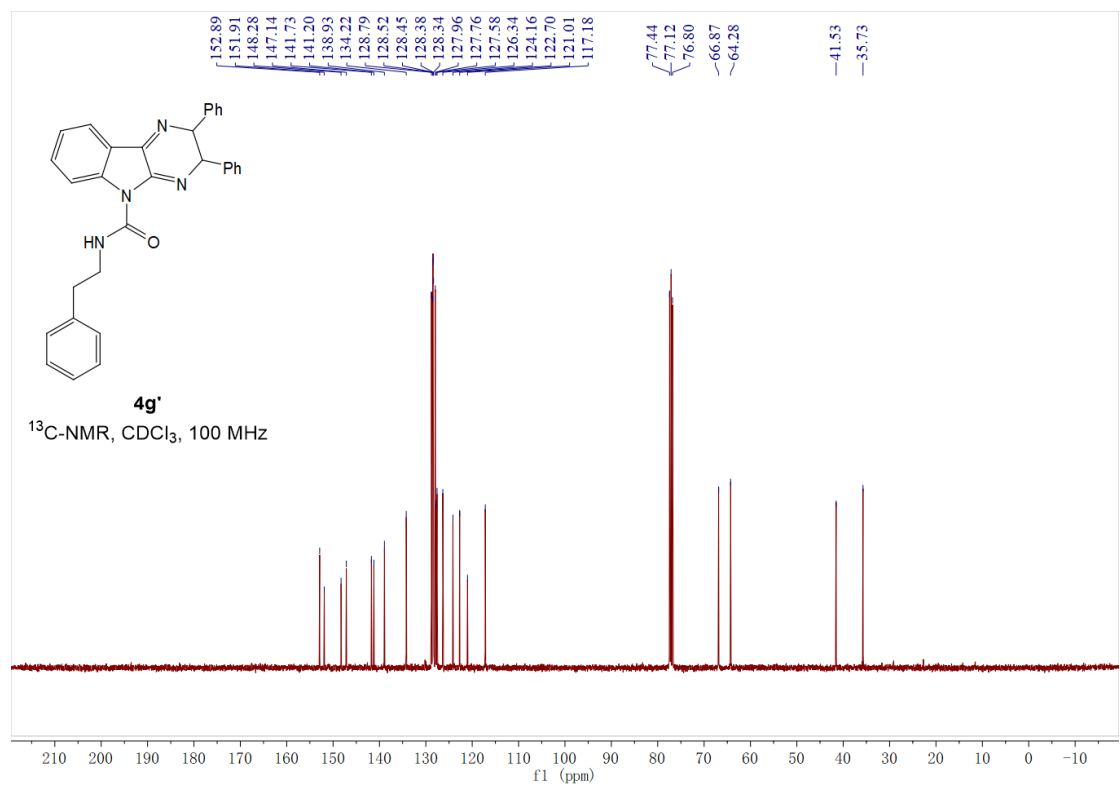

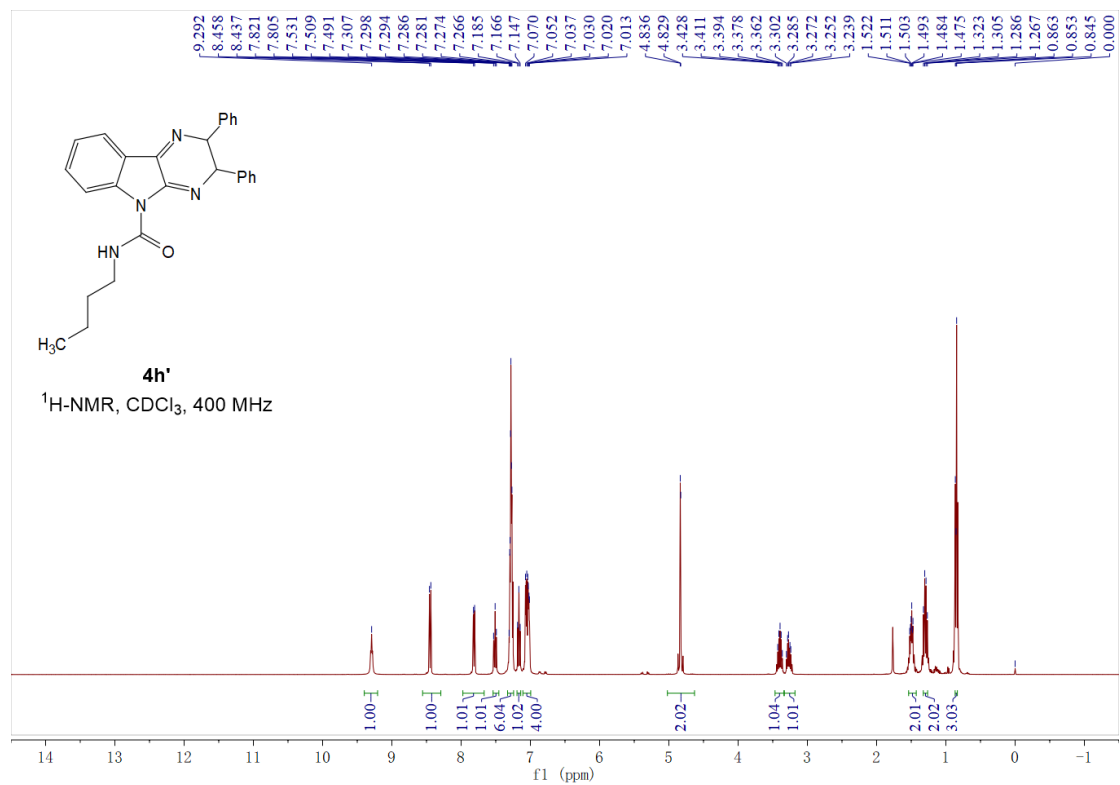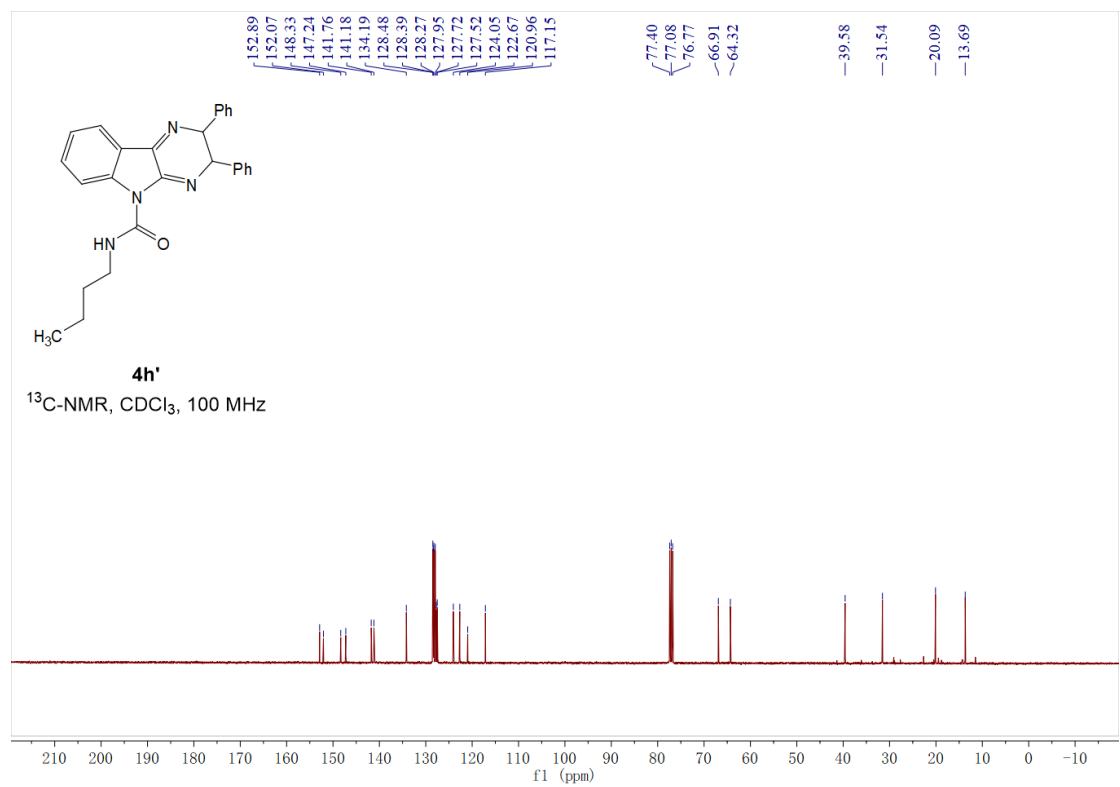



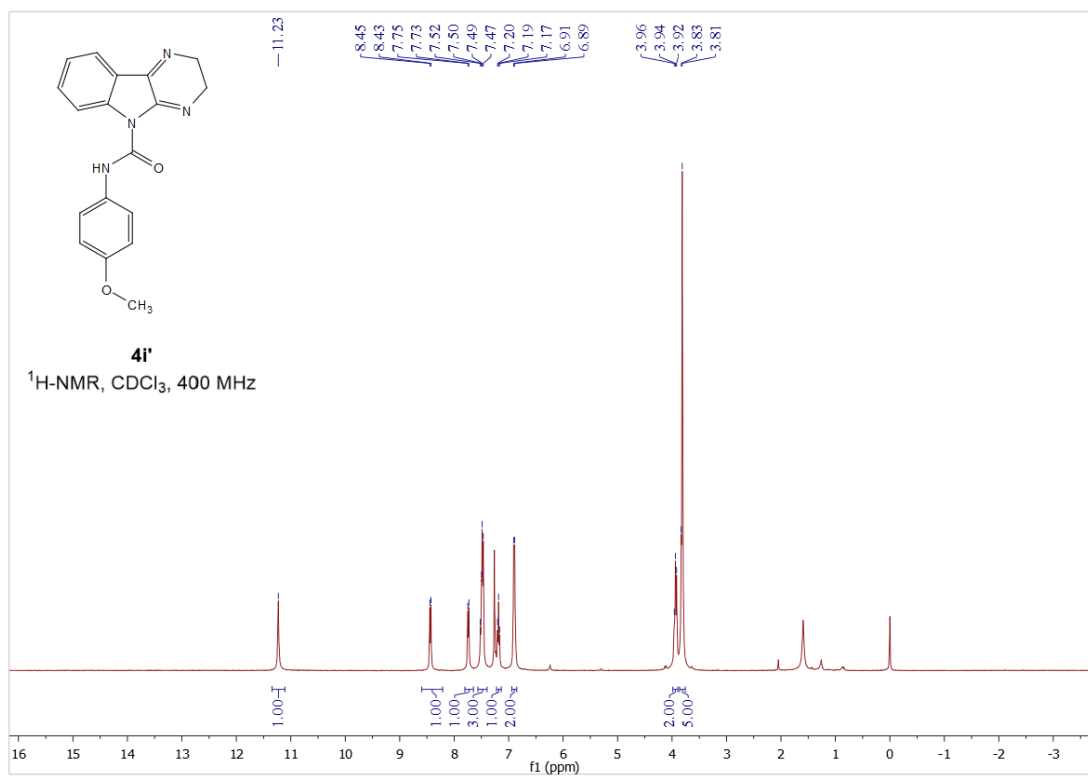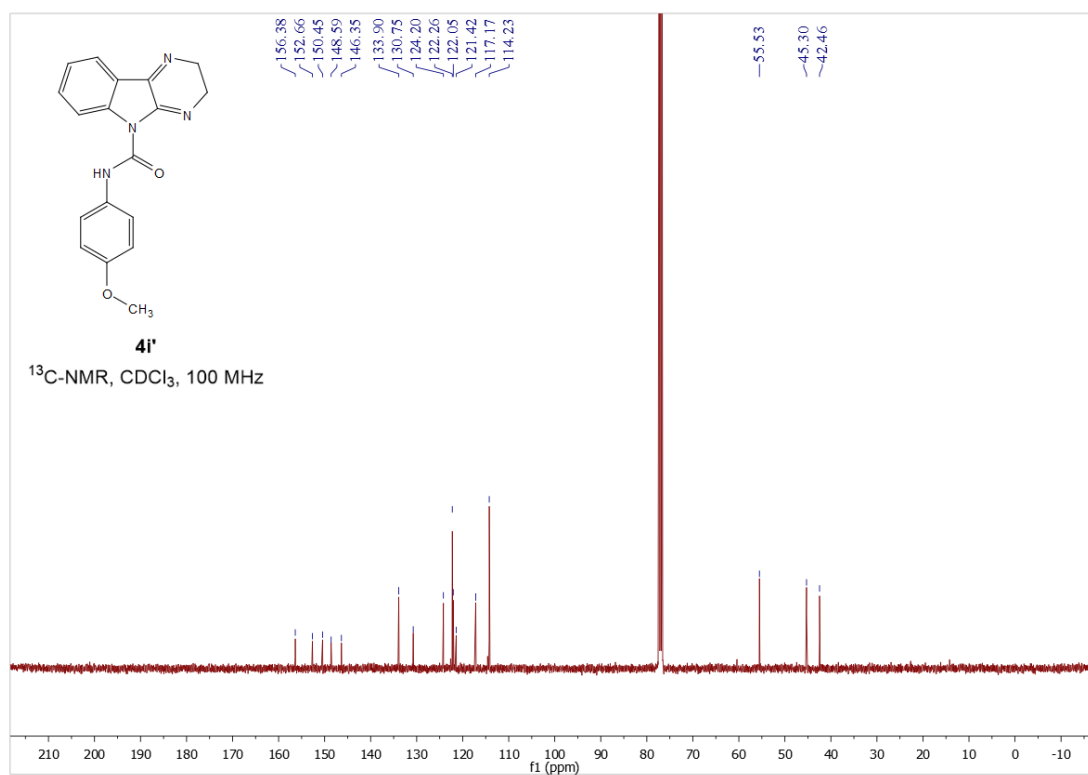

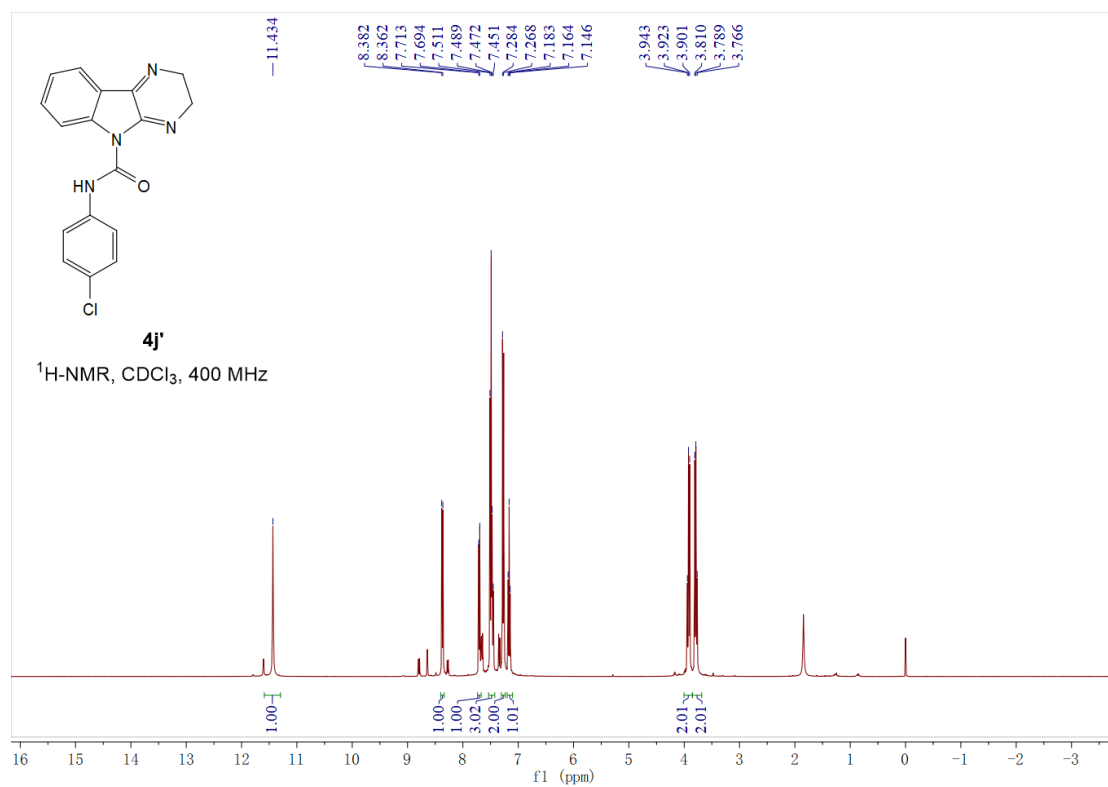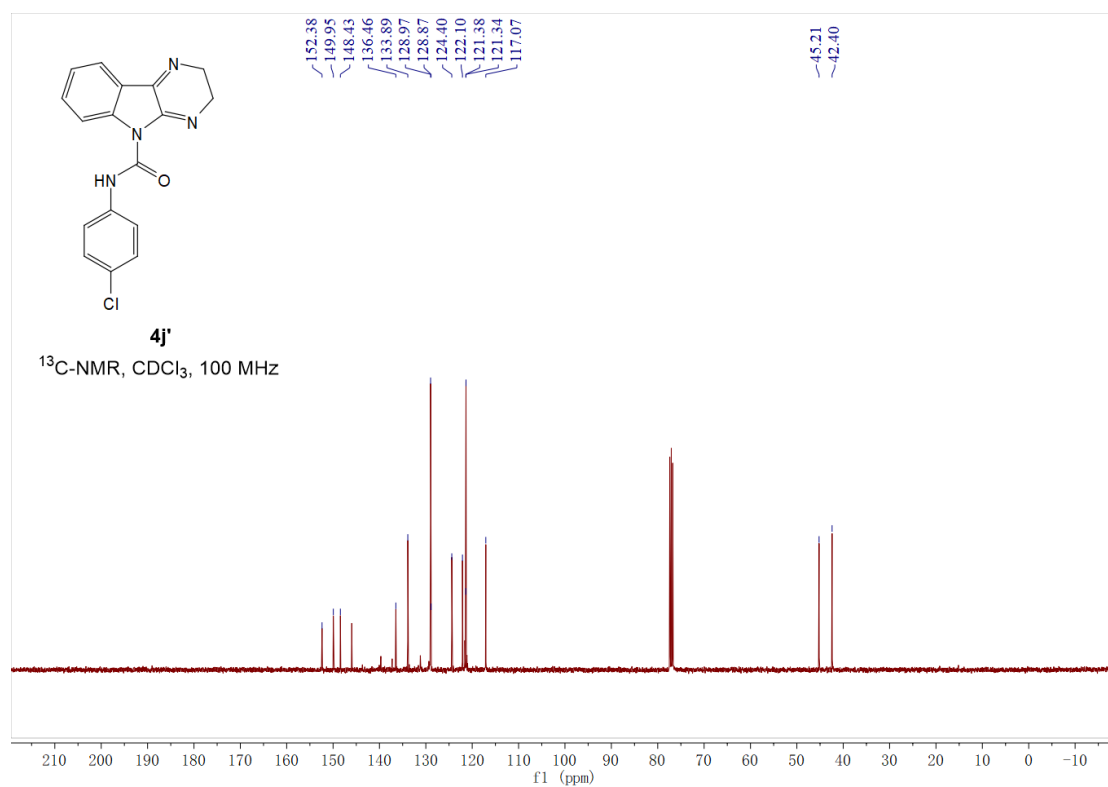

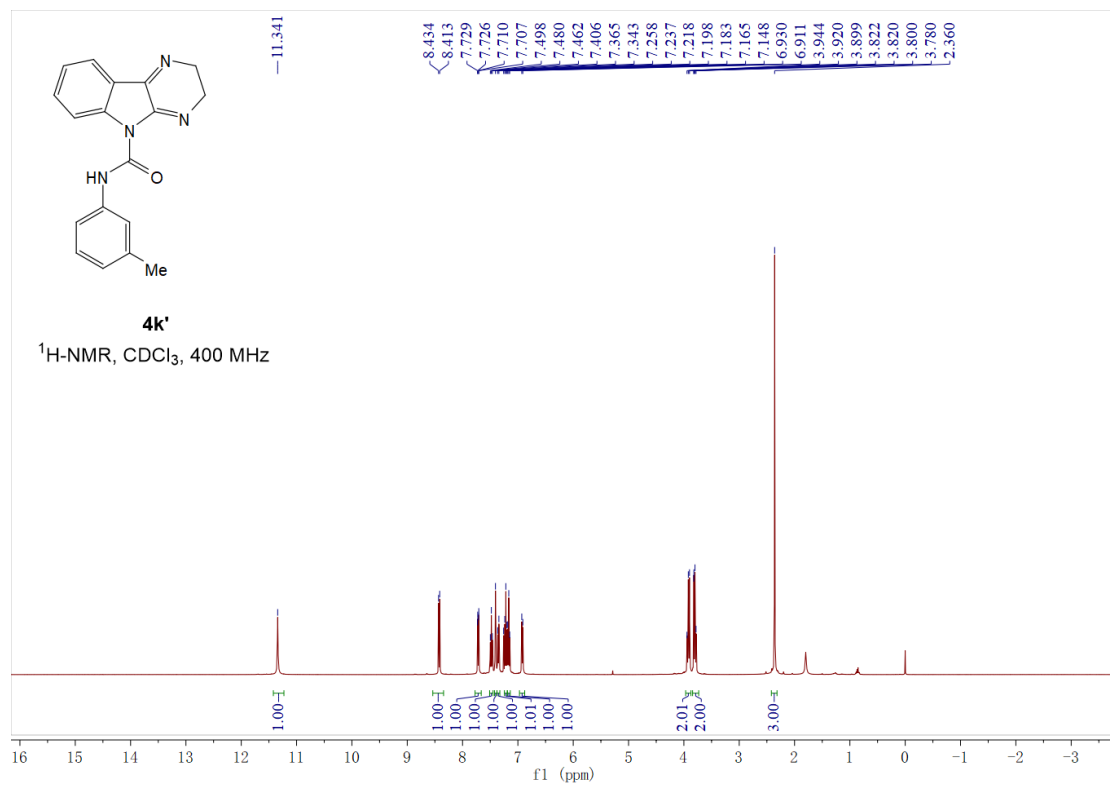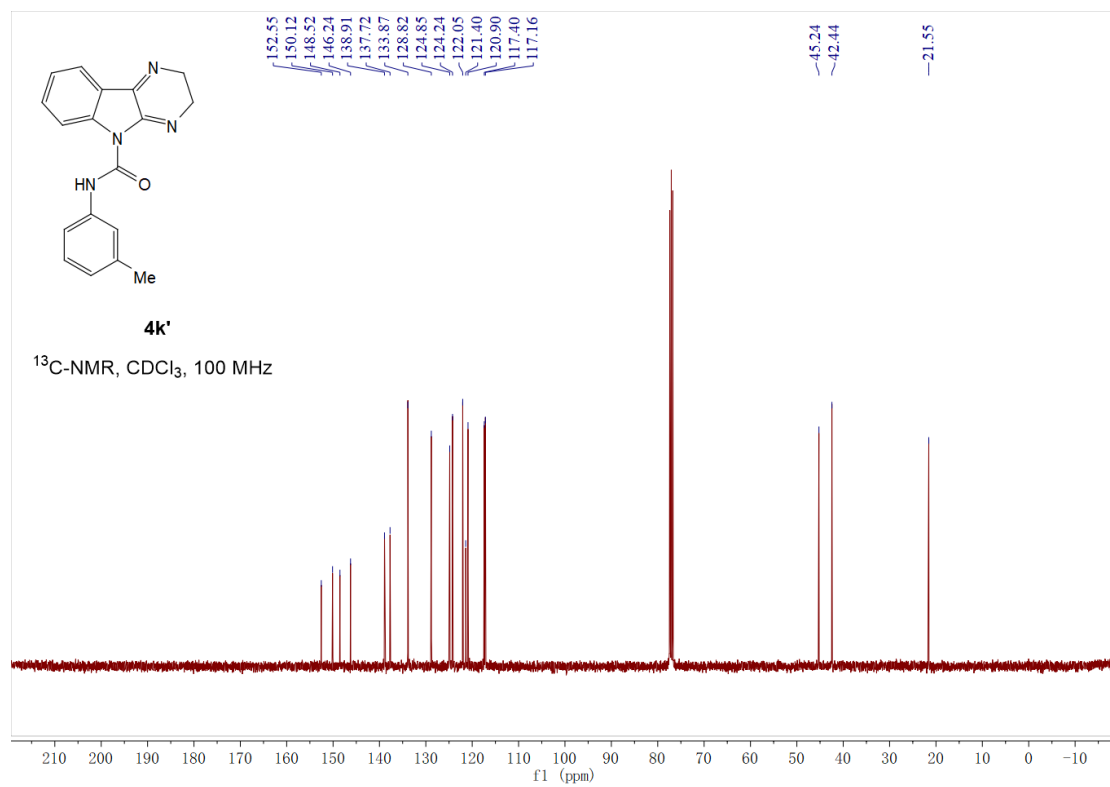

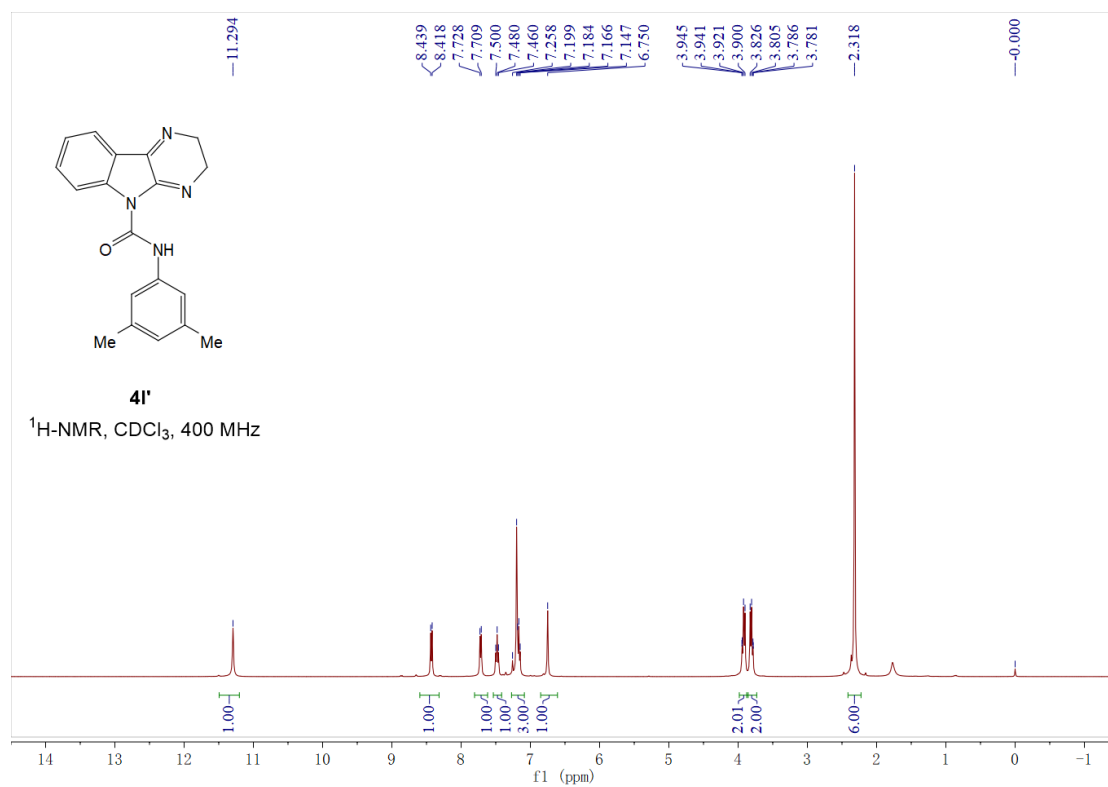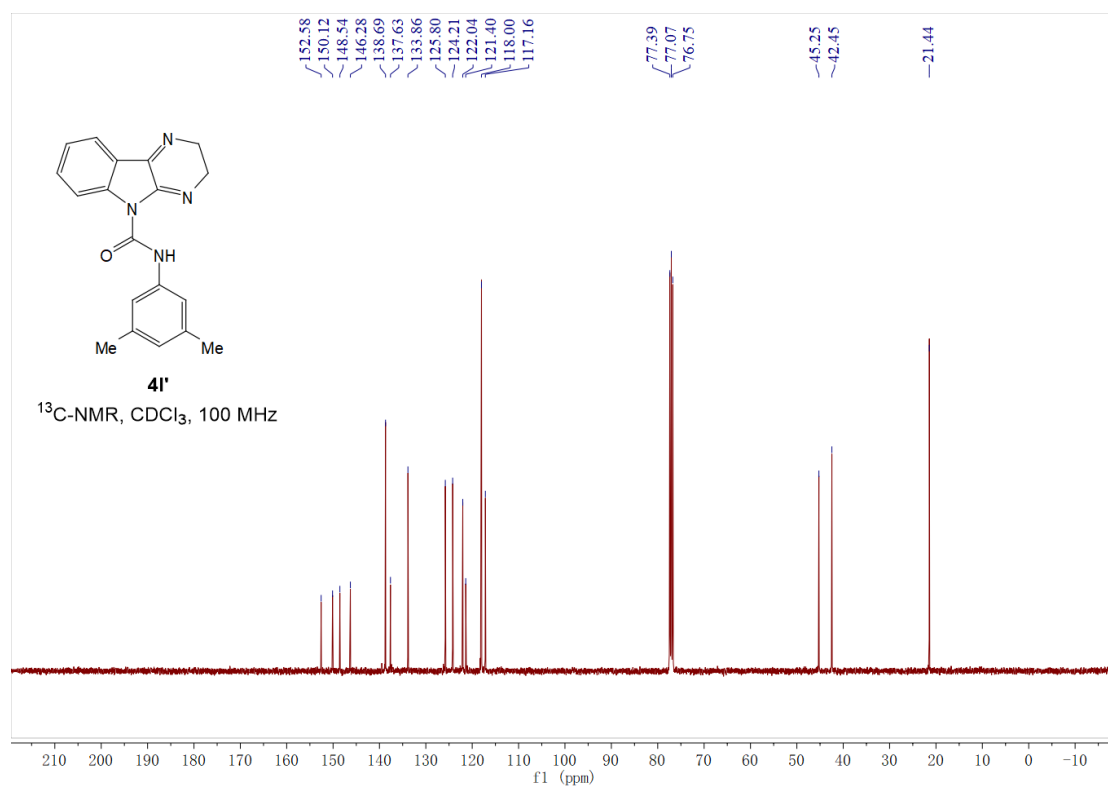

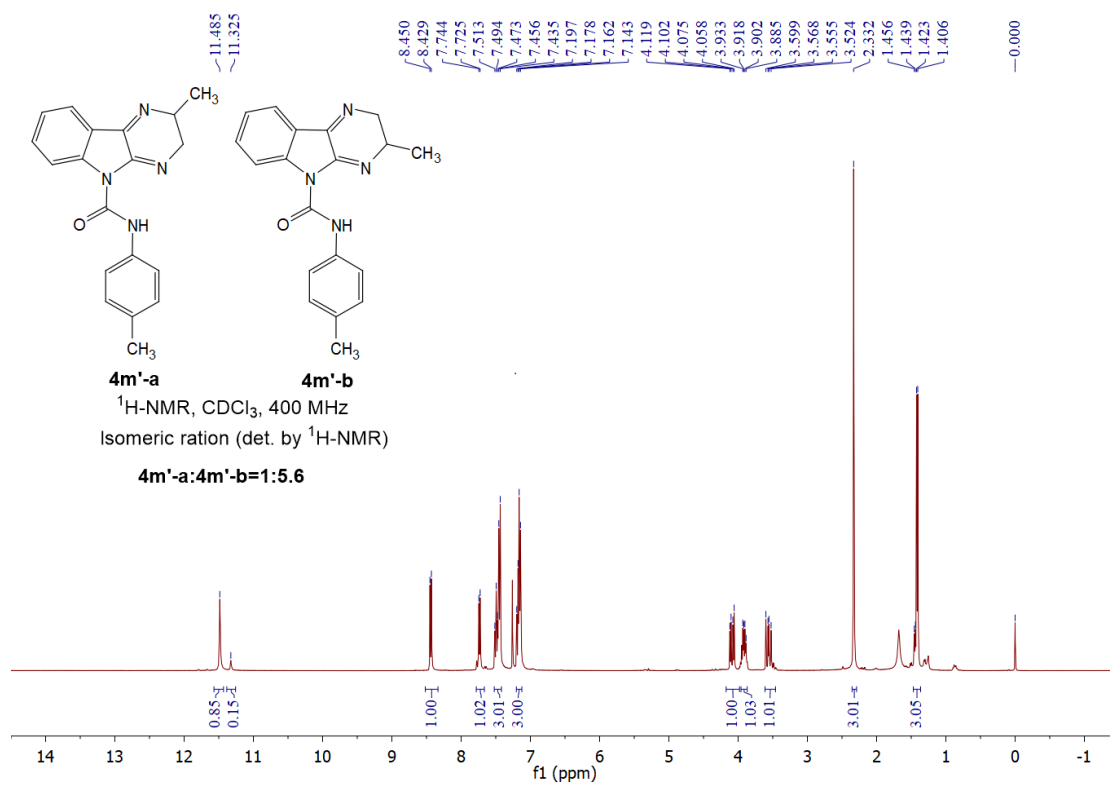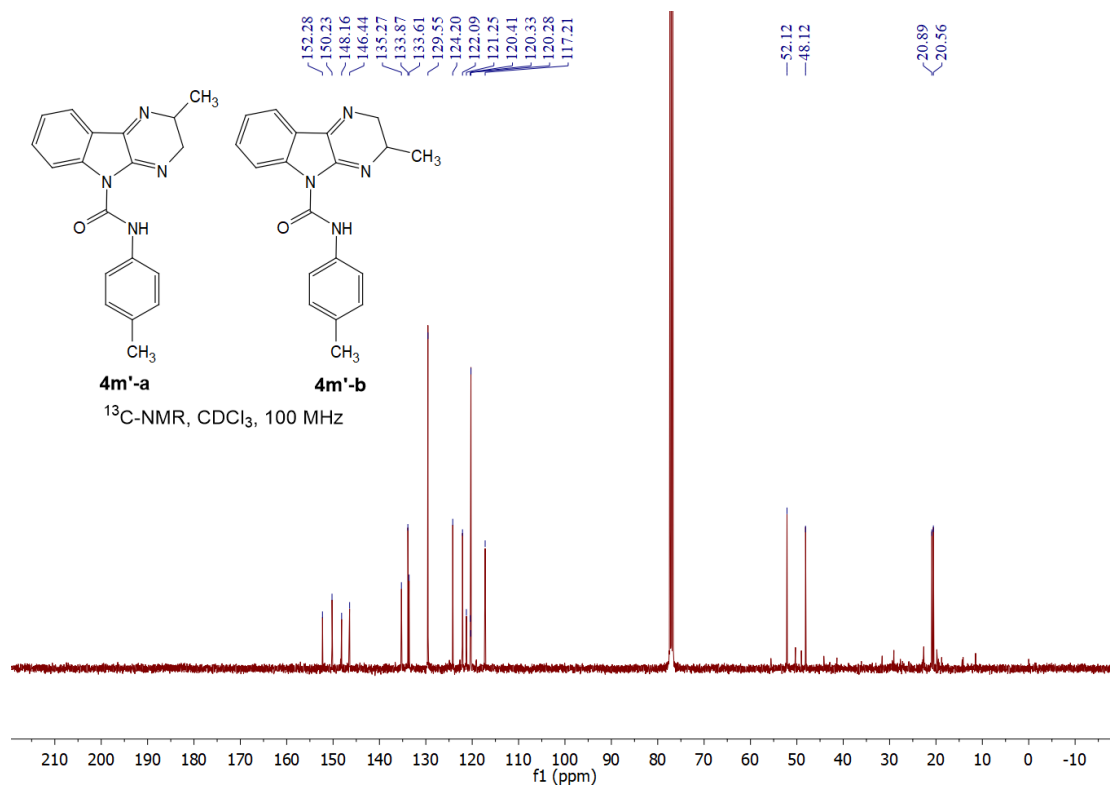

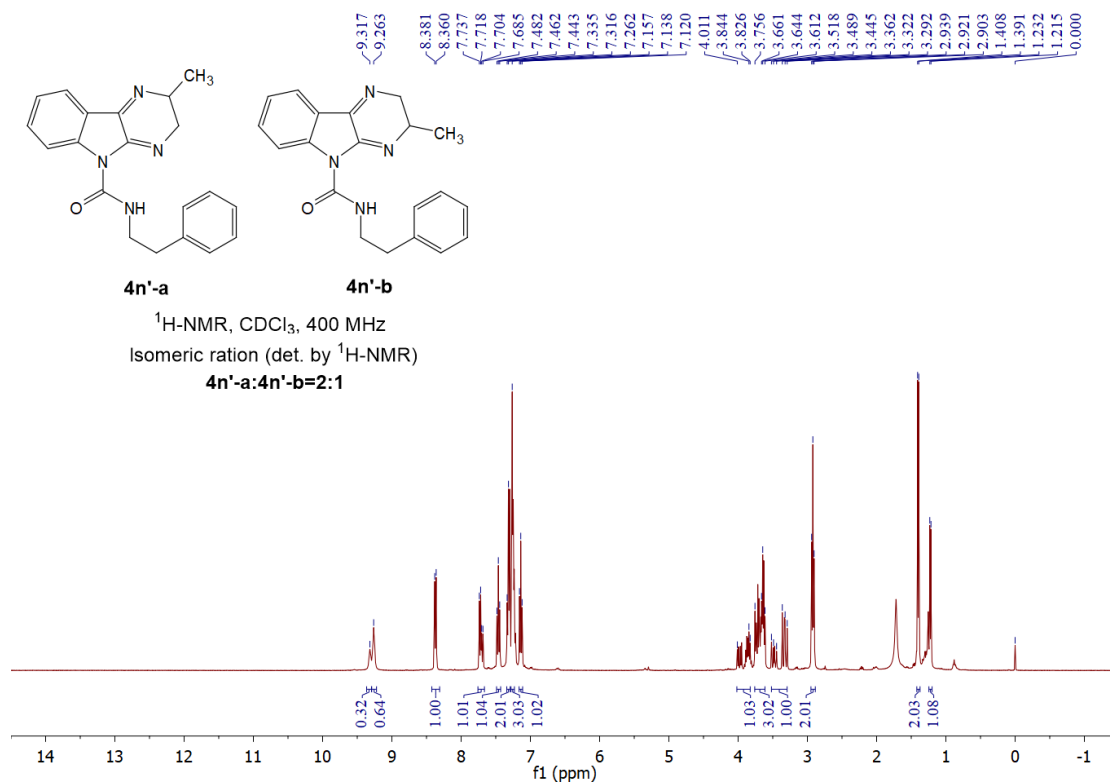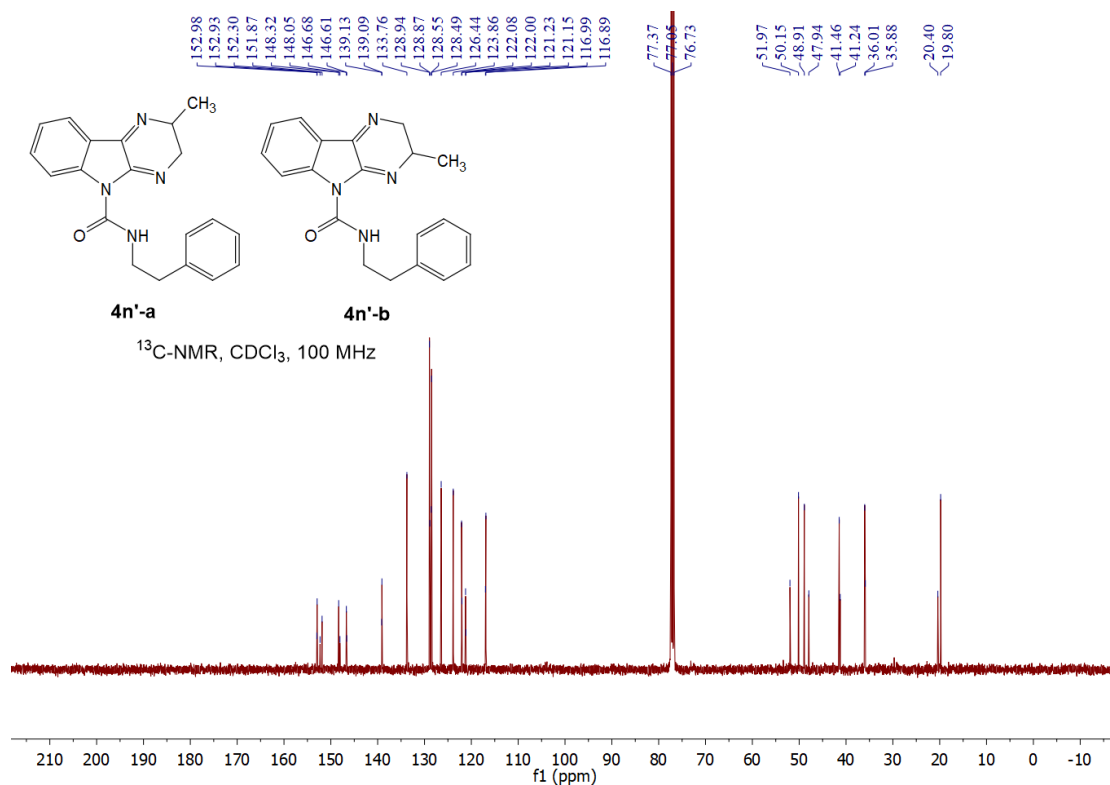

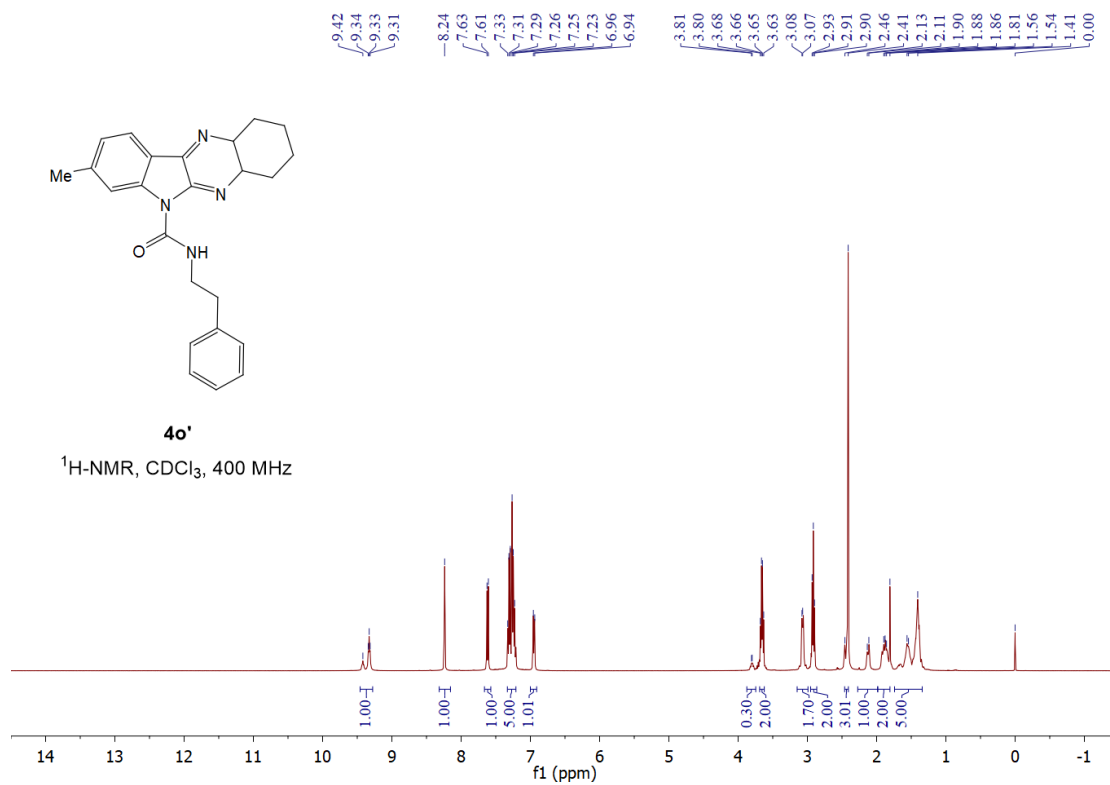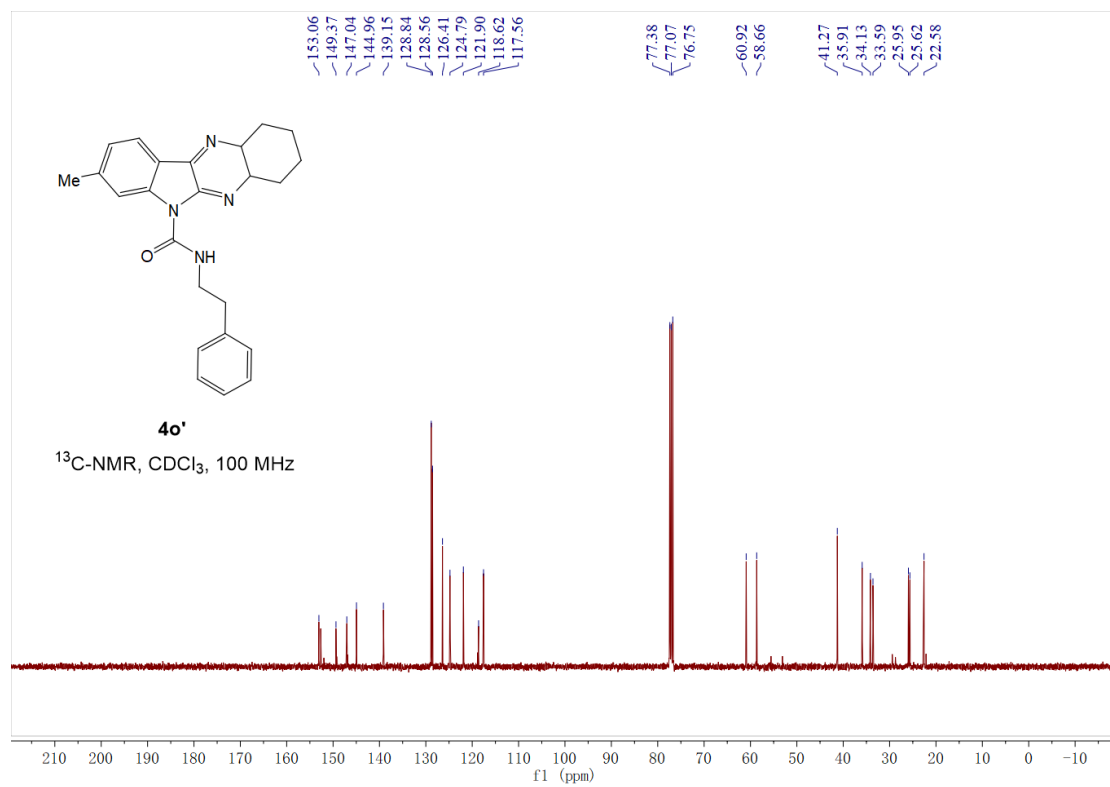

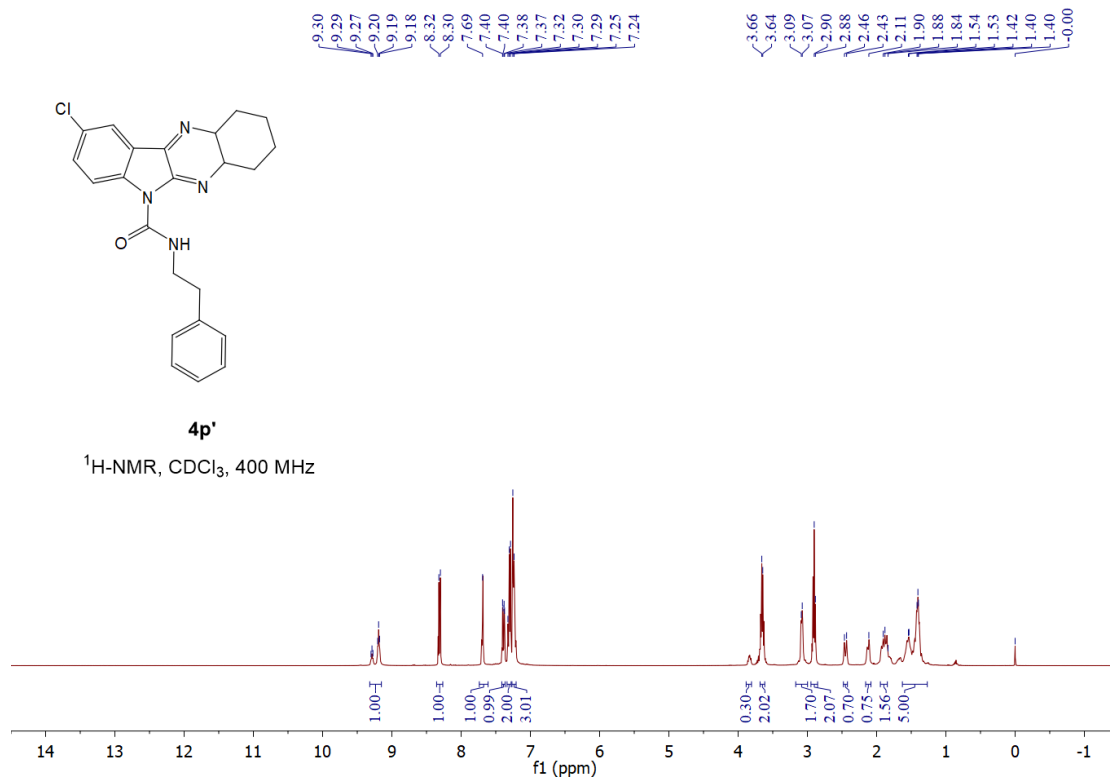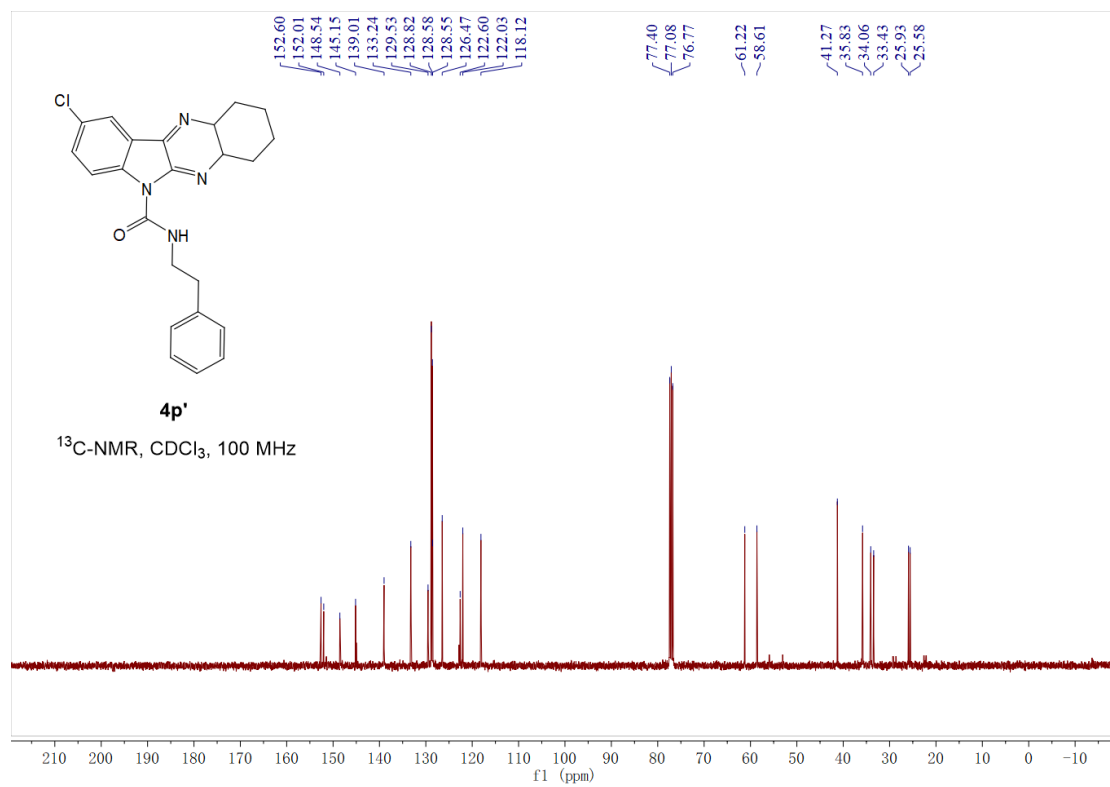



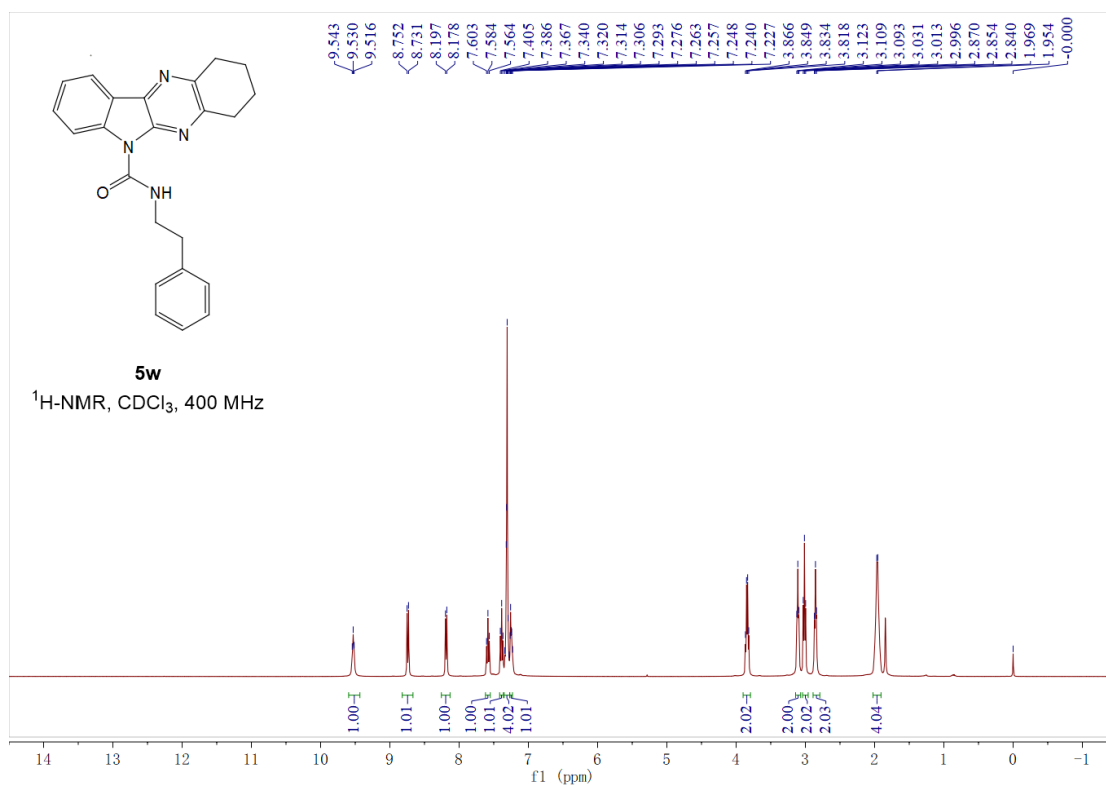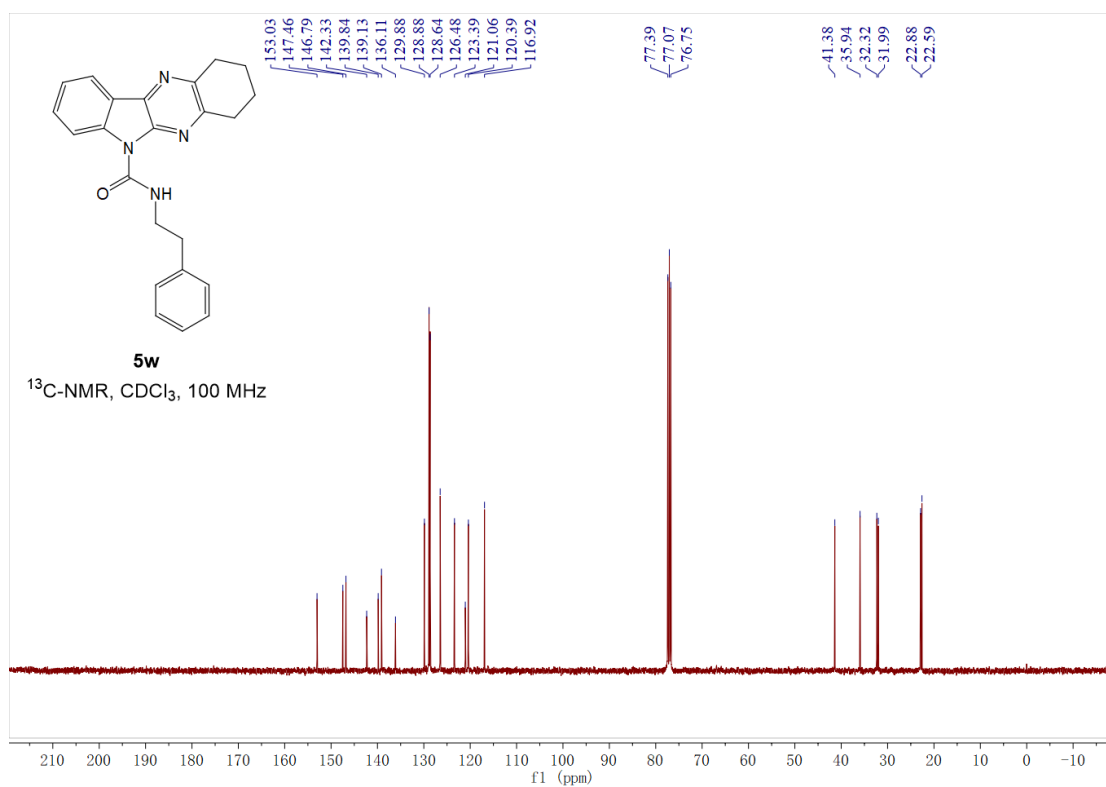

Supplement: d3ob01967e1.pdf [file d3ob01967e1.pdf]
